# Supplementary material for: Evaluation of seven recombinant VCA-IgA ELISA kits for the diagnosis of nasopharyngeal carcinoma in China: a case–control trial
Source: PubMed Central journal article supplement — BMJ Open. 2017 Jul 2;7(6):e013211. doi: 10.1136/bmjopen-2016-013211 (PMC5734215; doi:10.1136/bmjopen-2016-013211), 2017-07-02
Supplement: bmjopen-2016-013211.draft_revisions.pdf [file bmjopen-2016-013211.draft_revisions.pdf]

# BMJ Open

## Evaluation of seven recombinant VCA-IgA ELISA kits for the diagnosis of nasopharyngeal carcinoma in China: a case-control trial

|                                 |                                                                                                                                                                                                                                                                                                                                                                                                                                                                                                                                                                                                                                                                                                                                                                                                                                                                                                                                                                                                                                                                                                                                                                                                                                                                                                                                                                                                                                                                                                                                                                                                                                                                                                                                                                                                                                                                                                                  |
|---------------------------------|------------------------------------------------------------------------------------------------------------------------------------------------------------------------------------------------------------------------------------------------------------------------------------------------------------------------------------------------------------------------------------------------------------------------------------------------------------------------------------------------------------------------------------------------------------------------------------------------------------------------------------------------------------------------------------------------------------------------------------------------------------------------------------------------------------------------------------------------------------------------------------------------------------------------------------------------------------------------------------------------------------------------------------------------------------------------------------------------------------------------------------------------------------------------------------------------------------------------------------------------------------------------------------------------------------------------------------------------------------------------------------------------------------------------------------------------------------------------------------------------------------------------------------------------------------------------------------------------------------------------------------------------------------------------------------------------------------------------------------------------------------------------------------------------------------------------------------------------------------------------------------------------------------------|
| Journal:                        | <i>BMJ Open</i>                                                                                                                                                                                                                                                                                                                                                                                                                                                                                                                                                                                                                                                                                                                                                                                                                                                                                                                                                                                                                                                                                                                                                                                                                                                                                                                                                                                                                                                                                                                                                                                                                                                                                                                                                                                                                                                                                                  |
| Manuscript ID                   | bmjopen-2016-013211                                                                                                                                                                                                                                                                                                                                                                                                                                                                                                                                                                                                                                                                                                                                                                                                                                                                                                                                                                                                                                                                                                                                                                                                                                                                                                                                                                                                                                                                                                                                                                                                                                                                                                                                                                                                                                                                                              |
| Article Type:                   | Research                                                                                                                                                                                                                                                                                                                                                                                                                                                                                                                                                                                                                                                                                                                                                                                                                                                                                                                                                                                                                                                                                                                                                                                                                                                                                                                                                                                                                                                                                                                                                                                                                                                                                                                                                                                                                                                                                                         |
| Date Submitted by the Author:   | 27-Jun-2016                                                                                                                                                                                                                                                                                                                                                                                                                                                                                                                                                                                                                                                                                                                                                                                                                                                                                                                                                                                                                                                                                                                                                                                                                                                                                                                                                                                                                                                                                                                                                                                                                                                                                                                                                                                                                                                                                                      |
| Complete List of Authors:       | Gao, Rui; Sun Yat-sen University Cancer Center, State Key Laboratory of Oncology in Southern China, Department of Cancer Prevention; Sun Yat-Sen University, School of Public Health<br>Wang, Lin; Sun Yat-sen University Cancer Center, State Key Laboratory of Oncology in Southern China, Department of Nasopharyngeal Carcinoma<br>Zhang, Lifang; Guangzhou Women and Children's Medical Center, Division of Birth Cohort Study<br>Ye, Yanfang; Sun Yat-Sen University, Sun Yat-sen Memorial Hospital<br>Xie, Shanghang; Sun Yat-sen University Cancer Center, State Key Laboratory of Oncology in Southern China, Department of Cancer Prevention<br>Du, Jinlin; Sun Yat-sen University Cancer Center, State Key Laboratory of Oncology in Southern China, Department of Cancer Prevention; Sun Yat-Sen University, School of Public Health<br>Chen, Suihong; Sun Yat-sen University Cancer Center, State Key Laboratory of Oncology in Southern China, Department of Cancer Prevention; Sun Yat-Sen University, School of Public Health<br>Guo, Jie; Sun Yat-sen University Cancer Center, State Key Laboratory of Oncology in Southern China, Department of Cancer Prevention; Sun Yat-Sen University, School of Public Health<br>Yang, Mengjie ; Sun Yat-sen University Cancer Center, State Key Laboratory of Oncology in Southern China, Department of Cancer Prevention; Sun Yat-Sen University, School of Public Health<br>Lin, Chuyang; Sun Yat-sen University Cancer Center, State Key Laboratory of Oncology in Southern China, Department of Cancer Prevention; Sun Yat-Sen University, School of Public Health<br>Liu, Qing; Sun Yat-sen University Cancer Center, State Key Laboratory of Oncology in Southern China, Department of Cancer Prevention<br>Cao, Sumei; Sun Yat-sen University Cancer Center, State Key Laboratory of Oncology in Southern China, Department of Cancer Prevention |
| <b>Primary Subject Heading</b>: | Oncology                                                                                                                                                                                                                                                                                                                                                                                                                                                                                                                                                                                                                                                                                                                                                                                                                                                                                                                                                                                                                                                                                                                                                                                                                                                                                                                                                                                                                                                                                                                                                                                                                                                                                                                                                                                                                                                                                                         |
| Secondary Subject Heading:      | Diagnostics, Epidemiology, Research methods                                                                                                                                                                                                                                                                                                                                                                                                                                                                                                                                                                                                                                                                                                                                                                                                                                                                                                                                                                                                                                                                                                                                                                                                                                                                                                                                                                                                                                                                                                                                                                                                                                                                                                                                                                                                                                                                      |
| Keywords:                       | Nasopharyngeal carcinoma, Epstein-Barr virus, VCA-IgA, Diagnostic effect, Screening                                                                                                                                                                                                                                                                                                                                                                                                                                                                                                                                                                                                                                                                                                                                                                                                                                                                                                                                                                                                                                                                                                                                                                                                                                                                                                                                                                                                                                                                                                                                                                                                                                                                                                                                                                                                                              |
|                                 |                                                                                                                                                                                                                                                                                                                                                                                                                                                                                                                                                                                                                                                                                                                                                                                                                                                                                                                                                                                                                                                                                                                                                                                                                                                                                                                                                                                                                                                                                                                                                                                                                                                                                                                                                                                                                                                                                                                  |

1  
2  
3  
4  
5  
6  
7  
8  
9  
10  
11  
12  
13  
14  
15  
16  
17  
18  
19  
20  
21  
22  
23  
24  
25  
26  
27  
28  
29  
30  
31  
32  
33  
34  
35  
36  
37  
38  
39  
40  
41  
42  
43  
44  
45  
46  
47  
48  
49  
50  
51  
52  
53  
54  
55  
56  
57  
58  
59  
60

SCHOLARONE™  
Manuscripts

For peer review only

1  
2  
3 **Evaluation of seven recombinant VCA-IgA ELISA kits for the diagnosis of**  
4 **nasopharyngeal carcinoma in China: a case-control trial**  
5  
6

7 Rui Gao<sup>1,2\*</sup>, Lin Wang<sup>3\*</sup>, Li-Fang Zhang<sup>4</sup>, Yan-Fang Ye<sup>5</sup>, Shang-Hang Xie<sup>1</sup>, Jin-Lin  
8 Du<sup>1,2</sup>, Sui-Hong Chen<sup>1,2</sup>, Jie Guo<sup>1,2</sup>, Meng-Jie Yang<sup>1,2</sup>, Chu-yang Lin<sup>1,2</sup>, Qing liu<sup>1#</sup>,  
9 Su-Mei Cao<sup>1#</sup>  
10

11 <sup>1</sup>Department of Cancer Prevention, Sun Yat-sen University Cancer Center, State Key  
12 Laboratory of Oncology in Southern China, Guangzhou, 510060, P.R. China;

13 <sup>2</sup>School of Public Health, Sun Yat-Sen University, Guangzhou, 510060, P.R. China;

14 <sup>3</sup>Department of Nasopharyngeal Carcinoma, Sun Yat-sen University Cancer Center,  
15 State Key Laboratory of Oncology in Southern China, Guangzhou, 510060, P.R.  
16 China;

17 <sup>4</sup>Division of Birth Cohort Study, Guangzhou Women and Children's Medical Center,  
18 Guangzhou, 510623, P.R. China;

19 <sup>5</sup>Sun Yat-sen Memorial Hospital, Sun Yat-sen University, Guangzhou, 510120, P.R.  
20 China.

21 \*These authors contributed equally to this work.  
22  
23

24  
25  
26  
27 **#Correspondence to**

28 Prof. Su-Mei Cao, caosm@sysucc.org.cn;

29 Prof. Qing Liu, liuqing@sysucc.org.cn  
30  
31

32 Authors' E-mail:

33 Rui Gao: gaor5@mail2.sysu.edu.cn

Lin Wang: wangl1@sysucc.org.cn

34 Li-Fang Zhang: lifanglydia@hotmail.com

Yan-Fang Ye: yeyanfang1@gmail.com

35 Shang-Hang Xie: xieshh@sysucc.org.cn

Jin-Lin Du: dujl3@mail2.sysu.edu.cn

36 Sui-Hong Chen: chensh43@mail2.sysu.edu.cn

Jie Guo: guojiegina@126.com

37 Meng-Jie Yang: yangmj@sysucc.org.cn  
38 Chu-yang Lin: linchy23@mail2.sysu.edu.cn  
39  
40

41 Preferred reviewers:

42 1. Fang Fang, Fang.Fang@ki.se, Department of Medical Epidemiology and  
43 Biostatistics, Karolinska Institutet, Stockholm, Sweden.

44 2. Liming Liang, lliang@hsph.harvard.edu, Departments of Epidemiology and  
45 Biostatistics, Harvard School of Public Health, Boston, MA, US.

46 3. Qing Chen, qingchen@fimmu.com, Department of Epidemiology, School of  
47 Public Health and Tropical Medicine, Southern Medical University, Guangzhou,  
48 China  
49  
50  
51

52 **Key words:** Nasopharyngeal carcinoma, Epstein-Barr virus, VCA-IgA, Diagnostic  
53 effect, Screening  
54

55 Word count: 2695  
56  
57  
58  
59  
60

## ABSTRACT

**Objective:** Seven recombinant VCA-IgA ELISA kits are widely used in China, but their diagnostic effects have not been evaluated. In this study, we evaluated whether the diagnostic effects of these kits are similar to those of the standard kit (EUROIMMUN, Lübeck, Germany).

**Methods:** A diagnostic case-control trial was conducted, with 200 cases of nasopharyngeal carcinoma (NPC) and 200 controls from NPC-endemic areas in southern China. The areas under the curve (AUCs), the sensitivities and the specificities of testing kits were compared with those of the standard kit. The test-retest reliability of each kit was determined by intraclass correlation coefficient (ICC). Their diagnostic accuracy in combination with EBNA1-IgA was also evaluated in logistic models.

**Results:** Three testing kits – KSB, BB and HA – showed diagnostic accuracy equal to that of the standard kit, with good performance in the AUCs (0.926~0.945), and no significant differences in sensitivity were found between early- and advanced-stage NPCs. ICCs exceeded 0.8. Three new logistic regression models were built, and the AUCs of these models (0.961~0.977) were better than those of the individual VCA-IgA kits. All new models had diagnostic accuracy equal to that of the standard kit. New cutoff values of these three kits and their corresponding combinations for the early detection of and screening for NPC were defined.

**Conclusions:** Three recombinant VCA-IgA kits – KSB, BB and HA – had diagnostic effects equal to those of the standard kit, and, in combination with EBNA1-IgA in logistic regression models, can be used in future screening for NPC.

### Strengths and limitations of this study

- This is the first study to carry out a comprehensive evaluation of recombinant commercial diagnostic VCA-IgA (ELISA) kits in China, and new logistic models combining VCA-IgA with EBNA1-IgA were established.
- New cutoff values for VCA-IgA kits and their corresponding combinations were defined for the early detection of and screening for NPC.
- All cases and controls were from NPC-endemic areas of southern China, and thus these results might not be applicable to other populations.
- Cutoff values for NPC screening by means of the new models described in this study must be verified in prospective mass screening.

## INTRODUCTION

Nasopharyngeal carcinoma (NPC) is a common form of squamous-cell carcinoma in southern China and southeastern Asia. The annual incidence rate of NPC in southern China can reach 25 per 100,000, which is about 25-fold higher than in the rest of the world.<sup>1-4</sup> NPC is a complex disease caused by a combination of Epstein-Barr virus (EBV), chronic infection, the environment and host genes in a multi-step process of carcinogenesis, but until now there have been no effective preventive measures.<sup>5-9</sup> Long-term survival rates differ substantially between patients with advanced- (stages III and IV) and early- (stages I and II) stage NPC. Four-year survival rates of

1  
2  
3 early-stage NPC patients are 96.7% compared with 67.1% for those with  
4 advanced-stage NPC.<sup>5</sup> Mass screening has become the most practical method for  
5 improved early detection in and overall prognosis of NPC patients in the endemic  
6 areas.<sup>10 11</sup>  
7  
8

9  
10 Serum antibodies against EBV-related antigens, especially immunoglobulin A (IgA)  
11 against viral capsid antigen (VCA-IgA), early antigen (EA-IgA), EBV nuclear antigen  
12 1 (EBNA1-IgA) and so on, remain elevated for an average of 38 months in the  
13 preclinical phase,<sup>9-14</sup> and serological tests for these markers are simple and  
14 inexpensive.<sup>15-18</sup> Therefore, since the 1970s, these tests have been used as screening  
15 markers for NPC in endemic areas. In our previous study, we evaluated the diagnostic  
16 performance of seven commercial EBV-related antibodies by enzyme-linked  
17 immunosorbent assay (ELISA) and found EBNA1-IgA (Zhongshan Biotech, China)  
18 and VCA-IgA (EUROIMMUN, Lübeck, Germany) ELISA to be the top two  
19 seromarkers, with AUCs of 0.95 (95%CI, 0.93–0.97) and 0.94 (95%CI, 0.92–0.97),  
20 respectively. We further verified that the combination of VCA-IgA and EBNA1-IgA  
21 outperformed any individual EBV seromarkers, with AUC up to 0.97 (95%CI, 0.96,  
22 0.99).<sup>15-17</sup> Thus, since 2011, the combination of VCA-IgA and EBNA1-IgA has been  
23 recommended as the standard tool for NPC screening in China.<sup>18</sup>  
24  
25  
26  
27

28 The EBV capsid antigen (VCA) is a late protein produced in the EBV lytic infection  
29 period. VCA contains a batch of capsid proteins, such as VCA-p18 (BFRF3),  
30 VCA-p23 (BLRF2), gp125/110 (BALF4) and so on, which have unique immune  
31 dominants and virus-specific antigenic domains. These domains contain several small  
32 peptide regions (epitopes) which can be combined to form a powerful diagnostic  
33 reagent for VCA-IgA.<sup>19 20</sup> The capsid proteins in the EUROIMMUN kit<sup>21</sup> were  
34 extracted from the pyrolysis products of human B lymphocytes (P3HR1 cell line)  
35 infected by EBV and contained a combined native capsid protein of EBV. In addition,  
36 several kinds of commercial VCA-IgA kits based on recombinant peptides have been  
37 developed in China and are presently widely used for the early detection of and  
38 screening for NPC. However, their diagnostic performance for NPC alone and in  
39 combination with EBNA1-IgA has not been evaluated. In this study, we evaluated  
40 whether the effects of the NPC-diagnostic kits are comparable with those of the  
41 standard VCA-IgA kit and can be substituted for it. If so, we will further explore the  
42 combination diagnostic strategy with EBNA1-IgA for the early detection of and mass  
43 screening for NPC.  
44  
45  
46  
47  
48

## 49 **METHODS**

### 50 **Study population**

51 Serum specimens were continuously collected from 200 patients hospitalised with  
52 NPC in the Sun Yat-sen University Cancer Center (SYSUCC) from January  
53 2013 to June 2013. These cases were histologically confirmed by biopsy, and the  
54 clinical stages were classified according to the 2009 Union for International Cancer  
55 Control (UICC) criteria, including 33 patients with early-stage NPC (stages I, II) and  
56  
57  
58  
59  
60

167 with advanced-stage NPC (stages III, IV). The inclusion criteria included being between 30 and 59 years of age and residing in one of the six high-endemic provinces of southern China (Guangdong, Guangxi, Jiangxi, Hunan, Fujian or Hainan Province). Other information, including demographic data, smoking, drinking histories and family history of NPC, was collected by the physician in charge. All serum samples were collected before treatment.

The 200 healthy controls were randomly selected from among healthy people who participated in physical examinations at the Sihui Cancer Center (Sihui City, Guangdong Province, China) from July 2013 to September 2013 and were frequency-matched with cases by age (5-year age groups) and gender. All participants completed a short questionnaire to record demographic data, smoking, drinking histories and family history of NPC and donated 3 mL of blood.

This study was approved by the Clinical Research Ethics Committee of the SYSUCC (YB2015-029-01), and all participants provided written informed consent.

#### Detection of serological EBV antibodies

Serum and buffy coat were separated less than 4 hours after collection and stored at -80°C before being tested. None of the specimens was hemolytic or repeatedly frozen more than twice. Seven recombinant VCA-IgA kits, the standard VCA-IgA kit (EUROIMMUN) and the standard EBNA1-IgA kit (Zhongshan) were tested (table 1).

**Table 1** Product information for eight brands of VCA-IgA kits and the EBNA1-IgA kit

| Abbreviation for kits | Manufacturer                                     |
|-----------------------|--------------------------------------------------|
| VCA-IgA               |                                                  |
| KSB                   | Shenzhen Kang Sheng Bao Bio-Technology Co., Ltd. |
| BNV                   | Bioneovan Co., Ltd.                              |
| GBI                   | Beijing BGI-GBI Biotech Co., Ltd.                |
| BB                    | Beijing Beier Bioengineering Co., Ltd.           |
| HA                    | Shenzhen HuianBioscience Co., Ltd.               |
| HK                    | Shen Zhen HuaKang Co., Ltd.                      |
| ZS                    | ZhongShan Biotech Co., Ltd.                      |
| EUROIMMUN             | EUROIMMUN Medizinische Labordiagnostika AG       |
| EBNA1-IgA             | ZhongShan Biotech Co., Ltd.                      |

All samples were renumbered and tested blindly by one technician according to the manufacturers' instructions. Levels of antibodies were assessed by photometric measurement, which provided optical density (OD) values. Reference ODs (rOD) were obtained according to manufacturers' instructions by dividing OD values by a reference control. To investigate the test-retest reliability of each kit, 10% serum samples (40 samples) were randomly chosen and retested.

### Statistical analysis

Demographic characteristics and NPC risk factors between cases and controls were compared by chi-squared tests. The cutoff value of each single kit was defined with the largest Youden Indices (sensitivity+specificity-1) chosen from each receiver operating characteristic (ROC). The diagnostic efficacy of each kit was evaluated by AUC, and non-inferiority tests based on the bootstrap approach were performed to determine whether the AUCs of these recombinant testing kits were inferior to that of the standard kit ( $\Delta=0.05$ ).<sup>22-25</sup> The sensitivity and specificity of each kit were calculated, and their 95% confidence intervals (CIs) were estimated by the methods of Simel and colleagues.<sup>26</sup> Differences in sensitivities and specificities of the testing kits compared with those of the standard kit and differences in sensitivities between early- and advanced-stage NPC with each kit were compared by chi-squared tests. Intraclass correlation coefficients (ICC) were performed to determine test-retest reliability.

Binary unconditional logistic regressions were used to establish formulae for VCA-IgA and EBNA1-IgA. The diagnostic efficacy of each formula was evaluated by sensitivity, specificity and AUC, compared with the standard formula,  $\text{Logit } P = -3.934 + 2.203 \text{ VCA-IgA} + 4.797 \text{ EBNA1-IgA}$ . The cutoff p-value in the corresponding logistic regression for distinguishing between NPC cases and controls was defined with the largest Youden Index chosen from each ROC. Two minimally acceptable false-positive rates (1-Specificity), 3% and 7%, were used empirically to establish the cutoff p-values for classifying different NPC risk subgroups.<sup>16 17</sup>

The non-inferiority tests were one-sided, and  $p>0.05$  was considered to be non-inferior. Other tests were two-sided, and  $p<0.05$  was considered to be statistically significant. Data were analysed by SAS9.2 and SPSS16.0 software.

## RESULTS

### Baseline information

Baseline information on gender, age, smoking, drinking and NPC family history was comparable between cases and controls, and no statistically significant differences were found between them. Further, there were no statistically significant differences for these items between early- and advanced-stage cases (table 2).

**Table 2** Demographic characteristics of NPC cases and controls

| Categories | NPC Cases (N <sub>1</sub> =200) No. (%) |                        |                | Total      | Controls (N <sub>2</sub> =200) No. (%) | p <sup>5</sup> |
|------------|-----------------------------------------|------------------------|----------------|------------|----------------------------------------|----------------|
|            | Early stage (n=33)                      | Advanced stage (n=167) | p <sup>4</sup> |            |                                        |                |
| Gender     |                                         |                        | 0.472          |            |                                        | 0.417          |
| Male       | 27 (81.8)                               | 127 (76.0)             |                | 154 (77.0) | 147 (73.5)                             |                |
| Female     | 6 (18.2)                                | 40 (24.0)              |                | 46 (23.0)  | 53 (26.5)                              |                |

|                                 |           |            |       |            |            |
|---------------------------------|-----------|------------|-------|------------|------------|
| Age (years)                     |           |            | 0.299 |            | 0.785      |
| 30~                             | 6 (18.2)  | 47 (28.1)  |       | 53 (26.5)  | 47 (23.5)  |
| 40~                             | 13 (39.4) | 70 (41.9)  |       | 83 (41.5)  | 87 (43.5)  |
| 50~                             | 14 (42.4) | 50 (29.9)  |       | 64 (32.0)  | 66 (33.0)  |
| Smoking <sup>1</sup>            |           |            | 0.857 |            | 0.746      |
| Yes                             | 11 (33.3) | 53 (31.7)  |       | 64 (32.0)  | 61 (30.5)  |
| No                              | 22 (66.7) | 114 (68.3) |       | 136 (68.0) | 139 (69.5) |
| Drinking <sup>2</sup>           |           |            | 0.641 |            | 0.494      |
| Yes                             | 6 (18.2)  | 25 (15.0)  |       | 31 (15.5)  | 27 (13.5)  |
| No                              | 27 (81.8) | 142 (85.0) |       | 169 (84.5) | 173 (86.5) |
| NPC family history <sup>3</sup> |           |            | 0.732 |            | 0.224      |
| Yes                             | 3 (9.1)   | 13 (7.8)   |       | 16 (8.0)   | 10 (5.0)   |
| No                              | 30 (90.9) | 154 (92.2) |       | 184 (92.0) | 190 (95.0) |

<sup>1</sup>'Smoking' refers to people who smoked more than one cigarette every three days within half a year and included current and former smokers. <sup>2</sup>'Drinking' refers to people who consumed alcoholic beverages every week within half a year and included current and former drinkers. <sup>3</sup>'NPC family history' refers to people whose parents, children and siblings have or did have NPC. <sup>4</sup>Differences in early- and advanced-stage NPC were compared by chi-squared tests. \*p<0.05 was considered as significant. <sup>5</sup>Differences in NPC Cases and Controls were compared by chi-squared tests. \*p<0.05 was considered as significant.

### The diagnostic accuracies of eight brands of VCA-IgA kits and the EBNA1-IgA kit

Table 3 shows that the AUCs of four kits – KSB, BB, BNV and HA – were as high as that of the standard VCA-IgA kit (AUC, 0.942; 95%CI, 0.920-0.964). The AUCs, in order, were 0.945 for KSB (95%CI 0.925-0.966), 0.940 for BB (95%CI 0.916-0.964), 0.936 for BNV (95%CI 0.911-0.961) and 0.926 for HA (95%CI 0.900-0.953). Also, no differences in sensitivities and specificities were found between these four kits and the standard kit. In addition, the AUCs of GBI, HK and ZS were lower than that of the standard kit. Furthermore, no significant differences were found between early- and advanced-stage NPC in the sensitivities of six kits (p>0.05), except for BNV (p=0.044).

**Table 3** The diagnostic accuracies of eight brands of VCA-IgA kits and the EBNA1-IgA kit in distinguishing between NPC cases and controls

| Kits      | Cutoff values <sup>1</sup> | Sensitivity (%)     |                        |                              | Specificity (%)               | AUC (95%CI)         | p <sup>5</sup> |
|-----------|----------------------------|---------------------|------------------------|------------------------------|-------------------------------|---------------------|----------------|
|           |                            | Early stage (95%CI) | Advanced stage (95%CI) | Average (95%CI) <sup>3</sup> | Control (95% CI) <sup>4</sup> |                     |                |
| VCA-IgA   |                            |                     |                        |                              |                               |                     |                |
| <b>BB</b> | 0.58                       | 75.8 (69.8-81.7)    | 88.6 (84.2-93.0)       | 86.5 (81.8-91.2)             | 92.0 (88.2-95.8)              | 0.940 (0.916-0.964) | 0.002          |



|           |       |                        |                      |                      |                     |                        |        |
|-----------|-------|------------------------|----------------------|----------------------|---------------------|------------------------|--------|
| BNV       | 0.923 | 72.7<br>(66.6-78.9)    | 88.0<br>(83.5-92.5)* | 86.0<br>(81.2-90.8)  | 93.5<br>(90.1-96.9) | 0.936<br>(0.911-0.961) | 0.003  |
| GBI       | 0.825 | 72.7<br>(66.6-78.9)    | 76.6<br>(70.8-82.5)  | 76.0<br>(70.1-81.9)* | 92.0<br>(88.2-95.8) | 0.899<br>(0.868-0.930) | 0.341* |
| HA        | 0.884 | 93.9<br>(90.6-97.2)    | 88.0<br>(83.5-92.5)  | 89.0<br>(84.7-93.3)  | 86.0<br>(81.2-90.8) | 0.926<br>(0.900-0.953) | 0.012  |
| HK        | 1.218 | 81.8<br>(76.5-87.2)    | 83.2<br>(78.1-88.4)  | 83.0<br>(77.8-88.2)  | 89.5<br>(85.3-93.7) | 0.913<br>(0.884-0.942) | 0.075* |
| KSB       | 0.283 | 100.0<br>(100.0-100.0) | 86.8<br>(82.1-91.5)  | 89.0<br>(84.7-93.3)  | 87.5<br>(82.9-92.1) | 0.945<br>(0.925-0.966) | 0.000  |
| ZS        | 0.418 | 75.8<br>(69.8-81.7)    | 74.3<br>(68.2-80.3)  | 74.5<br>(68.5-80.5)* | 87.5<br>(82.9-92.1) | 0.868<br>(0.831-0.904) | 0.878* |
| EUROIMMU  |       |                        |                      |                      |                     |                        |        |
| N         | 1.561 | 87.9<br>(83.4-92.4)    | 85.6<br>(80.8-90.5)  | 86.0<br>(81.2-90.8)  | 90.0<br>(85.8-94.2) | 0.942<br>(0.921-0.964) |        |
| EBNA1-IgA | 1.203 | 93.9<br>(90.6-97.2)    | 86.2<br>(81.5-91.0)  | 87.5<br>(82.9-92.1)  | 92.5<br>(88.8-96.2) | 0.956<br>(0.937-0.975) | 0.000  |

<sup>1</sup>Cutoff value for NPC diagnosis was defined as the value with the largest Youden Index chosen from each ROC.

<sup>2</sup>Differences in the sensitivities of early- and advanced-stage NPC were compared by chi-squared tests. \* $p < 0.05$  was considered as significant. <sup>3</sup>Differences in the sensitivities of EUROIMMUN and other kits were compared by chi-squared tests. \* $p < 0.05$  was considered as significant. <sup>4</sup>Differences in the specificities of EUROIMMUN and other kits were compared by chi-squared tests. \* $p < 0.05$  was considered as significant. <sup>5</sup> $p$  values were estimated by non-inferiority tests based on the bootstrap approach for AUC between EUROIMMUN and other kits. \* $p > 0.05$  was considered as significant.

### The test–retest reliabilities of eight brands of VCA-IgA kits and the EBNA1-IgA kit

Ten percent serum samples (40 samples) were randomly chosen and retested for calculation of the ICC of each brand of kit, VCA-IgA or EBNA1-IgA. The test-retest reliabilities of all kits were excellent ( $>0.75$ ) according to Fleiss's classification<sup>27</sup> (table 4).

**Table 4** The test–retest reliabilities of eight brands of VCA-IgA kits and the EBNA1-IgA kit

| Kits    | ICC   | 95%CI       |
|---------|-------|-------------|
| VCA-IgA |       |             |
| BB      | 0.990 | 0.980-0.994 |
| BNV     | 0.982 | 0.967-0.991 |
| GBI     | 0.964 | 0.933-0.981 |
| HA      | 0.975 | 0.952-0.987 |
| HK      | 0.876 | 0.764-0.935 |
| KSB     | 0.823 | 0.666-0.906 |
| ZS      | 0.978 | 0.958-0.988 |

|           |       |             |
|-----------|-------|-------------|
| EUROIMMUN | 0.913 | 0.830-0.955 |
| EBNA1-IgA | 0.981 | 0.964-0.990 |

### The diagnostic accuracies of the combinations of VCA-IgA and EBNA1-IgA with logistic models

We chose for testing three VCA-IgA kits with high AUCs, no differences in diagnoses for early- and later-stage NPC and excellent test-retest reliabilities, and then combined each with the EBNA1-IgA kit by logistic models. Three new logistic regression models were established:

$$\text{Logit}P = -3.2323 + 0.8060\text{VCA-IgA (BB)} + 1.1044 \text{ EBNA1-IgA}$$

$$\text{Logit}P = -2.7591 + 0.6380\text{VCA-IgA (HA)} + 1.0620\text{EBNA1-IgA}$$

$$\text{Logit}P = -2.6039 + 0.5312\text{VCA-IgA (KSB)} + 1.1673 \text{ EBNA1-IgA}$$

In all these models, both VCA-IgA and EBNA1-IgA were statistically significant independent predictors of NPC risk ( $p < 0.05$ ), and the AUC of each combination was statistically significantly larger than that of each single VCA-IgA ( $p < 0.05$ ). The AUC of KSB increased from 0.945 (95%CI 0.925-0.966) to 0.964 (95%CI 0.947-0.981); BB increased from 0.940 (95%CI 0.916-0.964) to 0.977 (95%CI 0.963-0.991); and HA increased from 0.926 (95%CI 0.900-0.953) to 0.961 (95%CI 0.943-0.979) (figure 1).

Table 5 shows the diagnostic accuracies of the three new combinations and the standard combination [ $\text{Logit} P = -3.934 + 2.203\text{VCA-IgA (EUROIMMUN)} + 4.797\text{EBNA1-IgA}$ ] in distinguishing between NPC cases and controls. The AUCs of the three new combinations were as high as that of the standard combination (AUC, 0.970; 95%CI, 0.956-0.985) ( $p < 0.05$ ). Furthermore, no statistically significant difference was found in the sensitivity of each combination between early- and advanced-stage NPC ( $p > 0.05$ ).

We used two minimally acceptable false-positive rates (1-Specificity) of 3% and 7% to define the high-risk and medium-risk cutoff values for the new combinations. The corresponding logistic regression p-values were 0.707 and 0.232 for BB, 0.766 and 0.364 for HA and 0.831 and 0.384 for KSB, and the corresponding true-positive rates (sensitivities) were 88.0% and 93.5% for BB, 78.0% and 88.0% for HA and 79.0% and 87.5% for KSB.

**Table 5** The diagnostic accuracies of three new combinations and the standard combination in distinguishing between NPC cases and controls

| Combination  | New cutoff values <sup>1</sup> | Sensitivity (%)     |                                     |                              | Specificity (%)              | AUC (95%CI)         | p <sup>5</sup> |
|--------------|--------------------------------|---------------------|-------------------------------------|------------------------------|------------------------------|---------------------|----------------|
|              |                                | Early stage (95%CI) | Advanced stage (95%CI) <sup>2</sup> | Average (95%CI) <sup>3</sup> | Control (95%CI) <sup>4</sup> |                     |                |
| BB+EBNA1-IgA | 0.258                          | 97.0 (94.6-99.3)    | 92.8 (89.2-96.4)                    | 93.5 (90.1-96.9)             | 95.0 (92.0-98.0)             | 0.977 (0.963-0.991) | 0.000          |

|                      |       |                     |                     |                     |                      |                        |       |
|----------------------|-------|---------------------|---------------------|---------------------|----------------------|------------------------|-------|
| <i>HA+EBNA1-IgA</i>  | 0.379 | 97.0<br>(94.6-99.3) | 86.2<br>(81.5-91.0) | 88.0<br>(83.5-92.5) | 94.0<br>(90.7-97.3)  | 0.961<br>(0.943-0.979) | 0.000 |
| <i>KSB+EBNA1-IgA</i> | 0.191 | 93.9<br>(90.6-97.2) | 94.6<br>(91.5-97.7) | 94.5<br>(91.3-97.7) | 87.0<br>(82.3-91.7)* | 0.964<br>(0.947-0.981) | 0.000 |
| Standard combination | 0.998 | 97.0<br>(94.6-99.3) | 88.6<br>(84.2-93.0) | 90.0<br>(85.8-94.2) | 95.5<br>(92.6-98.4)  | 0.970<br>(0.956-0.985) |       |

<sup>1</sup>New cutoff value for NPC diagnosis was defined as the value with the largest Youden Index chosen from each ROC. <sup>2</sup>Differences in the sensitivity of early- and advanced-stage NPC were compared by chi-squared tests. \* $p < 0.05$  was considered as significant. <sup>3</sup>Differences in the sensitivities of the new combinations and the standard combination were compared by chi-squared tests. \* $p < 0.05$  was considered as significant. <sup>4</sup>Differences in the specificities of the new combinations and the standard combination were compared by chi-squared tests. \* $p < 0.05$  was considered as significant. <sup>5</sup>p-values were estimated by non-inferiority tests based on the bootstrap approach for AUC between new combinations and the standard combination. \* $p > 0.05$  was considered as significant.

## DISCUSSION

In our study, seven recombinant VCA-IgA kits were evaluated, and of these, KSB, BB and HA had diagnostic effects as good as those of the standard kit in terms of sensitivity, specificity and AUC. Combining VCA-IgA with EBNA1-IgA by logistic regression models increased the diagnostic accuracy of these three kits, and all combinations performed as well as the standard combination in sensitivity, specificity and AUC. This is the first study to carry out a comprehensive evaluation of recombinant commercial diagnostic VCA-IgA (ELISA) kits in China, and new logistic models combining VCA-IgA with EBNA1-IgA were established. Furthermore, new cutoff values for VCA-IgA kits and their corresponding combinations were defined for the early detection of and screening for NPC.

In this study, we first calculated the diagnostic performance of each brand of VCA/IgA kit. The AUC of the standard VCA-IgA kit (EUROIMMUN) was 0.942 (95%CI 0.920-0.964), which was consistent with results from our previous studies and verified that the diagnostic performance of VCA-IgA was good and stable.<sup>16 17</sup> We also found that the sensitivities, specificities and AUCs of three kits – KSB, BB and HA – were as high as those of the standard kit, and no significant differences in sensitivity were found between early- and advanced-stage NPC. Moreover, all test–retest reproducibilities were excellent ( $>0.8$ ). These results suggested that these three kits had equal diagnostic effects and can be substituted for the standard kit. The costs of these recombinant commercial diagnostic kits were only half that of the standard kit, making them more cost-effective.

We noticed that, in contrast to the standard kit with a combined native capsid protein, these testing kits contain primarily recombinant p18 capsid proteins (VCA-p18). VCA-p18 is a small capsid protein that contains several small peptide regions (epitopes) which can be combined to form a powerful diagnostic reagent for VCA-IgA antibody responses.<sup>20</sup> Some researchers have reported that VCA-p18 is the

1  
2  
3 major VCA antigen for IgA responses.<sup>20 28</sup> Our study showed that the AUCs of these  
4 VCA-p18 recombinant kits were more than 0.85, and three of them had the same  
5 diagnostic effects as the standard kit, suggesting that, although the manufacturing  
6 processes of some recombinant VCA-p18 kits still need to be improved, some of the  
7 recombinant kits can be substituted for the standard kit for NPC diagnosis.  
8  
9

10  
11 As the serum antibody level (rOD) provides continuous data, the cutoff value for  
12 distinguishing between NPC cases and controls is critical for the early detection of  
13 and screening for NPC. A reasonable cutoff value can balance sensitivity and  
14 specificity. In the early detection of and screening for NPC, high sensitivity is  
15 required for the identification of high-risk individuals, and high specificity is required  
16 for reducing the rate of misdiagnosis and associated costs. According to the cutoff  
17 values proved by kits' instructions (always 1), the sensitivities of testing kits were  
18 always too low, whilst their specificities were always too high. For example, the  
19 sensitivity and the specificity of KSB are 0.780 and 0.925, respectively, suggesting  
20 that the old cutoff values should be adjusted. We established new cutoff values for  
21 distinguishing between NPC cases and controls by Youdon Indices, and then obtained  
22 reasonable sensitivities and specificities. After adjustment, the new cutoff value for  
23 KSB is 0.283, and the sensitivity and specificity are 0.890 and 0.875, respectively.  
24 Moreover, no differences were found between sensitivities and specificities of these  
25 three kits – KSB, BB and HA – and those of the standard kit. There were also no  
26 statistically significant differences in the sensitivities of these three kits for early- and  
27 advanced-stage NPC.  
28  
29  
30  
31  
32

33  
34 As for the standard VCA, we found that the combinations of VCA-IgA and  
35 EBNA1-IgA by logistic models increased the diagnostic accuracy for NPC from less  
36 than 0.946 to more than 0.961 in AUCs. Sensitivities and specificities also increased.  
37 For example, the sensitivity and specificity of BB increased from 0.865 and 0.920 to  
38 0.935 and 0.955, respectively. VCA-IgA and EBNA1-IgA are two antibodies  
39 corresponding to EBV lytic-cycle proteins and latency gene products, respectively.  
40 Therefore, it is reasonable that host antibody responses for lytic-cycle and  
41 latency-associated EBV-related proteins can be complementary to each other in the  
42 diagnosis of NPC, and the combination of both could increase NPC diagnostic  
43 accuracy.<sup>11 29</sup> Furthermore, these three new combinations had diagnostic effects in  
44 sensitivities, specificities and AUCs equal to those of the standard combination,  
45 suggesting that the combinations of the three recombinant kits can be used for the  
46 early detection of and diagnostic screening for NPC. In this study, the control  
47 individuals came from NPC-endemic areas and belonged to a screening target  
48 population, so we attempted to define people at different risk levels by these new  
49 combinations for NPC screening. The NPC incidence rate in the screening target  
50 population was relatively low (about 50 per 100,000).<sup>2 10 30</sup> Thus, it is important that  
51 the false-positive rate be small enough to avoid unnecessary fiberoptic  
52 endoscopy/biopsies and psychological stress for the NPC screening participants.  
53 Conversely, the true-positive rate (equal to sensitivity) should be acceptable.<sup>31</sup> We  
54  
55  
56  
57  
58  
59  
60

1  
2  
3 used two minimally acceptable false-positive rates of 3% and 7% as the high-risk and  
4 medium-risk cutoff values, respectively,<sup>17</sup> and the corresponding true-positive rates  
5 (sensitivities) for these three kits were 78.0% to 88.0% and 87.5% to 93.5%,<sup>5</sup>  
6 respectively. If the baseline serologic results fulfilled the definition of high risk, the  
7 participants were referred for diagnostic examinations, and different screening  
8 intervals were assigned to the high-, medium- and low-risk groups. The screening  
9 intervals for these groups are 1, 1 and 4 years, respectively.<sup>17</sup>  
10  
11

12  
13 The study had some limitations. First, all cases and controls were from NPC-endemic  
14 areas of southern China; therefore, these results might not be applicable to other  
15 populations. Second, it was a diagnostic trial in case-control design, and new cutoff  
16 values of these new schemes for NPC screening from this study must be verified in  
17 prospective mass screenings.  
18  
19

## 20 21 CONCLUSIONS

22 Three recombinant VCA-IgA kits – KSB, BB and HA – had diagnostic effects equal  
23 to those of the standard kit. They can be substituted for the standard kit, and their  
24 combinations could be used in the early detection of and screening for NPC.  
25  
26

27 **Contributors** Su-Mei Cao and Qing Liu obtained the funding. Rui Gao, Lin Wang  
28 and Li-Fang Zhang contributed to study conception and design; Rui Gao conducted  
29 experiments; Lin Wang, Yan-Fang Ye, Jin-Lin Du, Shang-Hang Xie, Sui-Hong Chen,  
30 Jie Guo and Meng-Jie Yang, Chu-yang Lin acquired or cleaned the data; Rui Gao  
31 analysed and interpreted the data; Rui Gao, Su-Mei Cao and Qing Liu drafted or  
32 revised the manuscript. All authors critically revised the manuscript for important  
33 intellectual content. All authors read and approved the final version of the manuscript.  
34  
35  
36

37 **Funding** This work was supported by the National Natural Science Foundation (No.  
38 81373068) and the Special Fund for Public Health Trade (No. 201202014).  
39  
40

41 **Competing interests** The authors declare no conflicts of interest.  
42

43 **Ethics approval** This study was approved by the Sun Yat-sen University Cancer  
44 Center IRB (YB2015-029-01).  
45  
46

47 **Data sharing statement** Technical appendix, statistical code, and dataset available  
48 from the corresponding author at caosm@sysucc.org.cn and liuqing@sysucc.org.cn.  
49  
50

## 51 REFERENCES

- 52 1. Ma J, Cao S. The epidemiology of nasopharyngeal carcinoma. In: Lu JJ, Cooper JS,  
53 Lee AWM, eds. *Nasopharyngeal cancer*. Berlin: Springer, 2010:1–8.  
54 2. Jia W-H, Huang Q-H, Liao J, *et al*. Trends in incidence and mortality of  
55 nasopharyngeal carcinoma over a 20–25 year period (1978/1983–2002) in Sihui and  
56 Cangwu counties in southern China. *BMC Cancer* 2006;6:178–85.  
57  
58  
59  
60

3. Chang ET, Adami HO. The enigmatic epidemiology of nasopharyngeal carcinoma. *Cancer Epidemiol Biomarkers Prev* 2006;15:1765–77.
4. Cao SM, Simons MJ, Qian CN. The prevalence and prevention of nasopharyngeal carcinoma in China. *Chinese J Cancer* 2011;30:114–9.
5. Sarmiento MP, Mejia MB. Preliminary assessment of nasopharyngeal carcinoma incidence in the Philippines: a second look at published data from four centers. *Chinese J Cancer* 2014;33:159–64.
6. Jia WH. Complex segregation analysis of nasopharyngeal carcinoma in Guangdong, China: evidence for a multifactorial mode of inheritance (complex segregation analysis of NPC in China). *Eur J Hum Genet* 2005;13:248–52.
7. Yu MC, Yuan JM. Epidemiology of nasopharyngeal carcinoma. *Semin Cancer Biol* 2002;12:421–29.
8. Xue WQ, Qin HD, Ruan HL, *et al.* Quantitative association of tobacco smoking with the risk of nasopharyngeal carcinoma: a comprehensive meta-analysis of studies conducted between 1979 and 2011. *Am J Epidemiol* 2013;178:325–38.
9. Chien YC, Chen JY, Liu MY, *et al.* Serologic markers of Epstein-Barr virus infection and nasopharyngeal carcinoma in Taiwanese men. *N Engl J Med* 2001;345:1877–82.
10. Cao SM, Liu Z, Jia WH, *et al.* Fluctuations of Epstein-Barr virus serological antibodies and risk for nasopharyngeal carcinoma: a prospective screening study with a 20-year follow-up. *PLoS One* 2011;6:e19100.
11. Zeng Y, Zhong JM, Li LY, *et al.* Follow-up studies on Epstein-Barr virus IgA/VCA antibody-positive persons in Zangwu County, China. *Intervirology* 1983;20:190–4.
12. Chen M, Liu M, Hsu S, *et al.* Use of bacterially expressed EBNA-1 protein cloned from a nasopharyngeal carcinoma (NPC) biopsy as a screening test for NPC patients. *J Med Virol* 2001;64:51–7.
13. Zong YS, Sham JS, Ng MH, *et al.* Immunoglobulin A against viral capsid antigen of Epstein-Barr virus and indirect mirror examination of the nasopharynx in the detection of asymptomatic nasopharyngeal carcinoma. *Cancer* 1992;69:3–7.
14. Yi Z, Yuxi L, Chunren L, *et al.* Application of an immunoenzymatic method and an immunoradiographic method for a mass survey of nasopharyngeal carcinoma. *Intervirology* 1980;13:162–8.
15. Tang B, Liu Q, Cui Y, *et al.* Protocols of screening, early detection and diagnosis for nasopharyngeal carcinoma. In: Dong Z, Qiao Y, eds. *Protocols of screening, early detection and diagnosis for cancer in P.R.China*. Beijing: People's Medical Publishing House of P.R. China, 2009:187–8.
16. Liu Y, Huang QH, Liu WL, *et al.* Establishment of VCA and EBNA1 IgA-based combination by enzyme-linked immunosorbent assay as preferred screening method for nasopharyngeal carcinoma: a two-stage design with a preliminary performance study and a mass screening in southern China. *Int J Cancer* 2012;131:406–16.
17. Liu ZW, Ji MF, Huang QH, *et al.* Two Epstein-Barr virus-related serologic antibody tests in nasopharyngeal carcinoma screening: results from the initial phase of a cluster randomized controlled trial in Southern China. *Am J Epidemiol*

1  
2  
3 2013;177:242–50.

4 18. Department of disease prevention and control, Ministry of health, China. Technical  
5 proposal for early diagnosis and treatment of cancer (2011) (Chinese). Peking:  
6 People's Medical Publishing House (PMPH) 2011:144-71.

7 19. Tang JW, Rohwader E, Chu IM, *et al.* Evaluation of EpsteinBarr virus  
8 antigen-based immunoassays for serological diagnosis of nasopharyngeal carcinoma.  
9 *J Clin Virol* 2007;40:284–8.

10 20. Middeldorp JM. Epstein-Barr virus-specific humoral immune responses in health  
11 and disease. *Curr Top Microbiol Immunol* 2015;391:289–323.

12 21. Mao YP, Li WF, Chen L, *et al.* A clinical verification of the Chinese 2008 staging  
13 system for nasopharyngeal carcinoma (in Chinese). *Ai Zheng* 2009;28:1022–8.

14 22. Obuchowski N. Testing for equivalence of diagnostic tests. *Am J Radiol*  
15 1997;168:13–7.

16 23. Liu JP, Ma MCh, Wu ChY, *et al.* Tests of equivalence and noninferiority for  
17 diagnostic accuracy based on the paired areas under ROC curve. *Statist Med*  
18 2006;25:1219–38.

19 24. Zhou XH, Obuchowski NA, McClish DK. *Statistical methods in diagnostic*  
20 *medicine*. New York: Wiley, 2002:188–92.

21 25. Chen WZ, Zhang JY. Application of non-inferiority test for diagnostic accuracy  
22 under the areas of ROC based on bootstrap approach and its macro programming  
23 development. *Modern Prev Med (Chinese)* 2010;37:3009–10.

24 26. Simel D, Samsa G, Matchar D. Likelihood ratios with confidence: sample size  
25 estimation for diagnostic test studies. *J Clin Epidemiol* 1991;44:763–70.

26 27. Fleiss JL. *Reliability of measurement*. New York: Wiley-Interscience, 1986:1–32.

27 28. Van Grunsven WM, Spaan WJ, Middeldorp JM. Localization and diagnostic  
28 application of immunodominant domains of the BFRF3-encoded Epstein-Barr virus  
29 capsid protein. *J Infect Dis* 1994;170:13–9.

30 29. Fachiroh J, Paramita DK, Hariwiyanto B, *et al.* Single assay combination of  
31 Epstein-Barr virus (EBV) EBNA1- and viral capsid antigen-p18-derived synthetic  
32 peptides for measuring anti-EBV Immunoglobulin G (IgG) and IgA antibody levels in  
33 sera from nasopharyngeal carcinoma patients: options for field screening. *J Clin*  
34 *Microbiol* 2006;44:1459–67.

35 30. Wei K, Xu Y, Liu J, *et al.* No incidence trends and no change in pathological  
36 proportions of nasopharyngeal carcinoma in Zhongshan in 1970–2007. *Asian Pacif J*  
37 *Cancer Prev* 2010;11:1595–9.

38 31. Pepe MS, Feng Z, Janes H, *et al.* Pivotal evaluation of the accuracy of a  
39 biomarker used for classification or prediction: standards for study design. *J Natl*  
40 *Cancer Inst* 2008;100:1432–8.

1  
2  
3  
4  
5  
6  
7  
8  
9  
10  
11  
12  
13  
14  
15  
16  
17  
18  
19  
20  
21  
22  
23  
24  
25  
26  
27  
28  
29  
30  
31  
32  
33  
34  
35  
36  
37  
38  
39  
40  
41  
42  
43  
44  
45  
46  
47  
48  
49  
50  
51  
52  
53  
54  
55  
56  
57  
58  
59  
60

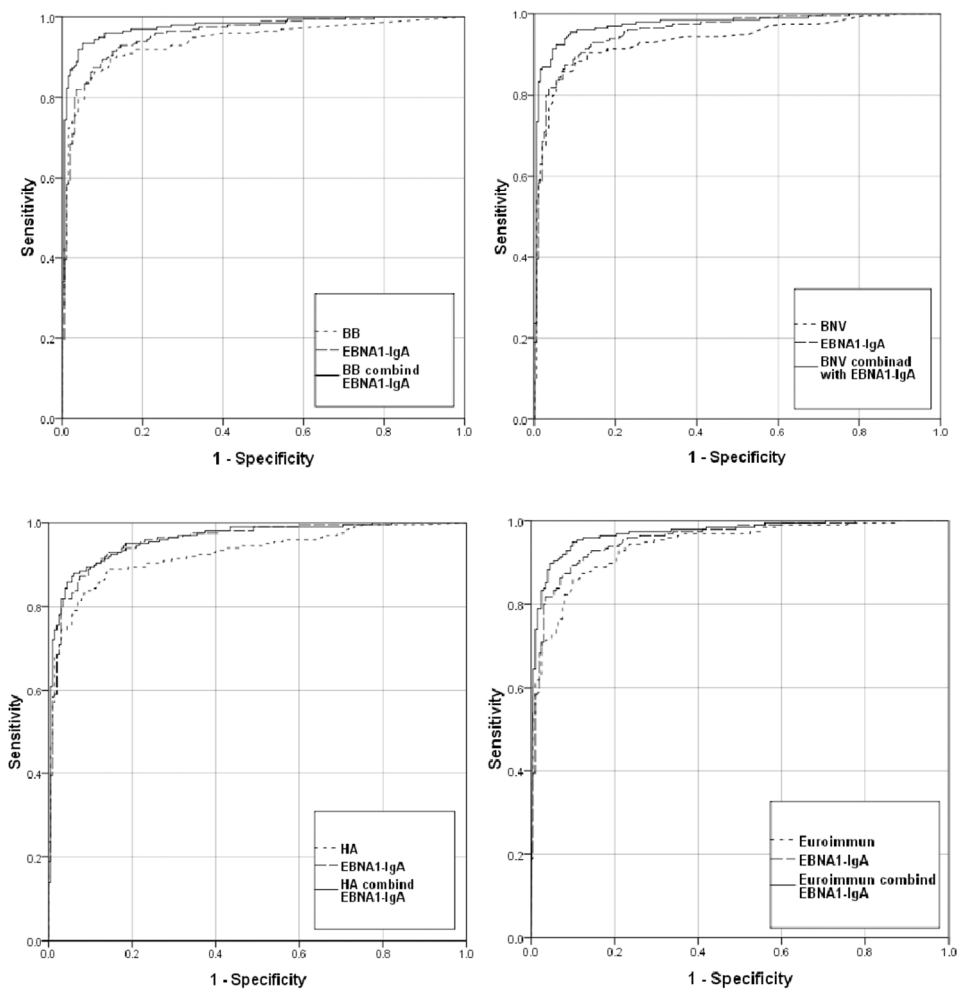

Figure1\_ROCs for BB, BNV, HA, Euroimmun and their combination with EBNA1-IgA

94x96mm (300 x 300 DPI)

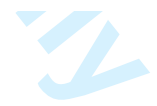



| Section & Topic          | No  | Item                                                                                                                                                   | Reported on page # |
|--------------------------|-----|--------------------------------------------------------------------------------------------------------------------------------------------------------|--------------------|
| <b>TITLE OR ABSTRACT</b> |     |                                                                                                                                                        |                    |
|                          | 1   | Identification as a study of diagnostic accuracy using at least one measure of accuracy (such as sensitivity, specificity, predictive values, or AUC)  | 1,2                |
| <b>ABSTRACT</b>          |     |                                                                                                                                                        |                    |
|                          | 2   | Structured summary of study design, methods, results, and conclusions (for specific guidance, see STARD for Abstracts)                                 | 2                  |
| <b>INTRODUCTION</b>      |     |                                                                                                                                                        |                    |
|                          | 3   | Scientific and clinical background, including the intended use and clinical role of the index test                                                     | 2,3                |
|                          | 4   | Study objectives and hypotheses                                                                                                                        | 3                  |
| <b>METHODS</b>           |     |                                                                                                                                                        |                    |
| <i>Study design</i>      | 5   | Whether data collection was planned before the index test and reference standard were performed (prospective study) or after (retrospective study)     | 4                  |
| <i>Participants</i>      | 6   | Eligibility criteria                                                                                                                                   | 4                  |
|                          | 7   | On what basis potentially eligible participants were identified (such as symptoms, results from previous tests, inclusion in registry)                 | 4                  |
|                          | 8   | Where and when potentially eligible participants were identified (setting, location and dates)                                                         | 4                  |
|                          | 9   | Whether participants formed a consecutive, random or convenience series                                                                                | 4                  |
| <i>Test methods</i>      | 10a | Index test, in sufficient detail to allow replication                                                                                                  | 4,5                |
|                          | 10b | Reference standard, in sufficient detail to allow replication                                                                                          | 4,5                |
|                          | 11  | Rationale for choosing the reference standard (if alternatives exist)                                                                                  | 4                  |
|                          | 12a | Definition of and rationale for test positivity cut-offs or result categories of the index test, distinguishing pre-specified from exploratory         | 5                  |
|                          | 12b | Definition of and rationale for test positivity cut-offs or result categories of the reference standard, distinguishing pre-specified from exploratory | 5                  |
|                          | 13a | Whether clinical information and reference standard results were available to the performers/readers of the index test                                 | 4,5                |
|                          | 13b | Whether clinical information and index test results were available to the assessors of the reference standard                                          | 4,5                |
| <i>Analysis</i>          | 14  | Methods for estimating or comparing measures of diagnostic accuracy                                                                                    | 5                  |
|                          | 15  | How indeterminate index test or reference standard results were handled                                                                                | 5                  |
|                          | 16  | How missing data on the index test and reference standard were handled                                                                                 | 5                  |
|                          | 17  | Any analyses of variability in diagnostic accuracy, distinguishing pre-specified from exploratory                                                      | 5                  |
|                          | 18  | Intended sample size and how it was determined                                                                                                         | 4,5                |
| <b>RESULTS</b>           |     |                                                                                                                                                        |                    |
| <i>Participants</i>      | 19  | Flow of participants, using a diagram                                                                                                                  | 5,6                |
|                          | 20  | Baseline demographic and clinical characteristics of participants                                                                                      | 5,6                |
|                          | 21a | Distribution of severity of disease in those with the target condition                                                                                 | 5,6                |
|                          | 21b | Distribution of alternative diagnoses in those without the target condition                                                                            | 5,6                |
|                          | 22  | Time interval and any clinical interventions between index test and reference standard                                                                 | 5,6                |
| <i>Test results</i>      | 23  | Cross tabulation of the index test results (or their distribution) by the results of the reference standard                                            | 6-9                |
|                          | 24  | Estimates of diagnostic accuracy and their precision (such as 95% confidence intervals)                                                                | 6-9                |
|                          | 25  | Any adverse events from performing the index test or the reference standard                                                                            | 6-9                |
| <b>DISCUSSION</b>        |     |                                                                                                                                                        |                    |
|                          | 26  | Study limitations, including sources of potential bias, statistical uncertainty, and generalisability                                                  | 11                 |
|                          | 27  | Implications for practice, including the intended use and clinical role of the index test                                                              | 9-11               |
| <b>OTHER INFORMATION</b> |     |                                                                                                                                                        |                    |
|                          | 28  | Registration number and name of registry                                                                                                               | 11                 |
|                          | 29  | Where the full study protocol can be accessed                                                                                                          | 11                 |
|                          | 30  | Sources of funding and other support; role of funders                                                                                                  | 11                 |

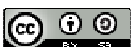

## STARD 2015

---

### AIM

STARD stands for “Standards for Reporting Diagnostic accuracy studies”. This list of items was developed to contribute to the completeness and transparency of reporting of diagnostic accuracy studies. Authors can use the list to write informative study reports. Editors and peer-reviewers can use it to evaluate whether the information has been included in manuscripts submitted for publication.

---

### EXPLANATION

A **diagnostic accuracy study** evaluates the ability of one or more medical tests to correctly classify study participants as having a **target condition**. This can be a disease, a disease stage, response or benefit from therapy, or an event or condition in the future. A medical test can be an imaging procedure, a laboratory test, elements from history and physical examination, a combination of these, or any other method for collecting information about the current health status of a patient.

The test whose accuracy is evaluated is called **index test**. A study can evaluate the accuracy of one or more index tests. Evaluating the ability of a medical test to correctly classify patients is typically done by comparing the distribution of the index test results with those of the **reference standard**. The reference standard is the best available method for establishing the presence or absence of the target condition. An accuracy study can rely on one or more reference standards.

If test results are categorized as either positive or negative, the cross tabulation of the index test results against those of the reference standard can be used to estimate the **sensitivity** of the index test (the proportion of participants *with* the target condition who have a positive index test), and its **specificity** (the proportion *without* the target condition who have a negative index test). From this cross tabulation (sometimes referred to as the contingency or “2x2” table), several other accuracy statistics can be estimated, such as the positive and negative **predictive values** of the test. Confidence intervals around estimates of accuracy can then be calculated to quantify the statistical **precision** of the measurements.

If the index test results can take more than two values, categorization of test results as positive or negative requires a **test positivity cut-off**. When multiple such cut-offs can be defined, authors can report a receiver operating characteristic (ROC) curve which graphically represents the combination of sensitivity and specificity for each possible test positivity cut-off. The **area under the ROC curve** informs in a single numerical value about the overall diagnostic accuracy of the index test.

The **intended use** of a medical test can be diagnosis, screening, staging, monitoring, surveillance, prediction or prognosis. The **clinical role** of a test explains its position relative to existing tests in the clinical pathway. A replacement test, for example, replaces an existing test. A triage test is used before an existing test; an add-on test is used after an existing test.

Besides diagnostic accuracy, several other outcomes and statistics may be relevant in the evaluation of medical tests. Medical tests can also be used to classify patients for purposes other than diagnosis, such as staging or prognosis. The STARD list was not explicitly developed for these other outcomes, statistics, and study types, although most STARD items would still apply.

---

### DEVELOPMENT

This STARD list was released in 2015. The 30 items were identified by an international expert group of methodologists, researchers, and editors. The guiding principle in the development of STARD was to select items that, when reported, would help readers to judge the potential for bias in the study, to appraise the applicability of the study findings and the validity of conclusions and recommendations. The list represents an update of the first version, which was published in 2003.

More information can be found on <http://www.equator-network.org/reporting-guidelines/stard>.

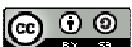

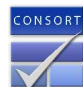

## CONSORT 2010 checklist of information to include when reporting a randomised trial\*

| Section/Topic                    | Item No | Checklist item                                                                                                                                                                              | Reported on page No |
|----------------------------------|---------|---------------------------------------------------------------------------------------------------------------------------------------------------------------------------------------------|---------------------|
| <b>Title and abstract</b>        |         |                                                                                                                                                                                             |                     |
|                                  | 1a      | Identification as a randomised trial in the title                                                                                                                                           | 1,2                 |
|                                  | 1b      | Structured summary of trial design, methods, results, and conclusions (for specific guidance see CONSORT for abstracts)                                                                     | 1,2                 |
| <b>Introduction</b>              |         |                                                                                                                                                                                             |                     |
| Background and objectives        | 2a      | Scientific background and explanation of rationale                                                                                                                                          | 2,3                 |
|                                  | 2b      | Specific objectives or hypotheses                                                                                                                                                           | 3                   |
| <b>Methods</b>                   |         |                                                                                                                                                                                             |                     |
| Trial design                     | 3a      | Description of trial design (such as parallel, factorial) including allocation ratio                                                                                                        | 3,4                 |
|                                  | 3b      | Important changes to methods after trial commencement (such as eligibility criteria), with reasons                                                                                          | 3,4                 |
| Participants                     | 4a      | Eligibility criteria for participants                                                                                                                                                       | 3,4                 |
|                                  | 4b      | Settings and locations where the data were collected                                                                                                                                        | 3,4                 |
| Interventions                    | 5       | The interventions for each group with sufficient details to allow replication, including how and when they were actually administered                                                       | 3,4                 |
| Outcomes                         | 6a      | Completely defined pre-specified primary and secondary outcome measures, including how and when they were assessed                                                                          | 3,4                 |
|                                  | 6b      | Any changes to trial outcomes after the trial commenced, with reasons                                                                                                                       | 3,4                 |
| Sample size                      | 7a      | How sample size was determined                                                                                                                                                              | 3,4                 |
|                                  | 7b      | When applicable, explanation of any interim analyses and stopping guidelines                                                                                                                | 3,4                 |
| <b>Randomisation:</b>            |         |                                                                                                                                                                                             |                     |
| Sequence generation              | 8a      | Method used to generate the random allocation sequence                                                                                                                                      | 4                   |
|                                  | 8b      | Type of randomisation; details of any restriction (such as blocking and block size)                                                                                                         | 4                   |
| Allocation concealment mechanism | 9       | Mechanism used to implement the random allocation sequence (such as sequentially numbered containers), describing any steps taken to conceal the sequence until interventions were assigned | 4                   |
| Implementation                   | 10      | Who generated the random allocation sequence, who enrolled participants, and who assigned participants to interventions                                                                     | 4                   |
| Blinding                         | 11a     | If done, who was blinded after assignment to interventions (for example, participants, care providers, those                                                                                | 4                   |

|    |                          |                                                                                                                     |      |
|----|--------------------------|---------------------------------------------------------------------------------------------------------------------|------|
| 1  |                          |                                                                                                                     |      |
| 2  |                          | assessing outcomes) and how                                                                                         |      |
| 3  |                          |                                                                                                                     |      |
| 4  |                          | 11b If relevant, description of the similarity of interventions                                                     | 5    |
| 5  | Statistical methods      | 12a Statistical methods used to compare groups for primary and secondary outcomes                                   | 5    |
| 6  |                          | 12b Methods for additional analyses, such as subgroup analyses and adjusted analyses                                | 5    |
| 7  |                          |                                                                                                                     |      |
| 8  | <b>Results</b>           |                                                                                                                     |      |
| 9  | Participant flow (a      | 13a For each group, the numbers of participants who were randomly assigned, received intended treatment, and        | 5-9  |
| 10 | diagram is strongly      | were analysed for the primary outcome                                                                               |      |
| 11 | recommended)             | 13b For each group, losses and exclusions after randomisation, together with reasons                                | 5-9  |
| 12 | Recruitment              | 14a Dates defining the periods of recruitment and follow-up                                                         | 8-9  |
| 13 |                          | 14b Why the trial ended or was stopped                                                                              | 8-9  |
| 14 |                          |                                                                                                                     |      |
| 15 | Baseline data            | 15 A table showing baseline demographic and clinical characteristics for each group                                 | 5,6  |
| 16 | Numbers analysed         | 16 For each group, number of participants (denominator) included in each analysis and whether the analysis was      | 5,6  |
| 17 |                          | by original assigned groups                                                                                         |      |
| 18 |                          |                                                                                                                     |      |
| 19 | Outcomes and             | 17a For each primary and secondary outcome, results for each group, and the estimated effect size and its           | 6-9  |
| 20 | estimation               | precision (such as 95% confidence interval)                                                                         |      |
| 21 |                          | 17b For binary outcomes, presentation of both absolute and relative effect sizes is recommended                     | 6-9  |
| 22 | Ancillary analyses       | 18 Results of any other analyses performed, including subgroup analyses and adjusted analyses, distinguishing       | 8-9  |
| 23 |                          | pre-specified from exploratory                                                                                      |      |
| 24 |                          |                                                                                                                     |      |
| 25 | Harms                    | 19 All important harms or unintended effects in each group (for specific guidance see CONSORT for harms)            | 8    |
| 26 |                          |                                                                                                                     |      |
| 27 | <b>Discussion</b>        |                                                                                                                     |      |
| 28 | Limitations              | 20 Trial limitations, addressing sources of potential bias, imprecision, and, if relevant, multiplicity of analyses | 11   |
| 29 | Generalisability         | 21 Generalisability (external validity, applicability) of the trial findings                                        | 9-11 |
| 30 | Interpretation           | 22 Interpretation consistent with results, balancing benefits and harms, and considering other relevant evidence    | 9-11 |
| 31 |                          |                                                                                                                     |      |
| 32 | <b>Other information</b> |                                                                                                                     |      |
| 33 | Registration             | 23 Registration number and name of trial registry                                                                   | 11   |
| 34 | Protocol                 | 24 Where the full trial protocol can be accessed, if available                                                      | 5,11 |
| 35 | Funding                  | 25 Sources of funding and other support (such as supply of drugs), role of funders                                  | 11   |
| 36 |                          |                                                                                                                     |      |

37

38 \*We strongly recommend reading this statement in conjunction with the CONSORT 2010 Explanation and Elaboration for important clarifications on all the items. If relevant, we also

39 recommend reading CONSORT extensions for cluster randomised trials, non-inferiority and equivalence trials, non-pharmacological treatments, herbal interventions, and pragmatic trials.

40 Additional extensions are forthcoming: for those and for up to date references relevant to this checklist, see [www.consort-statement.org](http://www.consort-statement.org).

41

42

# BMJ Open

## Evaluation of seven recombinant VCA-IgA ELISA kits for the diagnosis of nasopharyngeal carcinoma in China: a case-control trial

|                                 |                                                                                                                                                                                                                                                                                                                                                                                                                                                                                                                                                                                                                                                                                                                                                                                                                                                                                                                                                                                                                                                                                                                                                                                                                                                                                                                                                                                                                                                                                                                                                                                                                                                                                                                                                                                                                                                                                                                  |
|---------------------------------|------------------------------------------------------------------------------------------------------------------------------------------------------------------------------------------------------------------------------------------------------------------------------------------------------------------------------------------------------------------------------------------------------------------------------------------------------------------------------------------------------------------------------------------------------------------------------------------------------------------------------------------------------------------------------------------------------------------------------------------------------------------------------------------------------------------------------------------------------------------------------------------------------------------------------------------------------------------------------------------------------------------------------------------------------------------------------------------------------------------------------------------------------------------------------------------------------------------------------------------------------------------------------------------------------------------------------------------------------------------------------------------------------------------------------------------------------------------------------------------------------------------------------------------------------------------------------------------------------------------------------------------------------------------------------------------------------------------------------------------------------------------------------------------------------------------------------------------------------------------------------------------------------------------|
| Journal:                        | <i>BMJ Open</i>                                                                                                                                                                                                                                                                                                                                                                                                                                                                                                                                                                                                                                                                                                                                                                                                                                                                                                                                                                                                                                                                                                                                                                                                                                                                                                                                                                                                                                                                                                                                                                                                                                                                                                                                                                                                                                                                                                  |
| Manuscript ID                   | bmjopen-2016-013211.R1                                                                                                                                                                                                                                                                                                                                                                                                                                                                                                                                                                                                                                                                                                                                                                                                                                                                                                                                                                                                                                                                                                                                                                                                                                                                                                                                                                                                                                                                                                                                                                                                                                                                                                                                                                                                                                                                                           |
| Article Type:                   | Research                                                                                                                                                                                                                                                                                                                                                                                                                                                                                                                                                                                                                                                                                                                                                                                                                                                                                                                                                                                                                                                                                                                                                                                                                                                                                                                                                                                                                                                                                                                                                                                                                                                                                                                                                                                                                                                                                                         |
| Date Submitted by the Author:   | 01-Feb-2017                                                                                                                                                                                                                                                                                                                                                                                                                                                                                                                                                                                                                                                                                                                                                                                                                                                                                                                                                                                                                                                                                                                                                                                                                                                                                                                                                                                                                                                                                                                                                                                                                                                                                                                                                                                                                                                                                                      |
| Complete List of Authors:       | Gao, Rui; Sun Yat-sen University Cancer Center, State Key Laboratory of Oncology in Southern China, Department of Cancer Prevention; Sun Yat-Sen University, School of Public Health<br>Wang, Lin; Sun Yat-sen University Cancer Center, State Key Laboratory of Oncology in Southern China, Department of Nasopharyngeal Carcinoma<br>Zhang, Lifang; Guangzhou Women and Children's Medical Center, Division of Birth Cohort Study<br>Ye, Yanfang; Sun Yat-Sen University, Sun Yat-sen Memorial Hospital<br>Xie, Shanghang; Sun Yat-sen University Cancer Center, State Key Laboratory of Oncology in Southern China, Department of Cancer Prevention<br>Du, Jinlin; Sun Yat-sen University Cancer Center, State Key Laboratory of Oncology in Southern China, Department of Cancer Prevention; Sun Yat-Sen University, School of Public Health<br>Chen, Suihong; Sun Yat-sen University Cancer Center, State Key Laboratory of Oncology in Southern China, Department of Cancer Prevention; Sun Yat-Sen University, School of Public Health<br>Guo, Jie; Sun Yat-sen University Cancer Center, State Key Laboratory of Oncology in Southern China, Department of Cancer Prevention; Sun Yat-Sen University, School of Public Health<br>Yang, Mengjie ; Sun Yat-sen University Cancer Center, State Key Laboratory of Oncology in Southern China, Department of Cancer Prevention; Sun Yat-Sen University, School of Public Health<br>Lin, Chuyang; Sun Yat-sen University Cancer Center, State Key Laboratory of Oncology in Southern China, Department of Cancer Prevention; Sun Yat-Sen University, School of Public Health<br>Liu, Qing; Sun Yat-sen University Cancer Center, State Key Laboratory of Oncology in Southern China, Department of Cancer Prevention<br>Cao, Sumei; Sun Yat-sen University Cancer Center, State Key Laboratory of Oncology in Southern China, Department of Cancer Prevention |
| <b>Primary Subject Heading</b>: | Oncology                                                                                                                                                                                                                                                                                                                                                                                                                                                                                                                                                                                                                                                                                                                                                                                                                                                                                                                                                                                                                                                                                                                                                                                                                                                                                                                                                                                                                                                                                                                                                                                                                                                                                                                                                                                                                                                                                                         |
| Secondary Subject Heading:      | Diagnostics, Epidemiology, Research methods                                                                                                                                                                                                                                                                                                                                                                                                                                                                                                                                                                                                                                                                                                                                                                                                                                                                                                                                                                                                                                                                                                                                                                                                                                                                                                                                                                                                                                                                                                                                                                                                                                                                                                                                                                                                                                                                      |
| Keywords:                       | Nasopharyngeal carcinoma, Epstein-Barr virus, VCA-IgA, Diagnostic effect, Screening                                                                                                                                                                                                                                                                                                                                                                                                                                                                                                                                                                                                                                                                                                                                                                                                                                                                                                                                                                                                                                                                                                                                                                                                                                                                                                                                                                                                                                                                                                                                                                                                                                                                                                                                                                                                                              |
|                                 |                                                                                                                                                                                                                                                                                                                                                                                                                                                                                                                                                                                                                                                                                                                                                                                                                                                                                                                                                                                                                                                                                                                                                                                                                                                                                                                                                                                                                                                                                                                                                                                                                                                                                                                                                                                                                                                                                                                  |

1  
2  
3  
4  
5  
6  
7  
8  
9  
10  
11  
12  
13  
14  
15  
16  
17  
18  
19  
20  
21  
22  
23  
24  
25  
26  
27  
28  
29  
30  
31  
32  
33  
34  
35  
36  
37  
38  
39  
40  
41  
42  
43  
44  
45  
46  
47  
48  
49  
50  
51  
52  
53  
54  
55  
56  
57  
58  
59  
60

SCHOLARONE™  
Manuscripts

For peer review only

## Evaluation of seven recombinant VCA-IgA ELISA kits for the diagnosis of nasopharyngeal carcinoma in China: a case-control trial

Rui Gao<sup>1,2\*</sup>, Lin Wang<sup>3\*</sup>, Li-Fang Zhang<sup>4</sup>, Yan-Fang Ye<sup>5</sup>, Shang-Hang Xie<sup>1</sup>, Jin-Lin Du<sup>1,2</sup>, Sui-Hong Chen<sup>1,2</sup>, Jie Guo<sup>1,2</sup>, Meng-Jie Yang<sup>1,2</sup>, Chu-yang Lin<sup>1,2</sup>, Qing liu<sup>1#</sup>, Su-Mei Cao<sup>1#</sup>

<sup>1</sup>Department of Cancer Prevention, Sun Yat-sen University Cancer Center, State Key Laboratory of Oncology in Southern China, Guangzhou, 510060, P.R. China;

<sup>2</sup>School of Public Health, Sun Yat-Sen University, Guangzhou, 510060, P.R. China;

<sup>3</sup>Department of Nasopharyngeal Carcinoma, Sun Yat-sen University Cancer Center, State Key Laboratory of Oncology in Southern China, Guangzhou, 510060, P.R. China;

<sup>4</sup>Division of Birth Cohort Study, Guangzhou Women and Children's Medical Center, Guangzhou, 510623, P.R. China;

<sup>5</sup>Sun Yat-sen Memorial Hospital, Sun Yat-sen University, Guangzhou, 510120, P.R. China.

\*These authors contributed equally to this work.

### #Correspondence to

Prof. Su-Mei Cao, caosm@sysucc.org.cn;

Prof. Qing Liu, liuqing@sysucc.org.cn

### Authors' E-mail:

Rui Gao: gaor5@mail2.sysu.edu.cn

Lin Wang: wangl1@sysucc.org.cn

Li-Fang Zhang: lifanglydia@hotmail.com

Yan-Fang Ye: yeyanfang1@gmail.com

Shang-Hang Xie: xieshh@sysucc.org.cn

Jin-Lin Du: dujl3@mail2.sysu.edu.cn

Sui-Hong Chen: chensh43@mail2.sysu.edu.cn

Jie Guo: guojiegina@126.com

Meng-Jie Yang: yangmj@sysucc.org.cn

Chu-yang Lin: linchy23@mail2.sysu.edu.cn

### Preferred reviewers:

1. Fang Fang, Fang.Fang@ki.se, Department of Medical Epidemiology and Biostatistics, Karolinska Institutet, Stockholm, Sweden.
2. Liming Liang, lliang@hsph.harvard.edu, Departments of Epidemiology and Biostatistics, Harvard School of Public Health, Boston, MA, US.
3. Qing Chen, qingchen@fimmu.com, Department of Epidemiology, School of Public Health and Tropical Medicine, Southern Medical University, Guangzhou, China

**Key words:** Nasopharyngeal carcinoma, Epstein-Barr virus, VCA-IgA, Diagnostic effect, Screening

Word count: 2695

## ABSTRACT

**Objective:** Seven recombinant VCA-IgA ELISA kits are widely used in China, but their diagnostic effects have not been evaluated. In this study, we evaluated whether the diagnostic effects of these kits are similar to those of the standard kit (EUROIMMUN, Lübeck, Germany).

**Methods:** A diagnostic case-control trial was conducted, with 200 cases of nasopharyngeal carcinoma (NPC) and 200 controls from NPC-endemic areas in southern China. The areas under the curve (AUCs), the sensitivities and the specificities of testing kits were compared with those of the standard kit. The test-retest reliability of each kit was determined by intraclass correlation coefficient (ICC). Their diagnostic accuracy in combination with EBNA1-IgA was also evaluated in logistic models.

**Results:** Three testing kits – KSB, BB and HA – showed diagnostic accuracy equal to that of the standard kit, with good performance in the AUCs (0.926~0.945), and no significant differences in sensitivity were found between early- and advanced-stage NPCs. ICCs exceeded 0.8. Three logistic regression models were built, and the AUCs of these models (0.961~0.977) were better than those of the individual VCA-IgA kits. All new models had diagnostic accuracy equal to that of the standard kit. New cutoff values of these three kits and their corresponding combinations for researchers to replicate and use in NPC early detection and screening in the future were provided.

**Conclusions:** Three recombinant VCA-IgA kits – KSB, BB and HA – had diagnostic effects equal to those of the standard kit, and, in combination with EBNA1-IgA in logistic regression models, can be used in future screening for NPC.

### Strengths and limitations of this study

- This is the first study to carry out a comprehensive evaluation of recombinant commercial diagnostic VCA-IgA (ELISA) kits in China, and logistic models combining VCA-IgA with EBNA1-IgA were established.
- New cutoff values for VCA-IgA kits and their corresponding combinations for researchers to replicate and use in NPC early detection and screening in the future were provided.
- All cases and controls were from NPC-endemic areas of southern China, and thus these results might not be applicable to other populations.
- Cutoff values for NPC screening by means of these models described in this study must be verified in prospective mass screening.

## INTRODUCTION

Nasopharyngeal carcinoma (NPC) is a common form of squamous-cell carcinoma in southern China and southeastern Asia. The annual incidence rate of NPC in southern China can reach 25 per 100,000 person-years, which is about 25-fold higher than in the rest of the world.<sup>1-4</sup> NPC is a complex disease caused by a combination of Epstein-Barr virus (EBV), chronic infection, the environment and host genes in a



1  
2  
3 multi-step process of carcinogenesis, but until now there have been no effective  
4 preventive measures.<sup>5-9</sup> Long-term survival rates differ substantially between patients  
5 with advanced- (stages III and IV) and early- (stages I and II) stage NPC. Four-year  
6 survival rates of early-stage NPC patients are 96.7% compared with 67.1% for those  
7 with advanced-stage NPC.<sup>5</sup> Mass screening has become the most practical method for  
8 improved early detection in and overall prognosis of NPC patients in the endemic  
9 areas.<sup>10 11</sup>

12  
13 Serum antibodies against EBV-related antigens, especially immunoglobulin A (IgA)  
14 against viral capsid antigen (VCA-IgA), early antigen (EA-IgA), EBV nuclear antigen  
15 1 (EBNA1-IgA) and so on, remain elevated for an average of 38 months in the  
16 preclinical phase,<sup>9-14</sup> and serological tests for these markers are simple and  
17 inexpensive.<sup>15-18</sup> Therefore, since the 1970s, these tests have been used as screening  
18 markers for NPC in endemic areas. In our previous study, we evaluated the diagnostic  
19 performance of seven commercial EBV-related antibodies by enzyme-linked  
20 immunosorbent assay (ELISA) and found EBNA1-IgA (Zhongshan Biotech, China)  
21 and VCA-IgA (EUROIMMUN, Lübeck, Germany) ELISA to be the top two  
22 seromarkers, with AUCs of 0.95 (95%CI, 0.93-0.97) and 0.94 (95%CI, 0.92-0.97),  
23 respectively.<sup>16</sup> We further verified that the combination of VCA-IgA and EBNA1-IgA  
24 outperformed any individual EBV seromarkers, with AUC up to 0.97 (95%CI, 0.96,  
25 0.99).<sup>15-17</sup> Thus, since 2011, the combination of VCA-IgA and EBNA1-IgA has been  
26 recommended as the standard tool for NPC screening in China.<sup>18</sup>

27  
28  
29  
30  
31  
32 Nowadays, several kinds of commercial VCA-IgA kits based on recombinant peptides  
33 have been developed in China and are presently widely used for the early detection of  
34 and screening for NPC. However, their diagnostic performance for NPC alone and in  
35 combination with EBNA1-IgA has not been evaluated. In this study, we evaluated  
36 whether the effects of the NPC-diagnostic kits are comparable with those of the  
37 standard VCA-IgA kit and can be substituted for it. If so, we will further explore the  
38 combination diagnostic strategy with EBNA1-IgA for the early detection of and mass  
39 screening for NPC.  
40  
41  
42  
43  
44

## 45 **METHODS**

### 46 **Study population**

47 Serum specimens were continuously collected from 200 patients hospitalised with  
48 NPC in the Sun Yat-sen University Cancer Center (SYSUCC) from January  
49 2013 to June 2013. These cases were histologically confirmed by biopsy, and the  
50 clinical stages were classified according to the 2009 Union for International Cancer  
51 Control (UICC) criteria, including 33 patients with early-stage NPC (stages I, II) and  
52 167 with advanced-stage NPC (stages III, IV). The inclusion criteria included being  
53 between 30 and 59 years of age and residing in one of the six high-endemic provinces  
54 of southern China (Guangdong, Guangxi, Jiangxi, Hunan, Fujian or Hainan Province).  
55 Other information, including demographic data, smoking, drinking histories and  
56  
57  
58  
59  
60

family history of NPC, was collected by the physician in charge. All serum samples were collected before treatment.

The 200 healthy controls were randomly selected from among healthy people who participated in physical examinations at the Sihui Cancer Center (Sihui City, Guangdong Province, China) from July 2013 to September 2013 and were frequency-matched with cases by age (5-year age groups) and gender. All participants completed a short questionnaire to record demographic data, smoking, drinking histories and family history of NPC and donated 3 mL of blood.

This study was approved by the Clinical Research Ethics Committee of the SYSUCC (YB2015-029-01), and all participants provided written informed consent.

### Detection of serological EBV antibodies

Serum and buffy coat were separated less than 4 hours after collection and stored at  $-80^{\circ}\text{C}$  before being tested. None of the specimens was hemolytic or repeatedly frozen more than twice. Seven recombinant VCA-IgA kits, the standard VCA-IgA kit (EUROIMMUN) and the standard EBNA1-IgA kit (Zhongshan) were tested (table 1).

**Table 1** Product information for eight brands of VCA-IgA kits and the EBNA1-IgA kit

| Abbreviation for kits | Manufacturer                                     |
|-----------------------|--------------------------------------------------|
| VCA-IgA               |                                                  |
| KSB                   | Shenzhen Kang Sheng Bao Bio-Technology Co., Ltd. |
| BNV                   | Bioneovan Co., Ltd.                              |
| GBI                   | Beijing BGI-GBI Biotech Co., Ltd.                |
| BB                    | Beijing Beier Bioengineering Co., Ltd.           |
| HA                    | Shenzhen HuianBioscience Co., Ltd.               |
| HK                    | Shen Zhen HuaKang Co., Ltd.                      |
| ZS                    | ZhongShan Biotech Co., Ltd.                      |
| EUROIMMUN             | EUROIMMUN Medizinische Labordiagnostika AG       |
| EBNA1-IgA             | ZhongShan Biotech Co., Ltd.                      |

All samples were renumbered and tested blindly by one technician according to the manufacturers' instructions. Levels of antibodies were assessed by photometric measurement, which provided optical density (OD) values. Reference ODs (rOD) were obtained according to manufacturers' instructions by dividing OD values by a reference control. To investigate the test-retest reliability of each kit, 10% serum samples (40 samples) were randomly chosen and retested.

### Statistical analysis

Demographic characteristics and NPC risk factors between cases and controls were compared by chi-squared tests. The cutoff value of each single kit was defined with

the largest Youden Indices (sensitivity+specificity-1) chosen from each receiver operating characteristic (ROC). The diagnostic efficacy of each kit was evaluated by AUC, and non-inferiority tests based on the bootstrap approach were performed to determine whether the AUCs of these recombinant testing kits were inferior to that of the standard kit (let  $\Delta=0.05$  be the pre-determined clinically meaningful equivalence limit).<sup>19-22</sup> The sensitivity and specificity of each kit were calculated, and their 95% confidence intervals (CIs) were estimated by the methods of Simel and colleagues.<sup>23</sup> Differences in sensitivities between early- and advanced-stage NPC with each kit were compared by Chi-squared tests (Fisher's exact test and McNemar's test will be specified while others Chi-squared tests means Person's Chi-square test). Intraclass correlation coefficients (ICC) were performed to determine test-retest reliability.

In order to prevent bias and study the virus factor only, we matched the baseline covariates (gender and age) and some of the important NPC risk factors (smoking, drinking and NPC history). Binary unconditional logistic regressions were used to establish formulae for VCA-IgA and EBNA1-IgA. The diagnostic efficacy of each formula was evaluated by sensitivity, specificity and AUC, compared with the standard formula,  $Logit P = -3.934 + 2.203VCA-IgA (EUROIMMUN) + 4.797EBNA1-IgA$ . The cutoff p-value in the corresponding logistic regression for distinguishing between NPC cases and controls was defined with the largest Youden Index chosen from each ROC. Two minimally acceptable false-positive rates (1-Specificity), 3% and 7%, were used empirically to establish the cutoff p-values for classifying different NPC risk subgroups.<sup>16 17</sup>

The non-inferiority tests were one-sided, and  $p>0.05$  was considered to be non-inferior. Other tests were two-sided, and  $p<0.05$  was considered to be statistically significant. Data were analyzed by SAS9.2 and SPSS16.0 software.

## RESULTS

### Baseline information

Baseline information on gender, age, smoking, drinking and NPC family history was comparable between cases and controls, and no statistically significant differences were found between them. Further, there were no statistically significant differences for these items between early- and advanced-stage cases (table 2).

**Table 2** Demographic characteristics of NPC cases and controls

| Categories | NPC Cases (N <sub>1</sub> =200) No. (%) |                           |                         | Controls<br>(N <sub>2</sub> =200)<br>No. (%) | p <sup>5</sup> |
|------------|-----------------------------------------|---------------------------|-------------------------|----------------------------------------------|----------------|
|            | Early stage<br>(n=33)                   | Advanced stage<br>(n=167) | Total<br>p <sup>4</sup> |                                              |                |
| Gender     |                                         |                           | 0.472                   |                                              | 0.417          |
| Male       | 27 (81.8)                               | 127 (76.0)                | 154 (77.0)              | 147 (73.5)                                   |                |

|                                 |           |            |            |            |       |
|---------------------------------|-----------|------------|------------|------------|-------|
| Female                          | 6 (18.2)  | 40 (24.0)  | 46 (23.0)  | 53 (26.5)  |       |
| Age (years)                     |           |            | 0.299      |            | 0.785 |
| 30~                             | 6 (18.2)  | 47 (28.1)  | 53 (26.5)  | 47 (23.5)  |       |
| 40~                             | 13 (39.4) | 70 (41.9)  | 83 (41.5)  | 87 (43.5)  |       |
| 50~                             | 14 (42.4) | 50 (29.9)  | 64 (32.0)  | 66 (33.0)  |       |
| Smoking <sup>1</sup>            |           |            | 0.857      |            | 0.746 |
| Yes                             | 11 (33.3) | 53 (31.7)  | 64 (32.0)  | 61 (30.5)  |       |
| No                              | 22 (66.7) | 114 (68.3) | 136 (68.0) | 139 (69.5) |       |
| Drinking <sup>2</sup>           |           |            | 0.641      |            | 0.494 |
| Yes                             | 6 (18.2)  | 25 (15.0)  | 31 (15.5)  | 27 (13.5)  |       |
| No                              | 27 (81.8) | 142 (85.0) | 169 (84.5) | 173 (86.5) |       |
| NPC family history <sup>3</sup> |           |            | 0.732      |            | 0.224 |
| Yes                             | 3 (9.1)   | 13 (7.8)   | 16 (8.0)   | 10 (5.0)   |       |
| No                              | 30 (90.9) | 154 (92.2) | 184 (92.0) | 190 (95.0) |       |

<sup>1</sup>'Smoking' refers to people who smoked more than one cigarette every three days within half a year and included current and former smokers. <sup>2</sup>'Drinking' refers to people who consumed alcoholic beverages every week within half a year and included current and former drinkers. <sup>3</sup>'NPC family history' refers to people whose parents, children and siblings have or did have NPC. <sup>4</sup>Differences in early- and advanced-stage NPC were compared by chi-squared tests (Fisher's Exact Test for NPC family history). \*p<0.05 was considered as statistically significant. <sup>5</sup>Differences in NPC Cases and Controls were compared by chi-squared tests. \*p<0.05 was considered as statistically significant.

### The diagnostic accuracies of eight brands of VCA-IgA kits and the EBNA1-IgA kit

Table 3 shows that the AUCs of four kits – KSB, BB, BNV and HA – were as high as that of the standard VCA-IgA kit (AUC, 0.942; 95%CI, 0.920-0.964). The AUCs, in order, were 0.945 for KSB (95%CI 0.925-0.966), 0.940 for BB (95%CI 0.916-0.964), 0.936 for BNV (95%CI 0.911-0.961) and 0.926 for HA (95%CI 0.900-0.953). In addition, the AUCs of GBI, HK and ZS were lower than that of the standard kit. Furthermore, no significant differences were found between early- and advanced-stage NPC in the sensitivities of six kits (p>0.05), except for BNV (p=0.044).

**Table 3** The diagnostic accuracies of eight brands of VCA-IgA kits and the EBNA1-IgA kit in distinguishing between NPC cases and controls

| Kits    | Cutoff values <sup>1</sup> | Sensitivity (%)     |                                     |               | Specificity (%)  | AUC (95%CI) | P <sup>3</sup> |
|---------|----------------------------|---------------------|-------------------------------------|---------------|------------------|-------------|----------------|
|         |                            | Early stage (95%CI) | Advanced stage (95%CI) <sup>2</sup> | Total (95%CI) | Control (95% CI) |             |                |
| VCA-IgA |                            |                     |                                     |               |                  |             |                |

|           |       |                        |                      |                     |                     |                        |        |
|-----------|-------|------------------------|----------------------|---------------------|---------------------|------------------------|--------|
| BB        | 0.58  | 75.8<br>(69.8-81.7)    | 88.6<br>(84.2-93.0)  | 86.5<br>(81.8-91.2) | 92.0<br>(88.2-95.8) | 0.940<br>(0.916-0.964) | 0.002  |
| BNV       | 0.923 | 72.7<br>(66.6-78.9)    | 88.0<br>(83.5-92.5)* | 86.0<br>(81.2-90.8) | 93.5<br>(90.1-96.9) | 0.936<br>(0.911-0.961) | 0.003  |
| GBI       | 0.825 | 72.7<br>(66.6-78.9)    | 76.6<br>(70.8-82.5)  | 76.0<br>(70.1-81.9) | 92.0<br>(88.2-95.8) | 0.899<br>(0.868-0.930) | 0.341* |
| HA        | 0.884 | 93.9<br>(90.6-97.2)    | 88.0<br>(83.5-92.5)  | 89.0<br>(84.7-93.3) | 86.0<br>(81.2-90.8) | 0.926<br>(0.900-0.953) | 0.012  |
| HK        | 1.218 | 81.8<br>(76.5-87.2)    | 83.2<br>(78.1-88.4)  | 83.0<br>(77.8-88.2) | 89.5<br>(85.3-93.7) | 0.913<br>(0.884-0.942) | 0.075* |
| KSB       | 0.283 | 100.0<br>(100.0-100.0) | 86.8<br>(82.1-91.5)  | 89.0<br>(84.7-93.3) | 87.5<br>(82.9-92.1) | 0.945<br>(0.925-0.966) | 0.000  |
| ZS        | 0.418 | 75.8<br>(69.8-81.7)    | 74.3<br>(68.2-80.3)  | 74.5<br>(68.5-80.5) | 87.5<br>(82.9-92.1) | 0.868<br>(0.831-0.904) | 0.878* |
| EUROIMMUN | 1.561 | 87.9<br>(83.4-92.4)    | 85.6<br>(80.8-90.5)  | 86.0<br>(81.2-90.8) | 90.0<br>(85.8-94.2) | 0.942<br>(0.921-0.964) |        |
| EBNA1-IgA | 1.203 | 93.9<br>(90.6-97.2)    | 86.2<br>(81.5-91.0)  | 87.5<br>(82.9-92.1) | 92.5<br>(88.8-96.2) | 0.956<br>(0.937-0.975) | 0.000  |

<sup>1</sup>Cutoff value for NPC diagnosis was defined as the value with the largest Youden Index chosen from each ROC.

<sup>2</sup>Differences in the sensitivities of early- and advanced-stage NPC were compared by Person Chi-Squared tests.

\*p<0.05 was considered as statistically significant. <sup>3</sup>p values were estimated by non-inferiority tests based on the bootstrap approach for AUC between EUROIMMUN and other kits. \*p<0.05 was considered as statistically significant while p>0.05 was considered to be inferior to the standard kit.

### The test–retest reliabilities of eight brands of VCA-IgA kits and the EBNA1-IgA kit

Ten percent serum samples (40 samples) were randomly chosen and retested for calculation of the ICC of each brand of kit, VCA-IgA or EBNA1-IgA. The test-retest reliabilities of all kits were excellent (>0.75, excellent) according to Fleiss's classification<sup>24</sup> (table 4).

**Table 4** The test–retest reliabilities of eight brands of VCA-IgA kits and the EBNA1-IgA kit

| Kits    | ICC*  | 95%CI       |
|---------|-------|-------------|
| VCA-IgA |       |             |
| BB      | 0.990 | 0.980-0.994 |
| BNV     | 0.982 | 0.967-0.991 |
| GBI     | 0.964 | 0.933-0.981 |
| HA      | 0.975 | 0.952-0.987 |
| HK      | 0.876 | 0.764-0.935 |
| KSB     | 0.823 | 0.666-0.906 |

|           |       |             |
|-----------|-------|-------------|
| ZS        | 0.978 | 0.958-0.988 |
| EUROIMMUN | 0.913 | 0.830-0.955 |
| EBNA1-IgA | 0.981 | 0.964-0.990 |

\*Less than 0.40- poor; Between 0.40 and 0.59- Fair;  
Between 0.60 and 0.74- good; Between 0.75 and 1.00- Excellent

### The diagnostic accuracies of the combinations of VCA-IgA and EBNA1-IgA with logistic models

We chose for testing three VCA-IgA kits with high AUCs, no differences in diagnoses for early- and advanced-stage NPC and excellent test-retest reliabilities, and then combined each with the EBNA1-IgA kit by logistic models. Three logistic regression models were established:

$$\text{Logit}P = -3.2323 + 0.8060\text{VCA-IgA (BB)} + 1.1044 \text{ EBNA1-IgA}$$

$$\text{Logit}P = -2.7591 + 0.6380\text{VCA-IgA (HA)} + 1.0620\text{EBNA1-IgA}$$

$$\text{Logit}P = -2.6039 + 0.5312\text{VCA-IgA (KSB)} + 1.1673 \text{ EBNA1-IgA}$$

In all these models, both VCA-IgA and EBNA1-IgA were statistically significant independent predictors of NPC risk ( $p < 0.05$ ), and the AUC of each combination was statistically significantly larger than that of each single VCA-IgA ( $p < 0.05$ ). The AUC of KSB increased from 0.945 (95%CI 0.925-0.966) to 0.964 (95%CI 0.947-0.981); BB increased from 0.940 (95%CI 0.916-0.964) to 0.977 (95%CI 0.963-0.991); and HA increased from 0.926 (95%CI 0.900-0.953) to 0.961 (95%CI 0.943-0.979) (figure 1).

Table 5 shows the diagnostic accuracies of the three new combinations and the standard combination [ $\text{Logit } P = -3.934 + 2.203\text{VCA-IgA (EUROIMMUN)} + 4.797\text{EBNA1-IgA}$ ] in distinguishing between NPC cases and controls. The AUCs of these three combinations were as high as that of the standard combination (AUC 0.970; 95%CI 0.956-0.985) ( $p < 0.05$ ). Furthermore, no statistically significant difference was found in the sensitivity of each combination between early- and advanced-stage NPC ( $p > 0.05$ ).

We used two minimally acceptable false-positive rates (1-Specificity) of 3% and 7% to define the high-risk and medium-risk cutoff values for the new combinations. The corresponding logistic regression p-values were 0.707 and 0.232 for BB, 0.766 and 0.364 for HA, 0.831 and 0.384 for KSB, and the corresponding true-positive rates (Sensitivities) were 88.0% and 93.5% for BB, 78.0% and 88.0% for HA and 79.0% and 87.5% for KSB.

**Table 5** The diagnostic accuracies of three new combinations and the standard combination in distinguishing between NPC cases and controls

| Combination | New cutoff | Sensitivity (%) |                |       | Specificity (%) | AUC (95%CI) | P <sup>3</sup> |
|-------------|------------|-----------------|----------------|-------|-----------------|-------------|----------------|
|             |            | Early stage     | Advanced stage | Total | Control         |             |                |

|                         | values <sup>1</sup> | (95%CI)             | (95%CI) <sup>2</sup> | (95%CI) <sup>3</sup> | (95% CI) <sup>4</sup> |                        |        |
|-------------------------|---------------------|---------------------|----------------------|----------------------|-----------------------|------------------------|--------|
| BB+EBNA1-IgA            | 0.258               | 97.0<br>(94.6-99.3) | 92.8<br>(89.2-96.4)  | 93.5<br>(90.1-96.9)  | 95.0<br>(92.0-98.0)   | 0.977<br>(0.963-0.991) | <0.001 |
| HA+EBNA1-IgA            | 0.379               | 97.0<br>(94.6-99.3) | 86.2<br>(81.5-91.0)  | 88.0<br>(83.5-92.5)  | 94.0<br>(90.7-97.3)   | 0.961<br>(0.943-0.979) | <0.001 |
| KSB+EBNA1-IgA           | 0.191               | 93.9<br>(90.6-97.2) | 94.6<br>(91.5-97.7)  | 94.5<br>(91.3-97.7)  | 87.0<br>(82.3-91.7)*  | 0.964<br>(0.947-0.981) | <0.001 |
| Standard<br>combination | 0.998               | 97.0<br>(94.6-99.3) | 88.6<br>(84.2-93.0)  | 90.0<br>(85.8-94.2)  | 95.5<br>(92.6-98.4)   | 0.970<br>(0.956-0.985) |        |

<sup>1</sup>New cutoff value for NPC diagnosis was defined as the value with the largest Youden Index chosen from each ROC. <sup>2</sup>Differences in the sensitivity of early- and advanced-stage NPC were compared by Person Chi-Squared tests. \*p<0.05 was considered as statistically significant. <sup>3</sup>p-values were estimated by non-inferiority tests based on the bootstrap approach for AUC between new combinations and the standard combination. \*p<0.05 was considered as statistically significant while p>0.05 was considered to be inferior to the standard kit.

## DISCUSSION

In our study, seven recombinant VCA-IgA kits were evaluated, and of these, KSB, BB and HA had diagnostic effects as good as those of the standard kit in terms of sensitivity, specificity and AUC. Combining VCA-IgA with EBNA1-IgA by logistic regression models increased the diagnostic accuracy of these three kits, and all combinations performed as well as the standard combination in sensitivity, specificity and AUC. This is the first study to carry out a comprehensive evaluation of recombinant commercial diagnostic VCA-IgA (ELISA) kits in China, and logistic models combining VCA-IgA with EBNA1-IgA were established. Furthermore, new cutoff values for these VCA-IgA kits and their corresponding combinations for researchers to replicate and use in NPC early detection and screening in the future were provided.

In this study, we first calculated the diagnostic performance of each brand of VCA/IgA kit. The AUC of the standard VCA-IgA kit (EUROIMMUN) was 0.942 (95%CI 0.920-0.964), which was consistent with results from our previous studies and verified that the diagnostic performance of VCA-IgA was good and stable.<sup>16 17</sup> We also found that the sensitivities, specificities and AUCs of three kits – KSB, BB and HA – were as high as those of the standard kit, and no significant differences in sensitivity were found between early- and advanced-stage NPC. Moreover, all test-retest reproducibilities were excellent (>0.75). These results suggested that these three kits had equal diagnostic effects and can be substituted for the standard kit. The costs of these recombinant commercial diagnostic kits were only half that of the standard kit, making them more cost-effective.

The EBV capsid antigen (VCA) is a late protein produced in the EBV lytic infection period. VCA contains a batch of capsid proteins, such as VCA-p18 (BFRF3),

1  
2  
3 VCA-p23 (BLRF2), gp125/110 (BALF4) and so on, which have unique immune  
4 dominants and virus-specific antigenic domains. These domains contain several small  
5 peptide regions (epitopes) which can be combined to form a powerful diagnostic  
6 reagent for VCA-IgA.<sup>25-26</sup> The capsid proteins in the EUROIMMUN kit<sup>27</sup> were  
7 extracted from the pyrolysis products of human B lymphocytes (P3HR1 cell line)  
8 infected by EBV and contained a combined native capsid protein of EBV. We noticed  
9 that, in contrast to the standard kit with a combined native capsid protein, these testing  
10 kits contain primarily recombinant p18 capsid proteins (VCA-p18). VCA-p18 is a  
11 small capsid protein that contains several small peptide regions (epitopes) which can  
12 be combined to form a powerful diagnostic reagent for VCA-IgA antibody  
13 responses.<sup>26</sup> Some researchers have reported that VCA-p18 is the major VCA antigen  
14 for IgA responses.<sup>26 28</sup> Our study showed that the AUCs of these VCA-p18  
15 recombinant kits were more than 0.85, and three of them had the same diagnostic  
16 effects as the standard kit, suggesting that, although the manufacturing processes of  
17 some recombinant VCA-p18 kits still need to be improved, some of the recombinant  
18 kits can be substituted for the standard kit for NPC diagnosis.

19  
20  
21  
22  
23  
24 As the serum antibody level (rOD) provides continuous data, the cutoff value for  
25 distinguishing between NPC cases and controls is critical for the early detection of  
26 and screening for NPC. A reasonable cutoff value can balance sensitivity and  
27 specificity. In the early detection of and screening for NPC, high sensitivity is  
28 required for the identification of high-risk individuals, and high specificity is required  
29 for reducing the rate of misdiagnosis and associated costs. According to the cutoff  
30 values provided by the kits' instructions, the sensitivities of testing kits were always  
31 too low, whilst their specificities were always too high. For example, the sensitivity  
32 and the specificity of KSB are 0.780 and 0.925, respectively, suggesting that the old  
33 cutoff values should be adjusted. We established new cutoff values for distinguishing  
34 between NPC cases and controls by Youdon Indices, and then obtained reasonable  
35 sensitivities and specificities. After adjustment, the new cutoff value for KSB is 0.283,  
36 and the sensitivity and specificity are 0.890 and 0.875, respectively. Moreover, no  
37 differences were found between sensitivities and specificities of these three kits –  
38 KSB, BB and HA – and those of the standard kit. There were also no statistically  
39 significant differences in the sensitivities of these three kits for early- and  
40 advanced-stage NPC.

41  
42  
43  
44  
45  
46  
47 As for the standard VCA, we found that the combinations of VCA-IgA and  
48 EBNA1-IgA by logistic models increased the diagnostic accuracy for NPC from less  
49 than 0.946 to more than 0.961 in AUCs. Sensitivities and specificities also increased.  
50 For example, the sensitivity and specificity of BB increased from 0.865 and 0.920 to  
51 0.935 and 0.955, respectively. VCA-IgA and EBNA1-IgA are two antibodies  
52 corresponding to EBV lytic-cycle proteins and latency gene products, respectively.  
53 Therefore, it is reasonable that host antibody responses for lytic-cycle and  
54 latency-associated EBV-related proteins can be complementary to each other in the  
55 diagnosis of NPC, and the combination of both could increase NPC diagnostic  
56  
57  
58  
59  
60



1  
2  
3 accuracy.<sup>11 29</sup> Furthermore, these three new combinations had diagnostic effects in  
4 sensitivities, specificities and AUCs equal to those of the standard combination,  
5 suggesting that the combinations of the three recombinant kits can be used for the  
6 early detection of and diagnostic screening for NPC. In this study, the control  
7 individuals came from NPC-endemic areas and belonged to a screening target  
8 population, so we attempted to define people at different risk levels by these new  
9 combinations for NPC screening. Compared with other common diseases, the NPC  
10 incidence rate in the screening target population was relatively low (about 50 per  
11 100,000 person-years)<sup>2 10 30</sup> Thus, it is important that the false-positive rate be small  
12 enough to avoid unnecessary fiberoptic endoscopy/biopsies and psychological stress  
13 for the NPC screening participants. Conversely, the true-positive rate (equal to  
14 sensitivity) should be acceptable.<sup>31</sup> We used two minimally acceptable false-positive  
15 rates of 3% and 7% as the high-risk and medium-risk cutoff values, respectively,<sup>17</sup> and  
16 the corresponding true-positive rates (sensitivities) for these three kits were 78.0% to  
17 88.0% and 87.5% to 93.5%,<sup>5</sup> respectively. If the baseline serologic results fulfilled the  
18 definition of high risk, the participants were referred for diagnostic examinations, and  
19 different screening intervals were assigned to the high-, medium- and low-risk groups.  
20 The screening intervals for these groups are 1, 1 and 4 years, respectively.<sup>17</sup>

21  
22 The study had some limitations. First, this study was a Single-center study and all  
23 cases and controls were from NPC-endemic areas of southern China (controls were  
24 from hospital); therefore, these results might not be applicable to other populations.  
25 Second, though we have confidence VCA-IgA in this study have the same  
26 sensitivities for detection of early and advanced stage NPC patients<sup>10 11 32</sup>, due to the  
27 low percentage (less than 20%) of early stage in clinic, we can only collect 33 early  
28 stage NPC participants in our study period. Third, it was a diagnostic trial in  
29 case-control design, and new cutoff values of these new schemes for NPC screening  
30 from this study must be verified in prospective mass screenings.

## 31 CONCLUSIONS

32 Three recombinant VCA-IgA kits – KSB, BB and HA – had diagnostic effects equal  
33 to those of the standard kit. They can be substituted for the standard kit, and their  
34 combinations could be used in the early detection of and screening for NPC.

35 **Contributors** Su-Mei Cao and Qing Liu obtained the funding. Rui Gao, Lin Wang  
36 and Li-Fang Zhang contributed to study conception and design; Rui Gao conducted  
37 experiments; Lin Wang, Yan-Fang Ye, Jin-Lin Du, Shang-Hang Xie, Sui-Hong Chen,  
38 Jie Guo and Meng-Jie Yang, Chu-yang Lin acquired or cleaned the data; Rui Gao  
39 analysed and interpreted the data; Rui Gao, Su-Mei Cao and Qing Liu drafted or  
40 revised the manuscript. All authors critically revised the manuscript for important  
41 intellectual content. All authors read and approved the final version of the manuscript.

42 **Funding** This work was supported by the National Natural Science Foundation (No.  
43 81373068) and the Special Fund for Public Health Trade (No. 201202014).

**Competing interests** The authors declare no conflicts of interest.

**Ethics approval** This study was approved by the Sun Yat-sen University Cancer Center IRB (YB2015-029-01).

**Data sharing statement** Technical appendix, statistical code, and dataset available from the corresponding author at caosm@sysucc.org.cn and liuqing@sysucc.org.cn.

## REFERENCES

1. Ma J, Cao S. The epidemiology of nasopharyngeal carcinoma. In: Lu JJ, Cooper JS, Lee AWM, eds. *Nasopharyngeal cancer*. Berlin: Springer, 2010:1–8.
2. Jia W-H, Huang Q-H, Liao J, *et al*. Trends in incidence and mortality of nasopharyngeal carcinoma over a 20–25 year period (1978/1983–2002) in Sihui and Cangwu counties in southern China. *BMC Cancer* 2006;6:178–85.
3. Chang ET, Adami HO. The enigmatic epidemiology of nasopharyngeal carcinoma. *Cancer Epidemiol Biomarkers Prev* 2006;15:1765–77.
4. Cao SM, Simons MJ, Qian CN. The prevalence and prevention of nasopharyngeal carcinoma in China. *Chinese J Cancer* 2011;30:114–9.
5. Sarmiento MP, Mejia MB. Preliminary assessment of nasopharyngeal carcinoma incidence in the Philippines: a second look at published data from four centers. *Chinese J Cancer* 2014;33:159–64.
6. Jia WH. Complex segregation analysis of nasopharyngeal carcinoma in Guangdong, China: evidence for a multifactorial mode of inheritance (complex segregation analysis of NPC in China). *Eur J Hum Genet* 2005;13:248–52.
7. Yu MC, Yuan JM. Epidemiology of nasopharyngeal carcinoma. *Semin Cancer Biol* 2002;12:421–29.
8. Xue WQ, Qin HD, Ruan HL, *et al*. Quantitative association of tobacco smoking with the risk of nasopharyngeal carcinoma: a comprehensive meta-analysis of studies conducted between 1979 and 2011. *Am J Epidemiol* 2013;178:325–38.
9. Chien YC, Chen JY, Liu MY, *et al*. Serologic markers of Epstein-Barr virus infection and nasopharyngeal carcinoma in Taiwanese men. *N Engl J Med* 2001;345:1877–82.
10. Cao SM, Liu Z, Jia WH, *et al*. Fluctuations of Epstein-Barr virus serological antibodies and risk for nasopharyngeal carcinoma: a prospective screening study with a 20-year follow-up. *PLoS One* 2011;6:e19100.
11. Zeng Y, Zhong JM, Li LY, *et al*. Follow-up studies on Epstein-Barr virus IgA/VCA antibody-positive persons in Zangwu County, China. *Intervirology* 1983;20:190–4.
12. Chen M, Liu M, Hsu S, *et al*. Use of bacterially expressed EBNA-1 protein cloned from a nasopharyngeal carcinoma (NPC) biopsy as a screening test for NPC patients. *J Med Virol* 2001;64:51–7.
13. Zong YS, Sham JS, Ng MH, *et al*. Immunoglobulin A against viral capsid antigen of Epstein-Barr virus and indirect mirror examination of the nasopharynx in the

- 1  
2  
3 detection of asymptomatic nasopharyngeal carcinoma. *Cancer* 1992;69:3–7.
- 4 14. Yi Z, Yuxi L, Chunren L, *et al.* Application of an immunoenzymatic method and  
5 an immunoradiographic method for a mass survey of nasopharyngeal carcinoma.  
6 *Intervirology* 1980;13:162–8.
- 7  
8 15. Tang B, Liu Q, Cui Y, *et al.* Protocols of screening, early detection and diagnosis  
9 for nasopharyngeal carcinoma. In: Dong Z, Qiao Y, eds. *Protocols of screening, early  
10 detection and diagnosis for cancer in P.R.China*. Beijing: People's Medical  
11 Publishing House of P.R. China, 2009:187–8.
- 12  
13 16. Liu Y, Huang QH, Liu WL, *et al.* Establishment of VCA and EBNA1 IgA-based  
14 combination by enzyme-linked immunosorbent assay as preferred screening method  
15 for nasopharyngeal carcinoma: a two-stage design with a preliminary performance  
16 study and a mass screening in southern China. *Int J Cancer* 2012;131:406–16.
- 17  
18 17. Liu ZW, Ji MF, Huang QH, *et al.* Two Epstein-Barr virus-related serologic  
19 antibody tests in nasopharyngeal carcinoma screening: results from the initial phase of  
20 a cluster randomized controlled trial in Southern China. *Am J Epidemiol*  
21 2013;177:242–50.
- 22  
23 18. Department of disease prevention and control, Ministry of health, China. Technical  
24 proposal for early diagnosis and treatment of cancer (2011) (Chinese). Peking:  
25 People's Medical Publishing House (PMPH) 2011:144-71.
- 26  
27 19. Obuchowski N. Testing for equivalence of diagnostic tests. *Am J Radiol*  
28 1997;168:13–7.
- 29  
30 20. Liu JP, Ma MCh, Wu ChY, *et al.* Tests of equivalence and noninferiority for  
31 diagnostic accuracy based on the paired areas under ROC curve. *Statist Med*  
32 2006;25:1219–38.
- 33  
34 21. Zhou XH, Obuchowski NA, McClish DK. *Statistical methods in diagnostic  
35 medicine*. New York: Wiley, 2002:188–92.
- 36  
37 22. Chen WZ, Zhang JY. Application of non-inferiority test for diagnostic accuracy  
38 under the areas of ROC based on bootstrap approach and its macro programming  
39 development. *Modern Prev Med (Chinese)* 2010;37:3009–10.
- 40  
41 23. Simel D, Samsa G, Matchar D. Likelihood ratios with confidence: sample size  
42 estimation for diagnostic test studies. *J Clin Epidemiol* 1991;44:763–70.
- 43  
44 24. Fleiss JL. *Reliability of measurement*. The design and analysis of clinical  
45 experiments, 1st edn. New York: Wiley-Interscience, 1986:1–32.
- 46  
47 25. Tang JW, Rohwader E, Chu IM, *et al.* Evaluation of Epstein-Barr virus  
48 antigen-based immunoassays for serological diagnosis of nasopharyngeal carcinoma.  
49 *J Clin Virol* 2007;40:284–8.
- 50  
51 26. Middeldorp JM. Epstein-Barr virus-specific humoral immune responses in health  
52 and disease. *Curr Top Microbiol Immunol* 2015;391:289–323.
- 53  
54 27. Mao YP, Li WF, Chen L, *et al.* A clinical verification of the Chinese 2008 staging  
55 system for nasopharyngeal carcinoma (in Chinese). *Ai Zheng* 2009;28:1022–8.
- 56  
57 28. Van Grunsven WM, Spaan WJ, Middeldorp JM. Localization and diagnostic  
58 application of immunodominant domains of the BFRF3-encoded Epstein-Barr virus  
59 capsid protein. *J Infect Dis* 1994;170:13–9.
- 60  
29. Fachiroh J, Paramita DK, Hariwiyanto B, *et al.* Single assay combination of

Epstein-Barr virus (EBV) EBNA1- and viral capsid antigen-p18-derived synthetic peptides for measuring anti-EBV Immunoglobulin G (IgG) and IgA antibody levels in sera from nasopharyngeal carcinoma patients: options for field screening. *J Clin Microbiol* 2006;44:1459–67.

30. Wei K, Xu Y, Liu J, *et al.* No incidence trends and no change in pathological proportions of nasopharyngeal carcinoma in Zhongshan in 1970–2007. *Asian Pacif J Cancer Prev* 2010;11:1595–9.

31. Pepe MS, Feng Z, Janes H, *et al.* Pivotal evaluation of the accuracy of a biomarker used for classification or prediction: standards for study design. *J Natl Cancer Inst* 2008;100:1432–8.

32. Stolzenberg MC, *et al.* Purified recombinant EBV desoxyribonuclease in serological diagnosis of nasopharyngeal carcinoma. *Int J Cancer*. 1996 May 3;66(3):337-41

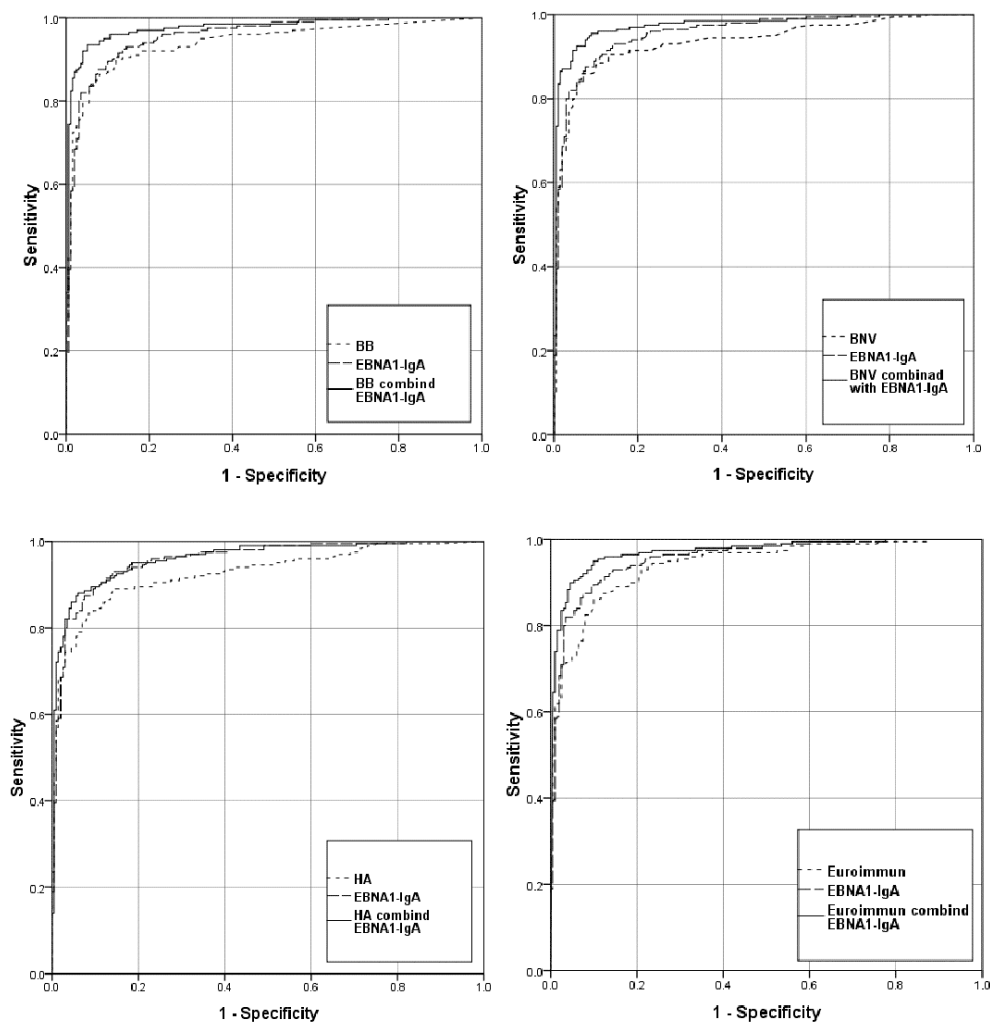

Figure1 ROCs for BB, BNV, HA, Euroimmun and their combination with EBNA1-IgA

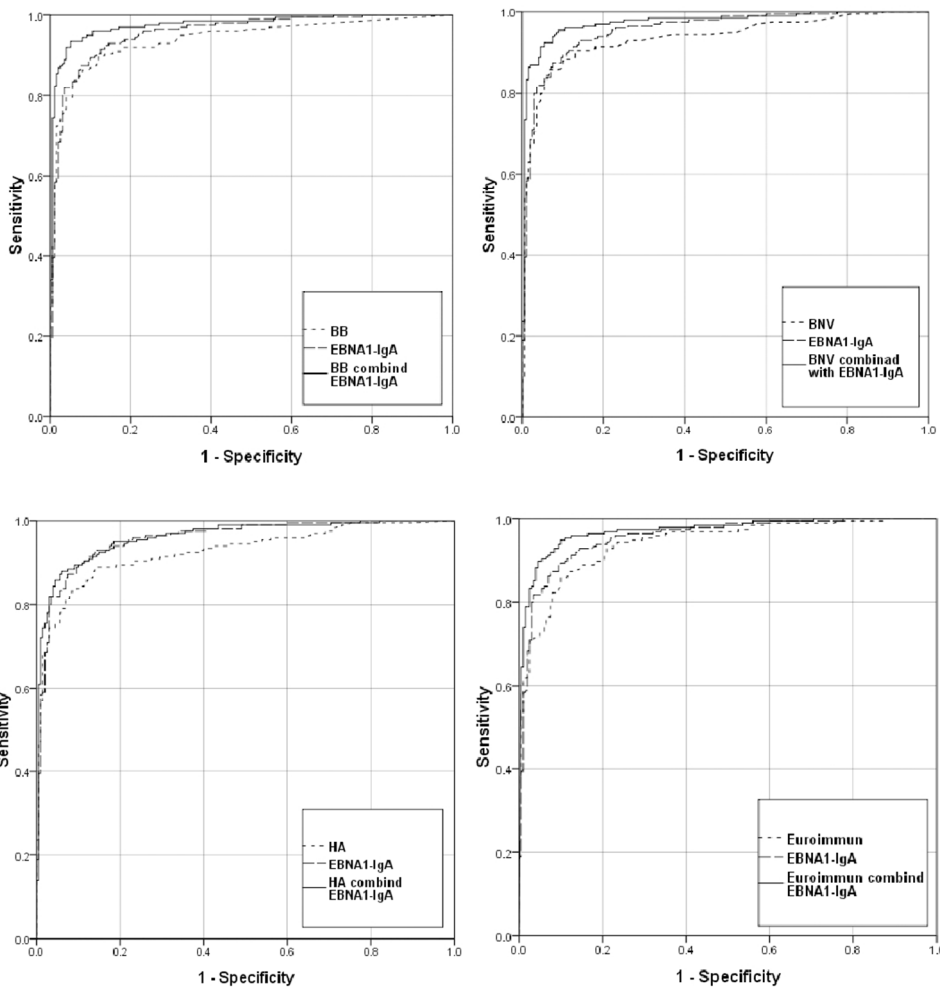

Figure1\_ROCs for BB, BNV, HA, Euroimmun and their combination with EBNA1-IgA

94x96mm (300 x 300 DPI)

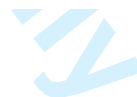

1  
2  
3  
4  
5  
6  
7  
8  
9  
10  
11  
12  
13  
14  
15  
16  
17  
18  
19  
20  
21  
22  
23  
24  
25  
26  
27  
28  
29  
30  
31  
32  
33  
34  
35  
36  
37  
38  
39  
40  
41  
42  
43  
44  
45  
46  
47  
48  
49  
50  
51  
52  
53  
54  
55  
56  
57  
58  
59  
60

| Section & Topic          | No  | Item                                                                                                                                                   | Reported on page # |
|--------------------------|-----|--------------------------------------------------------------------------------------------------------------------------------------------------------|--------------------|
| <b>TITLE OR ABSTRACT</b> |     |                                                                                                                                                        |                    |
|                          | 1   | Identification as a study of diagnostic accuracy using at least one measure of accuracy (such as sensitivity, specificity, predictive values, or AUC)  | 1,2                |
| <b>ABSTRACT</b>          |     |                                                                                                                                                        |                    |
|                          | 2   | Structured summary of study design, methods, results, and conclusions (for specific guidance, see STARD for Abstracts)                                 | 2                  |
| <b>INTRODUCTION</b>      |     |                                                                                                                                                        |                    |
|                          | 3   | Scientific and clinical background, including the intended use and clinical role of the index test                                                     | 2,3                |
|                          | 4   | Study objectives and hypotheses                                                                                                                        | 3                  |
| <b>METHODS</b>           |     |                                                                                                                                                        |                    |
| <i>Study design</i>      | 5   | Whether data collection was planned before the index test and reference standard were performed (prospective study) or after (retrospective study)     | 4                  |
| <i>Participants</i>      | 6   | Eligibility criteria                                                                                                                                   | 4                  |
|                          | 7   | On what basis potentially eligible participants were identified (such as symptoms, results from previous tests, inclusion in registry)                 | 4                  |
|                          | 8   | Where and when potentially eligible participants were identified (setting, location and dates)                                                         | 4                  |
|                          | 9   | Whether participants formed a consecutive, random or convenience series                                                                                | 4                  |
| <i>Test methods</i>      | 10a | Index test, in sufficient detail to allow replication                                                                                                  | 4,5                |
|                          | 10b | Reference standard, in sufficient detail to allow replication                                                                                          | 4,5                |
|                          | 11  | Rationale for choosing the reference standard (if alternatives exist)                                                                                  | 4                  |
|                          | 12a | Definition of and rationale for test positivity cut-offs or result categories of the index test, distinguishing pre-specified from exploratory         | 5                  |
|                          | 12b | Definition of and rationale for test positivity cut-offs or result categories of the reference standard, distinguishing pre-specified from exploratory | 5                  |
|                          | 13a | Whether clinical information and reference standard results were available to the performers/readers of the index test                                 | 4,5                |
|                          | 13b | Whether clinical information and index test results were available to the assessors of the reference standard                                          | 4,5                |
| <i>Analysis</i>          | 14  | Methods for estimating or comparing measures of diagnostic accuracy                                                                                    | 5                  |
|                          | 15  | How indeterminate index test or reference standard results were handled                                                                                | 5                  |
|                          | 16  | How missing data on the index test and reference standard were handled                                                                                 | 5                  |
|                          | 17  | Any analyses of variability in diagnostic accuracy, distinguishing pre-specified from exploratory                                                      | 5                  |
|                          | 18  | Intended sample size and how it was determined                                                                                                         | 4,5                |
| <b>RESULTS</b>           |     |                                                                                                                                                        |                    |
| <i>Participants</i>      | 19  | Flow of participants, using a diagram                                                                                                                  | 5,6                |
|                          | 20  | Baseline demographic and clinical characteristics of participants                                                                                      | 5,6                |
|                          | 21a | Distribution of severity of disease in those with the target condition                                                                                 | 5,6                |
|                          | 21b | Distribution of alternative diagnoses in those without the target condition                                                                            | 5,6                |
|                          | 22  | Time interval and any clinical interventions between index test and reference standard                                                                 | 5,6                |
| <i>Test results</i>      | 23  | Cross tabulation of the index test results (or their distribution) by the results of the reference standard                                            | 6-9                |
|                          | 24  | Estimates of diagnostic accuracy and their precision (such as 95% confidence intervals)                                                                | 6-9                |
|                          | 25  | Any adverse events from performing the index test or the reference standard                                                                            | 6-9                |
| <b>DISCUSSION</b>        |     |                                                                                                                                                        |                    |
|                          | 26  | Study limitations, including sources of potential bias, statistical uncertainty, and generalisability                                                  | 11                 |
|                          | 27  | Implications for practice, including the intended use and clinical role of the index test                                                              | 9-11               |
| <b>OTHER INFORMATION</b> |     |                                                                                                                                                        |                    |
|                          | 28  | Registration number and name of registry                                                                                                               | 11                 |
|                          | 29  | Where the full study protocol can be accessed                                                                                                          | 11                 |
|                          | 30  | Sources of funding and other support; role of funders                                                                                                  | 11                 |

# STARD 2015

---

## AIM

STARD stands for “Standards for Reporting Diagnostic accuracy studies”. This list of items was developed to contribute to the completeness and transparency of reporting of diagnostic accuracy studies. Authors can use the list to write informative study reports. Editors and peer-reviewers can use it to evaluate whether the information has been included in manuscripts submitted for publication.

---

## EXPLANATION

A **diagnostic accuracy study** evaluates the ability of one or more medical tests to correctly classify study participants as having a **target condition**. This can be a disease, a disease stage, response or benefit from therapy, or an event or condition in the future. A medical test can be an imaging procedure, a laboratory test, elements from history and physical examination, a combination of these, or any other method for collecting information about the current health status of a patient.

The test whose accuracy is evaluated is called **index test**. A study can evaluate the accuracy of one or more index tests. Evaluating the ability of a medical test to correctly classify patients is typically done by comparing the distribution of the index test results with those of the **reference standard**. The reference standard is the best available method for establishing the presence or absence of the target condition. An accuracy study can rely on one or more reference standards.

If test results are categorized as either positive or negative, the cross tabulation of the index test results against those of the reference standard can be used to estimate the **sensitivity** of the index test (the proportion of participants *with* the target condition who have a positive index test), and its **specificity** (the proportion *without* the target condition who have a negative index test). From this cross tabulation (sometimes referred to as the contingency or “2x2” table), several other accuracy statistics can be estimated, such as the positive and negative **predictive values** of the test. Confidence intervals around estimates of accuracy can then be calculated to quantify the statistical **precision** of the measurements.

If the index test results can take more than two values, categorization of test results as positive or negative requires a **test positivity cut-off**. When multiple such cut-offs can be defined, authors can report a receiver operating characteristic (ROC) curve which graphically represents the combination of sensitivity and specificity for each possible test positivity cut-off. The **area under the ROC curve** informs in a single numerical value about the overall diagnostic accuracy of the index test.

The **intended use** of a medical test can be diagnosis, screening, staging, monitoring, surveillance, prediction or prognosis. The **clinical role** of a test explains its position relative to existing tests in the clinical pathway. A replacement test, for example, replaces an existing test. A triage test is used before an existing test; an add-on test is used after an existing test.

Besides diagnostic accuracy, several other outcomes and statistics may be relevant in the evaluation of medical tests. Medical tests can also be used to classify patients for purposes other than diagnosis, such as staging or prognosis. The STARD list was not explicitly developed for these other outcomes, statistics, and study types, although most STARD items would still apply.

---

## DEVELOPMENT

This STARD list was released in 2015. The 30 items were identified by an international expert group of methodologists, researchers, and editors. The guiding principle in the development of STARD was to select items that, when reported, would help readers to judge the potential for bias in the study, to appraise the applicability of the study findings and the validity of conclusions and recommendations. The list represents an update of the first version, which was published in 2003.

More information can be found on <http://www.equator-network.org/reporting-guidelines/stard>.



1  
2  
3  
4  
5  
6  
7  
8  
9  
10  
11  
12  
13  
14  
15  
16  
17  
18  
19  
20  
21  
22  
23  
24  
25  
26  
27  
28  
29  
30  
31  
32  
33  
34  
35  
36  
37  
38  
39  
40  
41  
42  
43  
44  
45  
46  
47  
48  
49

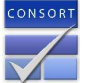

# CONSORT 2010 checklist of information to include when reporting a randomised trial\*

| Section/Topic                    | Item No | Checklist item                                                                                                                                                                              | Reported on page No |
|----------------------------------|---------|---------------------------------------------------------------------------------------------------------------------------------------------------------------------------------------------|---------------------|
| <b>Title and abstract</b>        |         |                                                                                                                                                                                             |                     |
|                                  | 1a      | Identification as a randomised trial in the title                                                                                                                                           | 1,2                 |
|                                  | 1b      | Structured summary of trial design, methods, results, and conclusions (for specific guidance see CONSORT for abstracts)                                                                     | 1,2                 |
| <b>Introduction</b>              |         |                                                                                                                                                                                             |                     |
| Background and objectives        | 2a      | Scientific background and explanation of rationale                                                                                                                                          | 2,3                 |
|                                  | 2b      | Specific objectives or hypotheses                                                                                                                                                           | 3                   |
| <b>Methods</b>                   |         |                                                                                                                                                                                             |                     |
| Trial design                     | 3a      | Description of trial design (such as parallel, factorial) including allocation ratio                                                                                                        | 3,4                 |
|                                  | 3b      | Important changes to methods after trial commencement (such as eligibility criteria), with reasons                                                                                          | 3,4                 |
| Participants                     | 4a      | Eligibility criteria for participants                                                                                                                                                       | 3,4                 |
|                                  | 4b      | Settings and locations where the data were collected                                                                                                                                        | 3,4                 |
| Interventions                    | 5       | The interventions for each group with sufficient details to allow replication, including how and when they were actually administered                                                       | 3,4                 |
| Outcomes                         | 6a      | Completely defined pre-specified primary and secondary outcome measures, including how and when they were assessed                                                                          | 3,4                 |
|                                  | 6b      | Any changes to trial outcomes after the trial commenced, with reasons                                                                                                                       | 3,4                 |
| Sample size                      | 7a      | How sample size was determined                                                                                                                                                              | 3,4                 |
|                                  | 7b      | When applicable, explanation of any interim analyses and stopping guidelines                                                                                                                | 3,4                 |
| <b>Randomisation:</b>            |         |                                                                                                                                                                                             |                     |
| Sequence generation              | 8a      | Method used to generate the random allocation sequence                                                                                                                                      | 4                   |
|                                  | 8b      | Type of randomisation; details of any restriction (such as blocking and block size)                                                                                                         | 4                   |
| Allocation concealment mechanism | 9       | Mechanism used to implement the random allocation sequence (such as sequentially numbered containers), describing any steps taken to conceal the sequence until interventions were assigned | 4                   |
| Implementation                   | 10      | Who generated the random allocation sequence, who enrolled participants, and who assigned participants to interventions                                                                     | 4                   |
| Blinding                         | 11a     | If done, who was blinded after assignment to interventions (for example, participants, care providers, those                                                                                | 4                   |



|    |                          |                                                                                                                     |      |
|----|--------------------------|---------------------------------------------------------------------------------------------------------------------|------|
| 1  |                          |                                                                                                                     |      |
| 2  |                          | assessing outcomes) and how                                                                                         |      |
| 3  |                          |                                                                                                                     |      |
| 4  |                          | 11b If relevant, description of the similarity of interventions                                                     | 5    |
| 5  | Statistical methods      | 12a Statistical methods used to compare groups for primary and secondary outcomes                                   | 5    |
| 6  |                          | 12b Methods for additional analyses, such as subgroup analyses and adjusted analyses                                | 5    |
| 7  |                          |                                                                                                                     |      |
| 8  | <b>Results</b>           |                                                                                                                     |      |
| 9  | Participant flow (a      | 13a For each group, the numbers of participants who were randomly assigned, received intended treatment, and        | 5-9  |
| 10 | diagram is strongly      | were analysed for the primary outcome                                                                               |      |
| 11 | recommended)             | 13b For each group, losses and exclusions after randomisation, together with reasons                                | 5-9  |
| 12 | Recruitment              | 14a Dates defining the periods of recruitment and follow-up                                                         | 8-9  |
| 13 |                          | 14b Why the trial ended or was stopped                                                                              | 8-9  |
| 14 |                          |                                                                                                                     |      |
| 15 | Baseline data            | 15 A table showing baseline demographic and clinical characteristics for each group                                 | 5,6  |
| 16 | Numbers analysed         | 16 For each group, number of participants (denominator) included in each analysis and whether the analysis was      | 5,6  |
| 17 |                          | by original assigned groups                                                                                         |      |
| 18 |                          |                                                                                                                     |      |
| 19 | Outcomes and             | 17a For each primary and secondary outcome, results for each group, and the estimated effect size and its           | 6-9  |
| 20 | estimation               | precision (such as 95% confidence interval)                                                                         |      |
| 21 |                          | 17b For binary outcomes, presentation of both absolute and relative effect sizes is recommended                     | 6-9  |
| 22 | Ancillary analyses       | 18 Results of any other analyses performed, including subgroup analyses and adjusted analyses, distinguishing       | 8-9  |
| 23 |                          | pre-specified from exploratory                                                                                      |      |
| 24 |                          |                                                                                                                     |      |
| 25 | Harms                    | 19 All important harms or unintended effects in each group (for specific guidance see CONSORT for harms)            | 8    |
| 26 |                          |                                                                                                                     |      |
| 27 | <b>Discussion</b>        |                                                                                                                     |      |
| 28 | Limitations              | 20 Trial limitations, addressing sources of potential bias, imprecision, and, if relevant, multiplicity of analyses | 11   |
| 29 | Generalisability         | 21 Generalisability (external validity, applicability) of the trial findings                                        | 9-11 |
| 30 | Interpretation           | 22 Interpretation consistent with results, balancing benefits and harms, and considering other relevant evidence    | 9-11 |
| 31 |                          |                                                                                                                     |      |
| 32 | <b>Other information</b> |                                                                                                                     |      |
| 33 | Registration             | 23 Registration number and name of trial registry                                                                   | 11   |
| 34 | Protocol                 | 24 Where the full trial protocol can be accessed, if available                                                      | 5,11 |
| 35 | Funding                  | 25 Sources of funding and other support (such as supply of drugs), role of funders                                  | 11   |
| 36 |                          |                                                                                                                     |      |

37

38 \*We strongly recommend reading this statement in conjunction with the CONSORT 2010 Explanation and Elaboration for important clarifications on all the items. If relevant, we also

39 recommend reading CONSORT extensions for cluster randomised trials, non-inferiority and equivalence trials, non-pharmacological treatments, herbal interventions, and pragmatic trials.

40 Additional extensions are forthcoming: for those and for up to date references relevant to this checklist, see [www.consort-statement.org](http://www.consort-statement.org).

41

42

# BMJ Open

## Evaluation of seven recombinant VCA-IgA ELISA kits for the diagnosis of nasopharyngeal carcinoma in China: a case-control trial

|                                 |                                                                                                                                                                                                                                                                                                                                                                                                                                                                                                                                                                                                                                                                                                                                                                                                                                                                                                                                                                                                                                                                                                                                                                                                                                                                                                                                                                                                                                                                                                                                                                                                                                                                                                                                                                                                                                                                                                                  |
|---------------------------------|------------------------------------------------------------------------------------------------------------------------------------------------------------------------------------------------------------------------------------------------------------------------------------------------------------------------------------------------------------------------------------------------------------------------------------------------------------------------------------------------------------------------------------------------------------------------------------------------------------------------------------------------------------------------------------------------------------------------------------------------------------------------------------------------------------------------------------------------------------------------------------------------------------------------------------------------------------------------------------------------------------------------------------------------------------------------------------------------------------------------------------------------------------------------------------------------------------------------------------------------------------------------------------------------------------------------------------------------------------------------------------------------------------------------------------------------------------------------------------------------------------------------------------------------------------------------------------------------------------------------------------------------------------------------------------------------------------------------------------------------------------------------------------------------------------------------------------------------------------------------------------------------------------------|
| Journal:                        | <i>BMJ Open</i>                                                                                                                                                                                                                                                                                                                                                                                                                                                                                                                                                                                                                                                                                                                                                                                                                                                                                                                                                                                                                                                                                                                                                                                                                                                                                                                                                                                                                                                                                                                                                                                                                                                                                                                                                                                                                                                                                                  |
| Manuscript ID                   | bmjopen-2016-013211.R2                                                                                                                                                                                                                                                                                                                                                                                                                                                                                                                                                                                                                                                                                                                                                                                                                                                                                                                                                                                                                                                                                                                                                                                                                                                                                                                                                                                                                                                                                                                                                                                                                                                                                                                                                                                                                                                                                           |
| Article Type:                   | Research                                                                                                                                                                                                                                                                                                                                                                                                                                                                                                                                                                                                                                                                                                                                                                                                                                                                                                                                                                                                                                                                                                                                                                                                                                                                                                                                                                                                                                                                                                                                                                                                                                                                                                                                                                                                                                                                                                         |
| Date Submitted by the Author:   | 29-Mar-2017                                                                                                                                                                                                                                                                                                                                                                                                                                                                                                                                                                                                                                                                                                                                                                                                                                                                                                                                                                                                                                                                                                                                                                                                                                                                                                                                                                                                                                                                                                                                                                                                                                                                                                                                                                                                                                                                                                      |
| Complete List of Authors:       | Gao, Rui; Sun Yat-sen University Cancer Center, State Key Laboratory of Oncology in Southern China, Department of Cancer Prevention; Sun Yat-Sen University, School of Public Health<br>Wang, Lin; Sun Yat-sen University Cancer Center, State Key Laboratory of Oncology in Southern China, Department of Nasopharyngeal Carcinoma<br>Zhang, Lifang; Guangzhou Women and Children's Medical Center, Division of Birth Cohort Study<br>Ye, Yanfang; Sun Yat-Sen University, Sun Yat-sen Memorial Hospital<br>Xie, Shanghang; Sun Yat-sen University Cancer Center, State Key Laboratory of Oncology in Southern China, Department of Cancer Prevention<br>Du, Jinlin; Sun Yat-sen University Cancer Center, State Key Laboratory of Oncology in Southern China, Department of Cancer Prevention; Sun Yat-Sen University, School of Public Health<br>Chen, Suihong; Sun Yat-sen University Cancer Center, State Key Laboratory of Oncology in Southern China, Department of Cancer Prevention; Sun Yat-Sen University, School of Public Health<br>Guo, Jie; Sun Yat-sen University Cancer Center, State Key Laboratory of Oncology in Southern China, Department of Cancer Prevention; Sun Yat-Sen University, School of Public Health<br>Yang, Mengjie ; Sun Yat-sen University Cancer Center, State Key Laboratory of Oncology in Southern China, Department of Cancer Prevention; Sun Yat-Sen University, School of Public Health<br>Lin, Chuyang; Sun Yat-sen University Cancer Center, State Key Laboratory of Oncology in Southern China, Department of Cancer Prevention; Sun Yat-Sen University, School of Public Health<br>Liu, Qing; Sun Yat-sen University Cancer Center, State Key Laboratory of Oncology in Southern China, Department of Cancer Prevention<br>Cao, Sumei; Sun Yat-sen University Cancer Center, State Key Laboratory of Oncology in Southern China, Department of Cancer Prevention |
| <b>Primary Subject Heading</b>: | Oncology                                                                                                                                                                                                                                                                                                                                                                                                                                                                                                                                                                                                                                                                                                                                                                                                                                                                                                                                                                                                                                                                                                                                                                                                                                                                                                                                                                                                                                                                                                                                                                                                                                                                                                                                                                                                                                                                                                         |
| Secondary Subject Heading:      | Diagnostics, Epidemiology, Research methods                                                                                                                                                                                                                                                                                                                                                                                                                                                                                                                                                                                                                                                                                                                                                                                                                                                                                                                                                                                                                                                                                                                                                                                                                                                                                                                                                                                                                                                                                                                                                                                                                                                                                                                                                                                                                                                                      |
| Keywords:                       | Nasopharyngeal carcinoma, Epstein-Barr virus, VCA-IgA, Diagnostic effect, Screening                                                                                                                                                                                                                                                                                                                                                                                                                                                                                                                                                                                                                                                                                                                                                                                                                                                                                                                                                                                                                                                                                                                                                                                                                                                                                                                                                                                                                                                                                                                                                                                                                                                                                                                                                                                                                              |
|                                 |                                                                                                                                                                                                                                                                                                                                                                                                                                                                                                                                                                                                                                                                                                                                                                                                                                                                                                                                                                                                                                                                                                                                                                                                                                                                                                                                                                                                                                                                                                                                                                                                                                                                                                                                                                                                                                                                                                                  |

1  
2  
3  
4  
5  
6  
7  
8  
9  
10  
11  
12  
13  
14  
15  
16  
17  
18  
19  
20  
21  
22  
23  
24  
25  
26  
27  
28  
29  
30  
31  
32  
33  
34  
35  
36  
37  
38  
39  
40  
41  
42  
43  
44  
45  
46  
47  
48  
49  
50  
51  
52  
53  
54  
55  
56  
57  
58  
59  
60

SCHOLARONE™  
Manuscripts

For peer review only

1  
2  
3 **Evaluation of seven recombinant VCA-IgA ELISA kits for the diagnosis of**  
4 **nasopharyngeal carcinoma in China: a case-control trial**  
5  
6

7 Rui Gao<sup>1,2\*</sup>, Lin Wang<sup>3\*</sup>, Li-Fang Zhang<sup>4</sup>, Yan-Fang Ye<sup>5</sup>, Shang-Hang Xie<sup>1</sup>, Jin-Lin  
8 Du<sup>1,2</sup>, Sui-Hong Chen<sup>1,2</sup>, Jie Guo<sup>1,2</sup>, Meng-Jie Yang<sup>1,2</sup>, Chu-yang Lin<sup>1,2</sup>, Qing liu<sup>1#</sup>,  
9 Su-Mei Cao<sup>1#</sup>  
10

11 <sup>1</sup>Department of Cancer Prevention, Sun Yat-sen University Cancer Center, State Key  
12 Laboratory of Oncology in Southern China, Guangzhou, 510060, P.R. China;

13 <sup>2</sup>School of Public Health, Sun Yat-Sen University, Guangzhou, 510060, P.R. China;

14 <sup>3</sup>Department of Nasopharyngeal Carcinoma, Sun Yat-sen University Cancer Center,  
15 State Key Laboratory of Oncology in Southern China, Guangzhou, 510060, P.R.  
16 China;

17 <sup>4</sup>Division of Birth Cohort Study, Guangzhou Women and Children's Medical Center,  
18 Guangzhou, 510623, P.R. China;

19 <sup>5</sup>Sun Yat-sen Memorial Hospital, Sun Yat-sen University, Guangzhou, 510120, P.R.  
20 China.

21 \*These authors contributed equally to this work.  
22  
23

24  
25  
26  
27 **#Correspondence to**

28 Prof. Su-Mei Cao, caosm@sysucc.org.cn;

29 Prof. Qing Liu, liuqing@sysucc.org.cn  
30  
31

32 Authors' E-mail:

33 Rui Gao: gaor5@mail2.sysu.edu.cn

Lin Wang: wangl1@sysucc.org.cn

34 Li-Fang Zhang: lifanglydia@hotmail.com

Yan-Fang Ye: yeyanfang1@gmail.com

35 Shang-Hang Xie: xieshh@sysucc.org.cn

Jin-Lin Du: dujl3@mail2.sysu.edu.cn

36 Sui-Hong Chen: chensh43@mail2.sysu.edu.cn

Jie Guo: guojiegina@126.com

37 Meng-Jie Yang: yangmj@sysucc.org.cn

Chu-yang Lin: linchy23@mail2.sysu.edu.cn  
38  
39  
40

41 Preferred reviewers:

42 1. Fang Fang, Fang.Fang@ki.se, Department of Medical Epidemiology and  
43 Biostatistics, Karolinska Institutet, Stockholm, Sweden.

44 2. Liming Liang, lliang@hsph.harvard.edu, Departments of Epidemiology and  
45 Biostatistics, Harvard School of Public Health, Boston, MA, US.

46 3. Qing Chen, qingchen@fimmu.com, Department of Epidemiology, School of  
47 Public Health and Tropical Medicine, Southern Medical University, Guangzhou,  
48 China  
49  
50  
51

52 **Key words:** Nasopharyngeal carcinoma, Epstein-Barr virus, VCA-IgA, Diagnostic  
53 effect, Screening  
54

55  
56 Word count(Excluding References): 4168  
57  
58  
59  
60

## ABSTRACT

**Objective:** Seven recombinant VCA-IgA ELISA kits are widely used in China, but their diagnostic effects have not been evaluated. In this study, we evaluated whether the diagnostic effects of these kits are similar to those of the standard kit (EUROIMMUN, Lübeck, Germany).

**Methods:** A diagnostic case-control trial was conducted, with 200 cases of nasopharyngeal carcinoma (NPC) and 200 controls from NPC-endemic areas in southern China. The areas under the curve (AUCs), the sensitivities and the specificities of testing kits were compared with those of the standard kit. The test-retest reliability of each kit was determined by intraclass correlation coefficient (ICC). Their diagnostic accuracy in combination with EBNA1-IgA was also evaluated in logistic models.

**Results:** Three testing kits – KSB, BB and HA – showed diagnostic accuracy equal to that of the standard kit, with good performance in the AUCs (0.926~0.945), and no significant differences in sensitivity were found between early- and advanced-stage NPCs. ICCs exceeded 0.8. Three logistic regression models were built, and the AUCs of these models (0.961~0.977) were better than those of the individual VCA-IgA kits. All new models had diagnostic accuracy equal to that of the standard kit. New cutoff values of these three kits and their corresponding combinations for researchers to replicate and use in NPC early detection and screening in the future were provided.

**Conclusions:** Three recombinant VCA-IgA kits – KSB, BB and HA – had diagnostic effects equal to those of the standard kit, and, in combination with EBNA1-IgA in logistic regression models, can be used in future screening for NPC.

### Strengths and limitations of this study

- This is the first study to carry out a comprehensive evaluation of recombinant commercial diagnostic VCA-IgA (ELISA) kits in China, and logistic models combining VCA-IgA with EBNA1-IgA were established.
- New cutoff values for VCA-IgA kits and their corresponding combinations for researchers to replicate and use in NPC early detection and screening in the future were provided.
- All cases and controls were from NPC-endemic areas of southern China, and thus these results might not be applicable to other populations.
- Only 33 early stage NPC cases were collected. Controls were recruited from rural area, but half of the NPC cases were from urban areas.
- Cutoff values for NPC screening by means of these models described in this study must be verified in prospective mass screening.

## INTRODUCTION

Nasopharyngeal carcinoma (NPC) is a common form of squamous-cell carcinoma in southern China and southeastern Asia. The annual incidence rate of NPC in southern China can reach 25 per 100,000 person-years, which is about 25-fold higher than in the

1  
2  
3 rest of the world.<sup>1-4</sup> NPC is a complex disease caused by a combination of  
4 Epstein-Barr virus (EBV), chronic infection, the environment and host genes in a  
5 multi-step process of carcinogenesis, but until now there have been no effective  
6 preventive measures.<sup>5-9</sup> Long-term survival rates differ substantially between patients  
7 with advanced- (stages III and IV) and early- (stages I and II) stage NPC. Four-year  
8 survival rates of early-stage NPC patients are 96.7% compared with 67.1% for those  
9 with advanced-stage NPC.<sup>5</sup> Mass screening has become the most practical method for  
10 improved early detection in and overall prognosis of NPC patients in the endemic  
11 areas.<sup>10 11</sup>

12  
13  
14  
15  
16 Serum antibodies against EBV-related antigens, especially immunoglobulin A (IgA)  
17 against viral capsid antigen (VCA-IgA), early antigen (EA-IgA), EBV nuclear antigen  
18 1 (EBNA1-IgA) and so on, remain elevated for an average of 38 months in the  
19 preclinical phase,<sup>9-14</sup> and serological tests for these markers are simple and  
20 inexpensive.<sup>15-18</sup> Therefore, since the 1970s, these tests have been used as screening  
21 markers for NPC in endemic areas. In our previous study, we evaluated the diagnostic  
22 performance of seven commercial EBV-related antibodies by enzyme-linked  
23 immunosorbent assay (ELISA) and found EBNA1-IgA (Zhongshan Biotech, China)  
24 and VCA-IgA (EUROIMMUN, Lübeck, Germany) ELISA to be the top two  
25 seromarkers, with AUCs of 0.95 (95%CI, 0.93–0.97) and 0.94 (95%CI, 0.92–0.97),  
26 respectively<sup>16</sup>. We further verified that the combination of VCA-IgA and EBNA1-IgA  
27 outperformed any individual EBV seromarkers, with AUC up to 0.97 (95%CI, 0.96,  
28 0.99).<sup>15-17</sup> Thus, since 2011, the combination of VCA-IgA and EBNA1-IgA has been  
29 recommended as the standard tool for NPC screening in China.<sup>18</sup>

30  
31  
32  
33  
34  
35 Nowadays, several kinds of commercial VCA-IgA kits based on recombinant peptides  
36 have been developed in China and are presently widely used for the early detection of  
37 and screening for NPC. However, their diagnostic performance for NPC alone and in  
38 combination with EBNA1-IgA has not been evaluated. In this study, we evaluated  
39 whether the effects of the NPC-diagnostic kits are comparable with those of the  
40 standard VCA-IgA kit and can be substituted for it. If so, we will further explore the  
41 combination diagnostic strategy with EBNA1-IgA for the early detection of and mass  
42 screening for NPC.

## 43 44 45 46 **METHODS**

### 47 **Study population**

48  
49 Serum specimens were continuously collected from 200 patients hospitalised with  
50 NPC in the Sun Yat-sen University Cancer Center (SYSUCC) from January  
51 2013 to June 2013. These cases were histologically confirmed by biopsy, and the  
52 clinical stages were classified according to the 2009 Union for International Cancer  
53 Control (UICC) criteria, including 33 patients with early-stage NPC (stages I, II) and  
54 167 with advanced-stage NPC (stages III, IV). The inclusion criteria included being  
55 between 30 and 59 years of age and residing in one of the six high-endemic provinces  
56  
57  
58  
59  
60

of southern China (Guangdong, Guangxi, Jiangxi, Hunan, Fujian or Hainan Province). Other information, including demographic data, smoking, drinking histories and family history of NPC, was collected by the physician in charge. All serum samples were collected before treatment.

The 200 healthy controls were randomly selected from among healthy people who participated in physical examinations at the Sihui Cancer Center (Sihui City, Guangdong Province, China) from July 2013 to September 2013 and were frequency-matched with cases by age (5-year age groups) and gender. All participants completed a short questionnaire to record demographic data, smoking, drinking histories and family history of NPC and donated 3 mL of blood.

This study was approved by the Clinical Research Ethics Committee of the SYSUCC (YB2015-029-01), and all participants provided written informed consent.

### Detection of serological EBV antibodies

Serum and buffy coat were separated less than 4 hours after collection and stored at -80°C before being tested. None of the specimens was hemolytic or repeatedly frozen more than twice. Seven recombinant VCA-IgA kits, the standard VCA-IgA kit (EUROIMMUN) and the standard EBNA1-IgA kit (Zhongshan) were tested (table 1).

**Table 1** Product information for eight brands of VCA-IgA kits and the EBNA1-IgA kit

| Abbreviation for kits | Manufacturer                                     |
|-----------------------|--------------------------------------------------|
| VCA-IgA               |                                                  |
| KSB                   | Shenzhen Kang Sheng Bao Bio-Technology Co., Ltd. |
| BNV                   | Bioneovan Co., Ltd.                              |
| GBI                   | Beijing BGI-GBI Biotech Co., Ltd.                |
| BB                    | Beijing Beier Bioengineering Co., Ltd.           |
| HA                    | Shenzhen HuianBioscience Co., Ltd.               |
| HK                    | Shen Zhen HuaKang Co., Ltd.                      |
| ZS                    | ZhongShan Biotech Co., Ltd.                      |
| EUROIMMUN             | EUROIMMUN Medizinische Labordiagnostika AG       |
| EBNA1-IgA             | ZhongShan Biotech Co., Ltd.                      |

All samples were renumbered and tested blindly by one technician according to the manufacturers' instructions. Levels of antibodies were assessed by photometric measurement, which provided optical density (OD) values. Reference ODs (rOD) were obtained according to manufacturers' instructions by dividing OD values by a reference control. To investigate the test-retest reliability of each kit, 10% serum samples (40 samples) were randomly chosen and retested.

### Statistical analysis

Demographic characteristics and NPC risk factors between cases and controls were compared by chi-squared tests. The cutoff value of each single kit was defined with the largest Youden Indices (sensitivity+specificity-1) chosen from each receiver operating characteristic (ROC). The diagnostic efficacy of each kit was evaluated by AUC, and non-inferiority tests based on the bootstrap approach were performed to determine whether the AUCs of these recombinant testing kits were inferior to that of the standard kit (let  $\Delta=0.05$  be the pre-determined clinically meaningful equivalence limit).<sup>19-22</sup> The sensitivity and specificity of each kit were calculated, and their 95% confidence intervals (CIs) were estimated by the methods of Simel and colleagues (The 95%CIs of sensitivities for early stage groups was estimated by look-up table method for binomial distribution because the sample size was less than 50).<sup>23 24</sup> Differences in sensitivities between early- and advanced-stage NPC with each kit were compared by Chi-squared tests (Fisher's exact test and McNemar's test will be specified while others Chi-squared tests means Person's Chi-square test). Intraclass correlation coefficients (ICC) were performed to determine test-retest reliability.

In order to prevent bias and study the virus factor only, we matched the baseline covariates (gender and age) and some of the important NPC risk factors (smoking, drinking and NPC history). Binary unconditional logistic regressions were used to establish formulae for VCA-IgA and EBNA1-IgA. The diagnostic efficacy of each formula was evaluated by sensitivity, specificity and AUC, compared with the standard formula,  $Logit P = -3.934 + 2.203VCA-IgA (EUROIMMUN) + 4.797EBNA1-IgA$ . The cutoff p-value in the corresponding logistic regression for distinguishing between NPC cases and controls was defined with the largest Youden Index chosen from each ROC. Two minimally acceptable false-positive rates (1-Specificity), 3% and 7%, were used empirically to establish the cutoff p-values for classifying different NPC risk subgroups.<sup>16 17</sup>

The non-inferiority tests were one-sided, and  $p>0.05$  was considered to be non-inferior. Other tests were two-sided, and  $p<0.05$  was considered to be statistically significant. Data were analyzed by SAS9.2 and SPSS16.0 software.

## RESULTS

### Baseline information

Baseline information on gender, age, smoking, drinking and NPC family history was comparable between cases and controls, and no statistically significant differences were found between them. Further, there were no statistically significant differences for these items between early- and advanced-stage cases (table 2).

**Table 2** Demographic characteristics of NPC cases and controls

| Categories | NPC Cases (N <sub>1</sub> =200) No. (%) |                |                | Controls (N <sub>2</sub> =200) | p <sup>5</sup> |
|------------|-----------------------------------------|----------------|----------------|--------------------------------|----------------|
|            | Early stage                             | Advanced stage | Total          |                                |                |
|            |                                         |                | p <sup>4</sup> |                                |                |



|                                 | (n=33)    | (n=167)    | No. (%)    |            |       |
|---------------------------------|-----------|------------|------------|------------|-------|
| Gender                          |           |            |            |            | 0.472 |
| Male                            | 27 (81.8) | 127 (76.0) | 154 (77.0) | 147 (73.5) |       |
| Female                          | 6 (18.2)  | 40 (24.0)  | 46 (23.0)  | 53 (26.5)  |       |
| Age (years)                     |           |            |            |            | 0.299 |
| 30~                             | 6 (18.2)  | 47 (28.1)  | 53 (26.5)  | 47 (23.5)  |       |
| 40~                             | 13 (39.4) | 70 (41.9)  | 83 (41.5)  | 87 (43.5)  |       |
| 50~                             | 14 (42.4) | 50 (29.9)  | 64 (32.0)  | 66 (33.0)  |       |
| Smoking <sup>1</sup>            |           |            |            |            | 0.857 |
| Yes                             | 11 (33.3) | 53 (31.7)  | 64 (32.0)  | 61 (30.5)  |       |
| No                              | 22 (66.7) | 114 (68.3) | 136 (68.0) | 139 (69.5) |       |
| Drinking <sup>2</sup>           |           |            |            |            | 0.641 |
| Yes                             | 6 (18.2)  | 25 (15.0)  | 31 (15.5)  | 27 (13.5)  |       |
| No                              | 27 (81.8) | 142 (85.0) | 169 (84.5) | 173 (86.5) |       |
| NPC family history <sup>3</sup> |           |            |            |            | 0.732 |
| Yes                             | 3 (9.1)   | 13 (7.8)   | 16 (8.0)   | 10 (5.0)   |       |
| No                              | 30 (90.9) | 154 (92.2) | 184 (92.0) | 190 (95.0) |       |

<sup>1</sup>'Smoking' refers to people who smoked more than one cigarette every three days within half a year and included current and former smokers. <sup>2</sup>'Drinking' refers to people who consumed alcoholic beverages every week within half a year and included current and former drinkers. <sup>3</sup>'NPC family history' refers to people whose parents, children and siblings have or did have NPC. <sup>4</sup>Differences in early- and advanced-stage NPC were compared by chi-squared tests (Fisher's Exact Test for NPC family history). \*p<0.05 was considered as statistically significant. <sup>5</sup>Differences in NPC Cases and Controls were compared by chi-squared tests. \*p<0.05 was considered as statistically significant.

### The diagnostic accuracies of eight brands of VCA-IgA kits and the EBNA1-IgA kit

Table 3 shows that the AUCs of four kits – KSB, BB, BNV and HA – were as high as that of the standard VCA-IgA kit (AUC, 0.942; 95%CI, 0.920-0.964). The AUCs, in order, were 0.945 for KSB (95%CI 0.925-0.966), 0.940 for BB (95%CI 0.916-0.964), 0.936 for BNV (95%CI 0.911-0.961) and 0.926 for HA (95%CI 0.900-0.953). In addition, the AUCs of GBI, HK and ZS were lower than that of the standard kit. Furthermore, no significant differences were found between early- and advanced-stage NPC in the sensitivities of six kits (p>0.05), except for BNV (p=0.044).

**Table 3** The diagnostic accuracies of eight brands of VCA-IgA kits and the EBNA1-IgA kit in distinguishing between NPC cases and controls

| Kits | Cutoff values | Sensitivity (%) |                |       | Specificity (%) | AUC (95%CI) | P <sup>3</sup> |
|------|---------------|-----------------|----------------|-------|-----------------|-------------|----------------|
|      |               | Early stage     | Advanced stage | Total | Control         |             |                |

|           | <sup>1</sup> | (95%CI)               | (95%CI) <sup>2</sup> | (95%CI)             | (95% CI)            |                        |        |
|-----------|--------------|-----------------------|----------------------|---------------------|---------------------|------------------------|--------|
| VCA-IgA   |              |                       |                      |                     |                     |                        |        |
| BB        | 0.58         | 75.8<br>(58.0-89.0)   | 88.6<br>(84.2-93.0)  | 86.5<br>(81.8-91.2) | 92.0<br>(88.2-95.8) | 0.940<br>(0.916-0.964) | 0.002  |
| BNV       | 0.923        | 72.7<br>(54.0-87.0)   | 88.0<br>(83.5-92.5)* | 86.0<br>(81.2-90.8) | 93.5<br>(90.1-96.9) | 0.936<br>(0.911-0.961) | 0.003  |
| GBI       | 0.825        | 72.7<br>(54.0-87.0)   | 76.6<br>(70.8-82.5)  | 76.0<br>(70.1-81.9) | 92.0<br>(88.2-95.8) | 0.899<br>(0.868-0.930) | 0.341* |
| HA        | 0.884        | 93.9<br>(80.0-99.0)   | 88.0<br>(83.5-92.5)  | 89.0<br>(84.7-93.3) | 86.0<br>(81.2-90.8) | 0.926<br>(0.900-0.953) | 0.012  |
| HK        | 1.218        | 81.8<br>(64.0-93.0)   | 83.2<br>(78.1-88.4)  | 83.0<br>(77.8-88.2) | 89.5<br>(85.3-93.7) | 0.913<br>(0.884-0.942) | 0.075* |
| KSB       | 0.283        | 100.0<br>(89.0-100.0) | 86.8<br>(82.1-91.5)  | 89.0<br>(84.7-93.3) | 87.5<br>(82.9-92.1) | 0.945<br>(0.925-0.966) | 0.000  |
| ZS        | 0.418        | 75.8<br>(58.0-89.0)   | 74.3<br>(68.2-80.3)  | 74.5<br>(68.5-80.5) | 87.5<br>(82.9-92.1) | 0.868<br>(0.831-0.904) | 0.878* |
| EUROIMMUN | 1.561        | 87.9<br>(72.0-97.0)   | 85.6<br>(80.8-90.5)  | 86.0<br>(81.2-90.8) | 90.0<br>(85.8-94.2) | 0.942<br>(0.921-0.964) |        |
| EBNA1-IgA | 1.203        | 93.9<br>(80.0-99.0)   | 86.2<br>(81.5-91.0)  | 87.5<br>(82.9-92.1) | 92.5<br>(88.8-96.2) | 0.956<br>(0.937-0.975) | 0.000  |

<sup>1</sup>Cutoff value for NPC diagnosis was defined as the value with the largest Youden Index chosen from each ROC.

<sup>2</sup>Differences in the sensitivities of early- and advanced-stage NPC were compared by Person Chi-Squared tests.

\*p<0.05 was considered as statistically significant. <sup>3</sup>p values were estimated by non-inferiority tests based on the bootstrap approach for AUC between EUROIMMUN and other kits. \*p<0.05 was considered as statistically significant while p>0.05 was consider to be inferior to the standard kit.

### The test–retest reliabilities of eight brands of VCA-IgA kits and the EBNA1-IgA kit

Ten percent serum samples (40 samples) were randomly chosen and retested for calculation of the ICC of each brand of kit, VCA-IgA or EBNA1-IgA. The test-retest reliabilities of all kits were excellent (>0.75, excellent) according to Fleiss's classification<sup>25</sup> (table 4).

**Table 4** The test–retest reliabilities of eight brands of VCA-IgA kits and the EBNA1-IgA kit

| Kits    | ICC*  | 95%CI       |
|---------|-------|-------------|
| VCA-IgA |       |             |
| BB      | 0.990 | 0.980-0.994 |
| BNV     | 0.982 | 0.967-0.991 |
| GBI     | 0.964 | 0.933-0.981 |
| HA      | 0.975 | 0.952-0.987 |

|           |       |             |
|-----------|-------|-------------|
| HK        | 0.876 | 0.764-0.935 |
| KSB       | 0.823 | 0.666-0.906 |
| ZS        | 0.978 | 0.958-0.988 |
| EUROIMMUN | 0.913 | 0.830-0.955 |
| EBNA1-IgA | 0.981 | 0.964-0.990 |

\*Less than 0.40- poor; Between 0.40 and 0.59- Fair;  
Between 0.60 and 0.74- good; Between 0.75 and 1.00- Excellent

### The diagnostic accuracies of the combinations of VCA-IgA and EBNA1-IgA with logistic models

We chose for testing three VCA-IgA kits with high AUCs, no differences in diagnoses for early- and advanced-stage NPC and excellent test-retest reliabilities, and then combined each with the EBNA1-IgA kit by logistic models. Three logistic regression models were established:

$$\text{Logit}P = -3.2323 + 0.8060\text{VCA-IgA (BB)} + 1.1044 \text{ EBNA1-IgA}$$

$$\text{Logit}P = -2.7591 + 0.6380\text{VCA-IgA (HA)} + 1.0620\text{EBNA1-IgA}$$

$$\text{Logit}P = -2.6039 + 0.5312\text{VCA-IgA (KSB)} + 1.1673 \text{ EBNA1-IgA}$$

In all these models, both VCA-IgA and EBNA1-IgA were statistically significant independent predictors of NPC risk ( $p < 0.05$ ), and the AUC of each combination was statistically significantly larger than that of each single VCA-IgA ( $p < 0.05$ ). The AUC of KSB increased from 0.945 (95%CI 0.925-0.966) to 0.964 (95%CI 0.947-0.981); BB increased from 0.940 (95%CI 0.916-0.964) to 0.977 (95%CI 0.963-0.991); and HA increased from 0.926 (95%CI 0.900-0.953) to 0.961 (95%CI 0.943-0.979) (figure 1).

Table 5 shows the diagnostic accuracies of the three new combinations and the standard combination [ $\text{Logit } P = -3.934 + 2.203\text{VCA-IgA (EUROIMMUN)} + 4.797\text{EBNA1-IgA}$ ] in distinguishing between NPC cases and controls. The AUCs of these three combinations were as high as that of the standard combination (AUC 0.970; 95%CI 0.956-0.985) ( $p < 0.05$ ). Furthermore, no statistically significant difference was found in the sensitivity of each combination between early- and advanced-stage NPC ( $p > 0.05$ ).

We used two minimally acceptable false-positive rates (1-Specificity) of 3% and 7% to define the high-risk and medium-risk cutoff values for the new combinations. The corresponding logistic regression p-values were 0.707 and 0.232 for BB, 0.766 and 0.364 for HA, 0.831 and 0.384 for KSB, and the corresponding true-positive rates (Sensitivities) were 88.0% and 93.5% for BB, 78.0% and 88.0% for HA and 79.0% and 87.5% for KSB.

**Table 5** The diagnostic accuracies of three new combinations and the standard combination in distinguishing between NPC cases and controls

| Combination          | New cutoff values <sup>1</sup> | Sensitivity (%)     |                                     |                            | Specificity (%)               | AUC (95%CI)            | P <sup>3</sup> |
|----------------------|--------------------------------|---------------------|-------------------------------------|----------------------------|-------------------------------|------------------------|----------------|
|                      |                                | Early stage (95%CI) | Advanced stage (95%CI) <sup>2</sup> | Total (95%CI) <sup>3</sup> | Control (95% CI) <sup>4</sup> |                        |                |
| BB+EBNA1-IgA         | 0.258                          | 97.0<br>(85.0-100)  | 92.8<br>(89.2-96.4)                 | 93.5<br>(90.1-96.9)        | 95.0<br>(92.0-98.0)           | 0.977<br>(0.963-0.991) | <0.001         |
| HA+EBNA1-IgA         | 0.379                          | 97.0<br>(85.0-100)  | 86.2<br>(81.5-91.0)                 | 88.0<br>(83.5-92.5)        | 94.0<br>(90.7-97.3)           | 0.961<br>(0.943-0.979) | <0.001         |
| KSB+EBNA1-IgA        | 0.191                          | 93.9<br>(80-100)    | 94.6<br>(91.5-97.7)                 | 94.5<br>(91.3-97.7)        | 87.0<br>(82.3-91.7)*          | 0.964<br>(0.947-0.981) | <0.001         |
| Standard combination | 0.998                          | 97.0<br>(85-100)    | 88.6<br>(84.2-93.0)                 | 90.0<br>(85.8-94.2)        | 95.5<br>(92.6-98.4)           | 0.970<br>(0.956-0.985) |                |

<sup>1</sup>New cutoff value for NPC diagnosis was defined as the value with the largest Youden Index chosen from each ROC. <sup>2</sup>Differences in the sensitivity of early- and advanced-stage NPC were compared by Person Chi-Squared tests. \*p<0.05 was considered as statistically significant. <sup>3</sup>p-values were estimated by non-inferiority tests based on the bootstrap approach for AUC between new combinations and the standard combination. \*p<0.05 was considered as statistically significant while p>0.05 was considered to be inferior to the standard kit.

## DISCUSSION

In our study, seven recombinant VCA-IgA kits were evaluated, and of these, KSB, BB and HA had diagnostic effects as good as those of the standard kit in terms of sensitivity, specificity and AUC. Combining VCA-IgA with EBNA1-IgA by logistic regression models increased the diagnostic accuracy of these three kits, and all combinations performed as well as the standard combination in sensitivity, specificity and AUC. This is the first study to carry out a comprehensive evaluation of recombinant commercial diagnostic VCA-IgA (ELISA) kits in China, and logistic models combining VCA-IgA with EBNA1-IgA were established. Furthermore, new cutoff values for these VCA-IgA kits and their corresponding combinations for researchers to replicate and use in NPC early detection and screening in the future were provided.

In this study, we first calculated the diagnostic performance of each brand of VCA/IgA kit. The AUC of the standard VCA-IgA kit (EUROIMMUN) was 0.942 (95%CI 0.920-0.964), which was consistent with results from our previous studies and verified that the diagnostic performance of VCA-IgA was good and stable.<sup>16 17</sup> We also found that the sensitivities, specificities and AUCs of three kits – KSB, BB and HA – were as high as those of the standard kit, and no significant differences in sensitivity were found between early- and advanced-stage NPC. Moreover, all test–retest reproducibilities were excellent (>0.75) and the CVs of Differences Values of test and retest result of all assays were shown in Supplementary Table2. These results suggested that these three kits had equal diagnostic effects and can be substituted for the standard kit. The costs of these recombinant commercial diagnostic

1  
2  
3 kits were only half that of the standard kit, making them more cost-effective.  
4

5  
6 The EBV capsid antigen (VCA) is a late protein produced in the EBV lytic infection  
7 period. VCA contains a batch of capsid proteins, such as VCA-p18 (BFRF3),  
8 VCA-p23 (BLRF2), gp125/110 (BALF4) and so on, which have unique immune  
9 dominants and virus-specific antigenic domains. These domains contain several small  
10 peptide regions (epitopes) which can be combined to form a powerful diagnostic  
11 reagent for VCA-IgA.<sup>26-27</sup> The capsid proteins in the EUROIMMUN kit<sup>28</sup> were  
12 extracted from the pyrolysis products of human B lymphocytes (P3HR1 cell line)  
13 infected by EBV and contained a combined native capsid protein of EBV. We noticed  
14 that, in contrast to the standard kit with a combined native capsid protein, these testing  
15 kits contain primarily recombinant p18 capsid proteins (VCA-p18). VCA-p18 is a  
16 small capsid protein that contains several small peptide regions (epitopes) which can  
17 be combined to form a powerful diagnostic reagent for VCA-IgA antibody  
18 responses.<sup>27</sup> Some researchers have reported that VCA-p18 is the major VCA antigen  
19 for IgA responses.<sup>27 29</sup> Our study showed that the AUCs of these VCA-p18  
20 recombinant kits were more than 0.85, and three of them had the same diagnostic  
21 effects as the standard kit, suggesting that, although the manufacturing processes of  
22 some recombinant VCA-p18 kits still need to be improved, some of the recombinant  
23 kits can be substituted for the standard kit for NPC diagnosis.  
24  
25  
26  
27  
28

29  
30 As the serum antibody level (rOD) provides continuous data, the cutoff value for  
31 distinguishing between NPC cases and controls is critical for the early detection of  
32 and screening for NPC. A reasonable cutoff value can balance sensitivity and  
33 specificity. In the early detection of and screening for NPC, high sensitivity is  
34 required for the identification of high-risk individuals, and high specificity is required  
35 for reducing the rate of misdiagnosis and associated costs. According to the cutoff  
36 values provided by the kits' instructions, the sensitivities of testing kits were always  
37 too low, whilst their specificities were always too high. For example, the sensitivity  
38 and the specificity of KSB are 0.780 and 0.925, respectively, suggesting that the old  
39 cutoff values should be adjusted (Supplementary Table1). We established new cutoff  
40 values for distinguishing between NPC cases and controls by Youdon Indices, and  
41 then obtained reasonable sensitivities and specificities. After adjustment, the new  
42 cutoff value for KSB is 0.283, and the sensitivity and specificity are 0.890 and 0.875,  
43 respectively. Moreover, no differences were found between sensitivities and  
44 specificities of these three kits – KSB, BB and HA – and those of the standard kit.  
45 Due to the low percentage (less than 20%) of early stage in clinic, we can only collect  
46 33 early stage NPC participants in our study. Analyzing the sensitivities by pooling  
47 early and late stage together only was not appropriate. So we did subgroup analysis  
48 and found there were also no statistically significant differences in the sensitivities of  
49 these three kits for early- and advanced-stage NPC. Furthermore, there were no  
50 differences between the early stage sensitivities of these three kits and that of the  
51 standard kit too (0.202 for BB, 0.672 for HA, 0.112 for KSB).  
52  
53  
54  
55  
56  
57  
58  
59  
60

1  
2  
3 As for the standard VCA, we found that the combinations of VCA-IgA and  
4 EBNA1-IgA by logistic models increased the diagnostic accuracy for NPC from less  
5 than 0.946 to more than 0.961 in AUCs. Sensitivities and specificities also increased.  
6 For example, the sensitivity and specificity of BB increased from 0.865 and 0.920 to  
7 0.935 and 0.955, respectively. VCA-IgA and EBNA1-IgA are two antibodies  
8 corresponding to EBV lytic-cycle proteins and latency gene products, respectively.  
9 Therefore, it is reasonable that host antibody responses for lytic-cycle and  
10 latency-associated EBV-related proteins can be complementary to each other in the  
11 diagnosis of NPC, and the combination of both could increase NPC diagnostic  
12 accuracy.<sup>11 30</sup> Furthermore, these three new combinations had diagnostic effects in  
13 sensitivities (including subgroup analysis), specificities and AUCs equal to those of  
14 the standard combination, suggesting that the combinations of the three recombinant  
15 kits can be used for the early detection of and diagnostic screening for NPC. In this  
16 study, the control individuals came from NPC-endemic areas and belonged to a  
17 screening target population, so we attempted to define people at different risk levels  
18 by these new combinations for NPC screening. Compared with other common  
19 diseases, the NPC incidence rate in the screening target population was relatively low  
20 (about 50 per 100,000 person-years)<sup>2 10 31</sup> Thus, it is important that the false-positive  
21 rate be small enough to avoid unnecessary fiberoptic endoscopy/biopsies and  
22 psychological stress for the NPC screening participants. Conversely, the true-positive  
23 rate (equal to sensitivity) should be acceptable.<sup>32</sup> We used two minimally acceptable  
24 false-positive rates of 3% and 7% as the high-risk and medium-risk cutoff values,  
25 respectively,<sup>17</sup> and the corresponding true-positive rates (sensitivities) for these three  
26 kits were 78.0% to 88.0% and 87.5% to 93.5%,<sup>5</sup> respectively. If the baseline serologic  
27 results fulfilled the definition of high risk, the participants were referred for diagnostic  
28 examinations, and different screening intervals were assigned to the high-, medium-  
29 and low-risk groups. The screening intervals for these groups are 1, 1 and 4 years,  
30 respectively.<sup>17</sup>

31  
32  
33 The study had some limitations. First, this study was a Single-center study and all  
34 cases and controls were from NPC-endemic areas of southern China (controls were  
35 from hospital); therefore, these results might not be applicable to other populations.  
36 Second, Due to the low percentage (less than 20%) of early stage in clinic, we can  
37 only collect 33 early stage NPC participants in our study period. But the phenomenon  
38 also indicated that, most patients are typically not detected until NPC is in an  
39 advanced stage. Founding out such people was also very meaningful in real life. Third,  
40 controls were recruited from rural area, but half of the NPC cases were from urban  
41 areas (rural:urban=95:105). Though no evidence showed that there were different  
42 infection rate between rural and urban people, it might cause some other unknown  
43 bias. Fourth, it was a diagnostic trial in case-control design, and new cutoff values of  
44 these new schemes for NPC screening from this study must be verified in prospective  
45 mass screenings.

## 56 57 CONCLUSIONS

1  
2  
3 Three recombinant VCA-IgA kits – KSB, BB and HA – had diagnostic effects equal  
4 to those of the standard kit. They can be substituted for the standard kit, and their  
5 combinations could be used in the early detection of and screening for NPC.  
6  
7

8 **Contributors** Su-Mei Cao and Qing Liu obtained the funding. Rui Gao, Lin Wang  
9 and Li-Fang Zhang contributed to study conception and design; Rui Gao conducted  
10 experiments; Lin Wang, Yan-Fang Ye, Jin-Lin Du, Shang-Hang Xie, Sui-Hong Chen,  
11 Jie Guo and Meng-Jie Yang, Chu-yang Lin acquired or cleaned the data; Rui Gao  
12 analysed and interpreted the data; Rui Gao, Su-Mei Cao and Qing Liu drafted or  
13 revised the manuscript. All authors critically revised the manuscript for important  
14 intellectual content. All authors read and approved the final version of the manuscript.  
15  
16

17  
18 **Funding** This work was supported by the National Natural Science Foundation (No.  
19 81373068) and the Special Fund for Public Health Trade (No. 201202014).  
20  
21

22 **Competing interests** The authors declare no conflicts of interest.  
23

24 **Ethics approval** This study was approved by the Sun Yat-sen University Cancer  
25 Center IRB (YB2015-029-01).  
26  
27

28 **Data sharing statement** Technical appendix, statistical code, and dataset available  
29 from the corresponding author at caosm@sysucc.org.cn and liuqing@sysucc.org.cn.  
30  
31

## 32 REFERENCES

- 33 1. Ma J, Cao S. The epidemiology of nasopharyngeal carcinoma. In: Lu JJ, Cooper JS,  
34 Lee AWM, eds. *Nasopharyngeal cancer*. Berlin: Springer, 2010:1–8.
- 35 2. Jia W-H, Huang Q-H, Liao J, *et al*. Trends in incidence and mortality of  
36 nasopharyngeal carcinoma over a 20–25 year period (1978/1983–2002) in Sihui and  
37 Cangwu counties in southern China. *BMC Cancer* 2006;6:178–85.
- 38 3. Chang ET, Adami HO. The enigmatic epidemiology of nasopharyngeal carcinoma.  
39 *Cancer Epidemiol Biomarkers Prev* 2006;15:1765–77.
- 40 4. Cao SM, Simons MJ, Qian CN. The prevalence and prevention of nasopharyngeal  
41 carcinoma in China. *Chinese J Cancer* 2011;30:114–9.
- 42 5. Sarmiento MP, Mejia MB. Preliminary assessment of nasopharyngeal carcinoma  
43 incidence in the Philippines: a second look at published data from four centers.  
44 *Chinese J Cancer* 2014;33:159–64.
- 45 6. Jia WH. Complex segregation analysis of nasopharyngeal carcinoma in Guangdong,  
46 China: evidence for a multifactorial mode of inheritance (complex segregation  
47 analysis of NPC in China). *Eur J Hum Genet* 2005;13:248–52.
- 48 7. Yu MC, Yuan JM. Epidemiology of nasopharyngeal carcinoma. *Semin Cancer Biol*  
49 2002;12:421–29.
- 50 8. Xue WQ, Qin HD, Ruan HL, *et al*. Quantitative association of tobacco smoking  
51 with the risk of nasopharyngeal carcinoma: a comprehensive meta-analysis of studies  
52 conducted between 1979 and 2011. *Am J Epidemiol* 2013;178:325–38.  
53  
54  
55  
56  
57  
58  
59  
60

- 1  
2  
3 9. Chien YC, Chen JY, Liu MY, *et al.* Serologic markers of Epstein-Barr virus  
4 infection and nasopharyngeal carcinoma in Taiwanese men. *N Engl J Med*  
5 2001;345:1877–82.
- 6  
7 10. Cao SM, Liu Z, Jia WH, *et al.* Fluctuations of Epstein-Barr virus serological  
8 antibodies and risk for nasopharyngeal carcinoma: a prospective screening study with  
9 a 20-year follow-up. *PLoS One* 2011;6:e19100.
- 10  
11 11. Zeng Y, Zhong JM, Li LY, *et al.* Follow-up studies on Epstein-Barr virus  
12 IgA/VCA antibody-positive persons in Zangwu County, China. *Intervirology*  
13 1983;20:190–4.
- 14  
15 12. Chen M, Liu M, Hsu S, *et al.* Use of bacterially expressed EBNA-1 protein cloned  
16 from a nasopharyngeal carcinoma (NPC) biopsy as a screening test for NPC patients.  
17 *J Med Virol* 2001;64:51–7.
- 18  
19 13. Zong YS, Sham JS, Ng MH, *et al.* Immunoglobulin A against viral capsid antigen  
20 of Epstein-Barr virus and indirect mirror examination of the nasopharynx in the  
21 detection of asymptomatic nasopharyngeal carcinoma. *Cancer* 1992;69:3–7.
- 22  
23 14. Yi Z, Yuxi L, Chunren L, *et al.* Application of an immunoenzymatic method and  
24 an immunoradiographic method for a mass survey of nasopharyngeal carcinoma.  
25 *Intervirology* 1980;13:162–8.
- 26  
27 15. Tang B, Liu Q, Cui Y, *et al.* Protocols of screening, early detection and diagnosis  
28 for nasopharyngeal carcinoma. In: Dong Z, Qiao Y, eds. *Protocols of screening, early*  
29 *detection and diagnosis for cancer in P.R.China*. Beijing: People's Medical  
30 Publishing House of P.R. China, 2009:187–8.
- 31  
32 16. Liu Y, Huang QH, Liu WL, *et al.* Establishment of VCA and EBNA1 IgA-based  
33 combination by enzyme-linked immunosorbent assay as preferred screening method  
34 for nasopharyngeal carcinoma: a two-stage design with a preliminary performance  
35 study and a mass screening in southern China. *Int J Cancer* 2012;131:406–16.
- 36  
37 17. Liu ZW, Ji MF, Huang QH, *et al.* Two Epstein-Barr virus–related serologic  
38 antibody tests in nasopharyngeal carcinoma screening: results from the initial phase of  
39 a cluster randomized controlled trial in Southern China. *Am J Epidemiol*  
40 2013;177:242–50.
- 41  
42 18. Department of disease prevention and control, Ministry of health, China. Technical  
43 proposal for early diagnosis and treatment of cancer (2011) (Chinese). Peking:  
44 People's Medical Publishing House (PMPH) 2011:144-71.
- 45  
46 19. Obuchowski N. Testing for equivalence of diagnostic tests. *Am J Radiol*  
47 1997;168:13–7.
- 48  
49 20. Liu JP, Ma MCh, Wu ChY, *et al.* Tests of equivalence and noninferiority for  
50 diagnostic accuracy based on the paired areas under ROC curve. *Statist Med*  
51 2006;25:1219–38.
- 52  
53 21. Zhou XH, Obuchowski NA, McClish DK. *Statistical methods in diagnostic*  
54 *medicine*. New York: Wiley, 2002:188–92.
- 55  
56 22. Chen WZ, Zhang JY. Application of non-inferiority test for diagnostic accuracy  
57 under the areas of ROC based on bootstrap approach and its macro programming  
58 development. *Modern Prev Med (Chinese)* 2010;37:3009–10.
- 59  
60 23. Simel D, Samsa G, Matchar D. Likelihood ratios with confidence: sample size



- 1  
2  
3 estimation for diagnostic test studies. *J Clin Epidemiol* 1991;44:763–70.
- 4 24. Medical Statistics (Third Edition) (Chinese). Peking: People's Medical Publishing  
5 House (PMPH) 2010:93,710.
- 6 25. Fleiss JL. *Reliability of measurement*. The design and analysis of clinical  
7 experiments, 1st edn. New York: Wiley-Interscience, 1986:1–32.
- 8 26. Tang JW, Rohwader E, Chu IM, *et al*. Evaluation of Epstein-Barr virus  
9 antigen-based immunoassays for serological diagnosis of nasopharyngeal carcinoma.  
10 *J Clin Virol* 2007;40:284–8.
- 11 27. Middeldorp JM. Epstein-Barr virus-specific humoral immune responses in health  
12 and disease. *Curr Top Microbiol Immunol* 2015;391:289–323.
- 13 28. Mao YP, Li WF, Chen L, *et al*. A clinical verification of the Chinese 2008 staging  
14 system for nasopharyngeal carcinoma. *Ai Zheng(Chinese)*. 2009;28:1022–8.
- 15 29. Van Grunsven WM, Spaan WJ, Middeldorp JM. Localization and diagnostic  
16 application of immunodominant domains of the BFRF3-encoded Epstein-Barr virus  
17 capsid protein. *J Infect Dis* 1994;170:13–9.
- 18 30. Fachiroh J, Paramita DK, Hariwiyanto B, *et al*. Single assay combination of  
19 Epstein-Barr virus (EBV) EBNA1- and viral capsid antigen-p18-derived synthetic  
20 peptides for measuring anti-EBV Immunoglobulin G (IgG) and IgA antibody levels in  
21 sera from nasopharyngeal carcinoma patients: options for field screening. *J Clin  
22 Microbiol* 2006;44:1459–67.
- 23 31. Wei K, Xu Y, Liu J, *et al*. No incidence trends and no change in pathological  
24 proportions of nasopharyngeal carcinoma in Zhongshan in 1970–2007. *Asian Pacif J  
25 Cancer Prev* 2010;11:1595–9.
- 26 32. Pepe MS, Feng Z, Janes H, *et al*. Pivotal evaluation of the accuracy of a  
27 biomarker used for classification or prediction: standards for study design. *J Natl  
28 Cancer Inst* 2008;100:1432–8.
- 29  
30  
31  
32  
33  
34  
35  
36  
37  
38  
39  
40  
41  
42  
43  
44  
45  
46  
47  
48  
49  
50  
51  
52  
53  
54  
55  
56  
57  
58  
59  
60

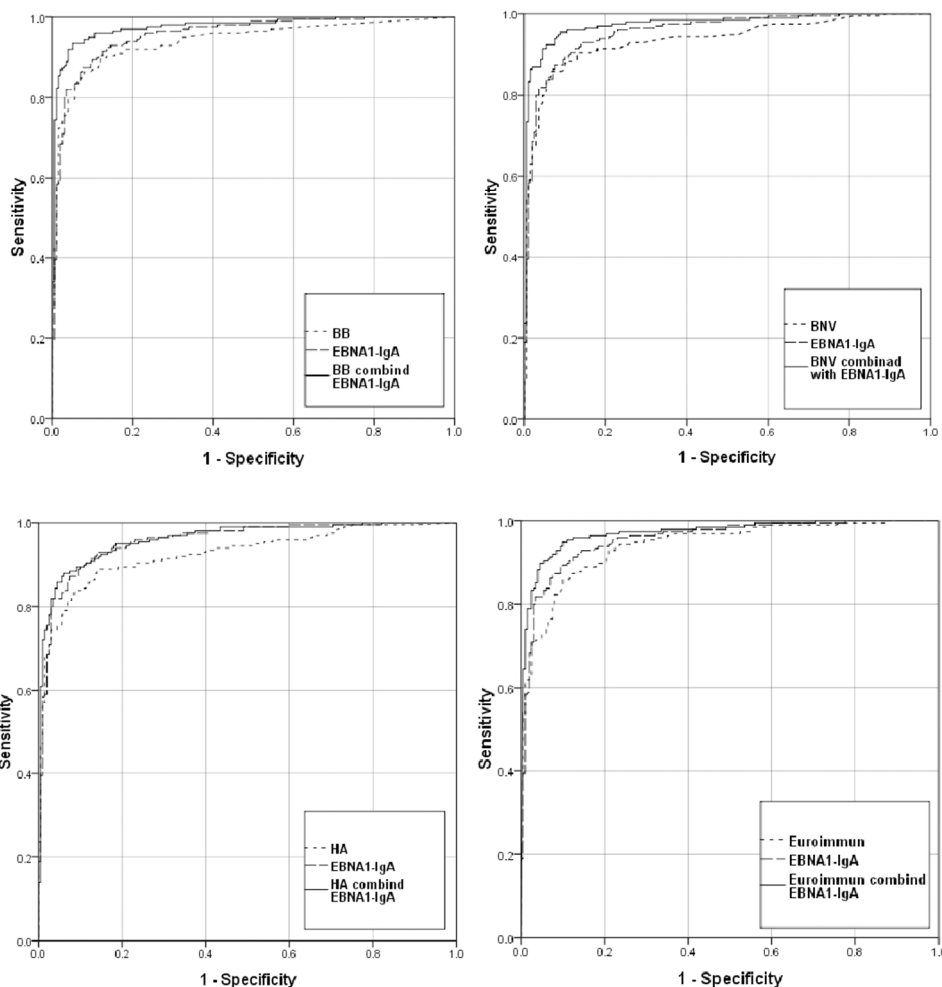

Figure1\_ROCs for BB, BNV, HA, Euroimmun and their combination with EBNA1-IgA

94x96mm (300 x 300 DPI)

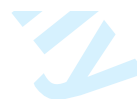

1  
2  
3  
4  
5  
6  
7  
8  
9  
10  
11  
12  
13  
14  
15  
16  
17  
18  
19  
20  
21  
22  
23  
24  
25  
26  
27  
28  
29  
30  
31  
32  
33  
34  
35  
36  
37  
38  
39  
40  
41  
42  
43  
44  
45  
46  
47  
48  
49  
50  
51  
52  
53  
54  
55  
56  
57  
58  
59  
60

## Supplementary Tables

**Table 1.** Sensitivities and Specificities based on manufacturers' cutoffs of VCA-IgA kits and the EBNA1-IgA kit

| Kits      | Sensitivity (%) (95% CI) |                         |                  | Specificity (%) (95% CI) |
|-----------|--------------------------|-------------------------|------------------|--------------------------|
|           | Early stage (95% CI)     | Advanced stage (95% CI) | Total (95% CI)   |                          |
| VCA-IgA   |                          |                         |                  |                          |
| BB        | 69.7(51.0-84.0)          | 85.6(80.8-90.5)         | 83.0 (77.8-88.2) | 94.5 (91.3-97.7)         |
| BNV       | 72.7(54.0-87.0)          | 86.8(82.1-91.5)         | 84.5 (79.5-89.5) | 94.0 (90.7-97.3)         |
| GBI       | 69.7(51.0-84.0)          | 71.9(65.6-78.1)         | 71.5 (65.2-77.8) | 93.0 (89.5-96.5)         |
| HA        | 90.9(76.0-98.0)          | 85.6(80.8-90.5)         | 86.5 (81.8-91.2) | 87.0 (82.3-91.7)         |
| HK        | 84.8(68.0-95.0)          | 85.0(80.1-90.0)         | 85.0 (80.1-89.9) | 85.5 (80.6-90.4)         |
| KSB       | 81.8(64.0-93.0)          | 77.2(71.4-83.1)         | 78.0 (72.3-83.7) | 92.5 (88.8-96.2)         |
| ZS        | 57.6(39.0-74.0)          | 59.3(52.5-66.1)         | 59.0 (52.2-65.8) | 95.5 (92.6-98.4)         |
| Euroimmun | 97.0(85.0-100.0)         | 90.4(86.3-94.5)         | 91.5 (87.6-95.4) | 79.5 (73.9-85.1)         |
| EBNA1-IgA |                          |                         |                  |                          |
|           | 93.9(80.0-99.0)          | 88.6(84.2-93.0)         | 89.5 (84.7-93.3) | 90.0 (85.8-94.2)         |

**Table 2.** CVs of Differences Values of test and retest result of VCA-IgA kits and the EBNA1-IgA kit

| Kits      | CV   |
|-----------|------|
| VCA-IgA   |      |
| BB        | 0.69 |
| BNV       | 0.65 |
| GBI       | 1.00 |
| HA        | 0.34 |
| HK        | 1.55 |
| KSB       | 0.86 |
| ZS        | 1.24 |
| Euroimmun | 0.63 |
| EBNA1-IgA |      |
|           | 0.55 |

| Section & Topic          | No  | Item                                                                                                                                                   | Reported on page # |
|--------------------------|-----|--------------------------------------------------------------------------------------------------------------------------------------------------------|--------------------|
| <b>TITLE OR ABSTRACT</b> |     |                                                                                                                                                        |                    |
|                          | 1   | Identification as a study of diagnostic accuracy using at least one measure of accuracy (such as sensitivity, specificity, predictive values, or AUC)  | 1,2                |
| <b>ABSTRACT</b>          |     |                                                                                                                                                        |                    |
|                          | 2   | Structured summary of study design, methods, results, and conclusions (for specific guidance, see STARD for Abstracts)                                 | 2                  |
| <b>INTRODUCTION</b>      |     |                                                                                                                                                        |                    |
|                          | 3   | Scientific and clinical background, including the intended use and clinical role of the index test                                                     | 2,3                |
|                          | 4   | Study objectives and hypotheses                                                                                                                        | 3                  |
| <b>METHODS</b>           |     |                                                                                                                                                        |                    |
| <i>Study design</i>      | 5   | Whether data collection was planned before the index test and reference standard were performed (prospective study) or after (retrospective study)     | 4                  |
| <i>Participants</i>      | 6   | Eligibility criteria                                                                                                                                   | 4                  |
|                          | 7   | On what basis potentially eligible participants were identified (such as symptoms, results from previous tests, inclusion in registry)                 | 4                  |
|                          | 8   | Where and when potentially eligible participants were identified (setting, location and dates)                                                         | 4                  |
|                          | 9   | Whether participants formed a consecutive, random or convenience series                                                                                | 4                  |
| <i>Test methods</i>      | 10a | Index test, in sufficient detail to allow replication                                                                                                  | 4,5                |
|                          | 10b | Reference standard, in sufficient detail to allow replication                                                                                          | 4,5                |
|                          | 11  | Rationale for choosing the reference standard (if alternatives exist)                                                                                  | 4                  |
|                          | 12a | Definition of and rationale for test positivity cut-offs or result categories of the index test, distinguishing pre-specified from exploratory         | 5                  |
|                          | 12b | Definition of and rationale for test positivity cut-offs or result categories of the reference standard, distinguishing pre-specified from exploratory | 5                  |
|                          | 13a | Whether clinical information and reference standard results were available to the performers/readers of the index test                                 | 4,5                |
|                          | 13b | Whether clinical information and index test results were available to the assessors of the reference standard                                          | 4,5                |
| <i>Analysis</i>          | 14  | Methods for estimating or comparing measures of diagnostic accuracy                                                                                    | 5                  |
|                          | 15  | How indeterminate index test or reference standard results were handled                                                                                | 5                  |
|                          | 16  | How missing data on the index test and reference standard were handled                                                                                 | 5                  |
|                          | 17  | Any analyses of variability in diagnostic accuracy, distinguishing pre-specified from exploratory                                                      | 5                  |
|                          | 18  | Intended sample size and how it was determined                                                                                                         | 4,5                |
| <b>RESULTS</b>           |     |                                                                                                                                                        |                    |
| <i>Participants</i>      | 19  | Flow of participants, using a diagram                                                                                                                  | 5,6                |
|                          | 20  | Baseline demographic and clinical characteristics of participants                                                                                      | 5,6                |
|                          | 21a | Distribution of severity of disease in those with the target condition                                                                                 | 5,6                |
|                          | 21b | Distribution of alternative diagnoses in those without the target condition                                                                            | 5,6                |
|                          | 22  | Time interval and any clinical interventions between index test and reference standard                                                                 | 5,6                |
| <i>Test results</i>      | 23  | Cross tabulation of the index test results (or their distribution) by the results of the reference standard                                            | 6-9                |
|                          | 24  | Estimates of diagnostic accuracy and their precision (such as 95% confidence intervals)                                                                | 6-9                |
|                          | 25  | Any adverse events from performing the index test or the reference standard                                                                            | 6-9                |
| <b>DISCUSSION</b>        |     |                                                                                                                                                        |                    |
|                          | 26  | Study limitations, including sources of potential bias, statistical uncertainty, and generalisability                                                  | 11                 |
|                          | 27  | Implications for practice, including the intended use and clinical role of the index test                                                              | 9-11               |
| <b>OTHER INFORMATION</b> |     |                                                                                                                                                        |                    |
|                          | 28  | Registration number and name of registry                                                                                                               | 11                 |
|                          | 29  | Where the full study protocol can be accessed                                                                                                          | 11                 |
|                          | 30  | Sources of funding and other support; role of funders                                                                                                  | 11                 |

## STARD 2015

---

### AIM

STARD stands for “Standards for Reporting Diagnostic accuracy studies”. This list of items was developed to contribute to the completeness and transparency of reporting of diagnostic accuracy studies. Authors can use the list to write informative study reports. Editors and peer-reviewers can use it to evaluate whether the information has been included in manuscripts submitted for publication.

---

### EXPLANATION

A **diagnostic accuracy study** evaluates the ability of one or more medical tests to correctly classify study participants as having a **target condition**. This can be a disease, a disease stage, response or benefit from therapy, or an event or condition in the future. A medical test can be an imaging procedure, a laboratory test, elements from history and physical examination, a combination of these, or any other method for collecting information about the current health status of a patient.

The test whose accuracy is evaluated is called **index test**. A study can evaluate the accuracy of one or more index tests. Evaluating the ability of a medical test to correctly classify patients is typically done by comparing the distribution of the index test results with those of the **reference standard**. The reference standard is the best available method for establishing the presence or absence of the target condition. An accuracy study can rely on one or more reference standards.

If test results are categorized as either positive or negative, the cross tabulation of the index test results against those of the reference standard can be used to estimate the **sensitivity** of the index test (the proportion of participants *with* the target condition who have a positive index test), and its **specificity** (the proportion *without* the target condition who have a negative index test). From this cross tabulation (sometimes referred to as the contingency or “2x2” table), several other accuracy statistics can be estimated, such as the positive and negative **predictive values** of the test. Confidence intervals around estimates of accuracy can then be calculated to quantify the statistical **precision** of the measurements.

If the index test results can take more than two values, categorization of test results as positive or negative requires a **test positivity cut-off**. When multiple such cut-offs can be defined, authors can report a receiver operating characteristic (ROC) curve which graphically represents the combination of sensitivity and specificity for each possible test positivity cut-off. The **area under the ROC curve** informs in a single numerical value about the overall diagnostic accuracy of the index test.

The **intended use** of a medical test can be diagnosis, screening, staging, monitoring, surveillance, prediction or prognosis. The **clinical role** of a test explains its position relative to existing tests in the clinical pathway. A replacement test, for example, replaces an existing test. A triage test is used before an existing test; an add-on test is used after an existing test.

Besides diagnostic accuracy, several other outcomes and statistics may be relevant in the evaluation of medical tests. Medical tests can also be used to classify patients for purposes other than diagnosis, such as staging or prognosis. The STARD list was not explicitly developed for these other outcomes, statistics, and study types, although most STARD items would still apply.

---

### DEVELOPMENT

This STARD list was released in 2015. The 30 items were identified by an international expert group of methodologists, researchers, and editors. The guiding principle in the development of STARD was to select items that, when reported, would help readers to judge the potential for bias in the study, to appraise the applicability of the study findings and the validity of conclusions and recommendations. The list represents an update of the first version, which was published in 2003.

More information can be found on <http://www.equator-network.org/reporting-guidelines/stard>.

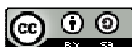

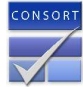

## CONSORT 2010 checklist of information to include when reporting a randomised trial\*

| Section/Topic                    | Item No | Checklist item                                                                                                                                                                              | Reported on page No |
|----------------------------------|---------|---------------------------------------------------------------------------------------------------------------------------------------------------------------------------------------------|---------------------|
| <b>Title and abstract</b>        |         |                                                                                                                                                                                             |                     |
|                                  | 1a      | Identification as a randomised trial in the title                                                                                                                                           | 1,2                 |
|                                  | 1b      | Structured summary of trial design, methods, results, and conclusions (for specific guidance see CONSORT for abstracts)                                                                     | 1,2                 |
| <b>Introduction</b>              |         |                                                                                                                                                                                             |                     |
| Background and objectives        | 2a      | Scientific background and explanation of rationale                                                                                                                                          | 2,3                 |
|                                  | 2b      | Specific objectives or hypotheses                                                                                                                                                           | 3                   |
| <b>Methods</b>                   |         |                                                                                                                                                                                             |                     |
| Trial design                     | 3a      | Description of trial design (such as parallel, factorial) including allocation ratio                                                                                                        | 3,4                 |
|                                  | 3b      | Important changes to methods after trial commencement (such as eligibility criteria), with reasons                                                                                          | 3,4                 |
| Participants                     | 4a      | Eligibility criteria for participants                                                                                                                                                       | 3,4                 |
|                                  | 4b      | Settings and locations where the data were collected                                                                                                                                        | 3,4                 |
| Interventions                    | 5       | The interventions for each group with sufficient details to allow replication, including how and when they were actually administered                                                       | 3,4                 |
| Outcomes                         | 6a      | Completely defined pre-specified primary and secondary outcome measures, including how and when they were assessed                                                                          | 3,4                 |
|                                  | 6b      | Any changes to trial outcomes after the trial commenced, with reasons                                                                                                                       | 3,4                 |
| Sample size                      | 7a      | How sample size was determined                                                                                                                                                              | 3,4                 |
|                                  | 7b      | When applicable, explanation of any interim analyses and stopping guidelines                                                                                                                | 3,4                 |
| <b>Randomisation:</b>            |         |                                                                                                                                                                                             |                     |
| Sequence generation              | 8a      | Method used to generate the random allocation sequence                                                                                                                                      | 4                   |
|                                  | 8b      | Type of randomisation; details of any restriction (such as blocking and block size)                                                                                                         | 4                   |
| Allocation concealment mechanism | 9       | Mechanism used to implement the random allocation sequence (such as sequentially numbered containers), describing any steps taken to conceal the sequence until interventions were assigned | 4                   |
| Implementation                   | 10      | Who generated the random allocation sequence, who enrolled participants, and who assigned participants to interventions                                                                     | 4                   |
| Blinding                         | 11a     | If done, who was blinded after assignment to interventions (for example, participants, care providers, those                                                                                | 4                   |

|    |                          |                                                                                                                     |      |
|----|--------------------------|---------------------------------------------------------------------------------------------------------------------|------|
| 1  |                          |                                                                                                                     |      |
| 2  |                          | assessing outcomes) and how                                                                                         |      |
| 3  |                          |                                                                                                                     |      |
| 4  |                          | 11b If relevant, description of the similarity of interventions                                                     | 5    |
| 5  | Statistical methods      | 12a Statistical methods used to compare groups for primary and secondary outcomes                                   | 5    |
| 6  |                          | 12b Methods for additional analyses, such as subgroup analyses and adjusted analyses                                | 5    |
| 7  |                          |                                                                                                                     |      |
| 8  | <b>Results</b>           |                                                                                                                     |      |
| 9  | Participant flow (a      | 13a For each group, the numbers of participants who were randomly assigned, received intended treatment, and        | 5-9  |
| 10 | diagram is strongly      | were analysed for the primary outcome                                                                               |      |
| 11 | recommended)             | 13b For each group, losses and exclusions after randomisation, together with reasons                                | 5-9  |
| 12 | Recruitment              | 14a Dates defining the periods of recruitment and follow-up                                                         | 8-9  |
| 13 |                          | 14b Why the trial ended or was stopped                                                                              | 8-9  |
| 14 |                          |                                                                                                                     |      |
| 15 | Baseline data            | 15 A table showing baseline demographic and clinical characteristics for each group                                 | 5,6  |
| 16 | Numbers analysed         | 16 For each group, number of participants (denominator) included in each analysis and whether the analysis was      | 5,6  |
| 17 |                          | by original assigned groups                                                                                         |      |
| 18 |                          |                                                                                                                     |      |
| 19 | Outcomes and             | 17a For each primary and secondary outcome, results for each group, and the estimated effect size and its           | 6-9  |
| 20 | estimation               | precision (such as 95% confidence interval)                                                                         |      |
| 21 |                          | 17b For binary outcomes, presentation of both absolute and relative effect sizes is recommended                     | 6-9  |
| 22 | Ancillary analyses       | 18 Results of any other analyses performed, including subgroup analyses and adjusted analyses, distinguishing       | 8-9  |
| 23 |                          | pre-specified from exploratory                                                                                      |      |
| 24 |                          |                                                                                                                     |      |
| 25 | Harms                    | 19 All important harms or unintended effects in each group (for specific guidance see CONSORT for harms)            | 8    |
| 26 |                          |                                                                                                                     |      |
| 27 | <b>Discussion</b>        |                                                                                                                     |      |
| 28 | Limitations              | 20 Trial limitations, addressing sources of potential bias, imprecision, and, if relevant, multiplicity of analyses | 11   |
| 29 | Generalisability         | 21 Generalisability (external validity, applicability) of the trial findings                                        | 9-11 |
| 30 | Interpretation           | 22 Interpretation consistent with results, balancing benefits and harms, and considering other relevant evidence    | 9-11 |
| 31 |                          |                                                                                                                     |      |
| 32 | <b>Other information</b> |                                                                                                                     |      |
| 33 | Registration             | 23 Registration number and name of trial registry                                                                   | 11   |
| 34 | Protocol                 | 24 Where the full trial protocol can be accessed, if available                                                      | 5,11 |
| 35 | Funding                  | 25 Sources of funding and other support (such as supply of drugs), role of funders                                  | 11   |
| 36 |                          |                                                                                                                     |      |

\*We strongly recommend reading this statement in conjunction with the CONSORT 2010 Explanation and Elaboration for important clarifications on all the items. If relevant, we also recommend reading CONSORT extensions for cluster randomised trials, non-inferiority and equivalence trials, non-pharmacological treatments, herbal interventions, and pragmatic trials. Additional extensions are forthcoming: for those and for up to date references relevant to this checklist, see [www.consort-statement.org](http://www.consort-statement.org).
